# Supplementary material for: Asymmetric synthesis of cyclic β-amino carbonyl derivatives by a formal [3 + 2] photocycloaddition
Source: Royal Society of Chemistry journal article supplement (doi:10.1039/d1cc05867c), 2021-12-13
Supplement: d1cc05867c1.pdf [file d1cc05867c1.pdf]

## Supporting Information

### Asymmetric synthesis of Cyclic $\beta$ -Amino Carbonyl Derivatives by a Formal [3+2] Photocycloaddition

Leonardo Mollari, Miguel A. Valle-Amores, Ana M. Martínez-Gualda, Leyre Marzo, Alberto Fraile,\* José Aleman\*

#### Contents

|                                            |      |
|--------------------------------------------|------|
| 1. General considerations                  | S-2  |
| 2. General procedures                      | S-3  |
| 3. Preparation of starting materials       | S-5  |
| 4. Screening of the reaction conditions    | S-8  |
| 5. Synthesis of compounds <b>3</b>         | S-9  |
| 6. Synthetic playground information        | S-17 |
| 7. UV-visible absorption spectra           | S-19 |
| 8. Quantum Yield determination             | S-19 |
| 9. NMR spectra section                     | S-22 |
| 10. X-ray information                      | S-39 |
| 11. SFC chromatograms for quiral compounds | S-41 |
| 12. References                             | S-54 |

## 1. General considerations.

The  $^1\text{H}$ -NMR and  $^{13}\text{C}$ -NMR spectra were recorded on a *Bruker Avance 300 MHz spectrometer* running at 300 MHz for  $^1\text{H}$  and 75 MHz for  $^{13}\text{C}$  or on a *Bruker DRX-500 spectrometer* running at 500 MHz for  $^1\text{H}$ , 126 MHz for  $^{13}\text{C}$  and 471 MHz for  $^{19}\text{F}$  coupled mode, respectively. The chemical shifts ( $\delta$ ) are reported relative to the tetramethylsilane signal at 0 ppm or relative to the residual signal of the solvent ( $\text{CDCl}_3$  at 7.26 ppm or  $\text{C}_2\text{D}_2\text{Cl}_4$  at 5.91 ppm), while for  $^{13}\text{C}$ -NMR are given in ppm relative to the residual signal of solvent ( $\text{CDCl}_3$  at 77.16 ppm or  $\text{C}_2\text{D}_2\text{Cl}_4$  at 74.2 ppm)  $^{13}\text{C}$  NMR spectra were acquired on a broadband decoupled mode. The following abbreviations are used to indicate the multiplicity: s, singlet; d, doublet; dd, doublet of doublets; ddd, doublet of doublet of doublets; t, triplet; dt, doublet of triplets; td, triplet of doublets; tt, triplet of triplets; q, quartet; dq, doublet of quartets; p, pentuplet; m, multiplet; br, broad signal. The following abbreviations are used to indicate the solvents: Cy, Cyclohexane; DCM, dichloromethane, EtOH, Ethanol; EtOAc, Ethyl acetate; MeOH, Methanol; THF, Tetrahydrofuran.

Optical rotations were measured on an Anton Paar NCP 100 Polarimeter at room temperature and  $[\alpha]^{20}_{\text{D}}$  values are given in  $\text{deg}\cdot\text{mL}\cdot\text{g}^{-1}\cdot\text{dm}^{-1}$ ; concentration  $c$  is listed in  $\text{g}\cdot(100\text{ mL})^{-1}$ .

Enantiomeric excess was determined on an *SFC Agilent Technologies 1260 Infinity Series* instrument equipped with a UV-VIS detector, employing *Daicel Chiralpak IA, IB-3, IC, ID, and IG-3* columns as chiral stationary phase. The exact conditions for the analyses are specified in each case.

High-Resolution Mass Spectra (HRMS) were obtained on an *Agilent Technologies 6120 Quadrupole LC/MS* coupled with an *SFC Agilent technologies 1260 Infinity Series* instrument for the ESI-MS (Electrospray Ionization). *MassWorks* software version 4.0.0.0 (*Cerno Bioscience*) was used for the formula identification. *MassWorks* is an MS calibration software which calibrates isotope profiles to achieve high mass accuracy and enables elemental composition determination on conventional mass spectrometers of unit mass resolution allowing highly accurate comparisons between calibrated and theoretical spectra.<sup>[1]</sup>

Commercial grade reagents and solvent were purchased from *Sigma-Aldrich, Alfa Aesar, Fluorochem, TCI Chemicals* and used without further purifications while anhydrous solvents were taken from a SPS solvent dispenser.

Analytical TLC was performed using pre-coated aluminium-backed plates (*Merck TLC Silicagel 60 F<sub>254</sub>*) and visualized by ultraviolet irradiation. Chromatographic purification of products was accomplished using flash column chromatography (FC) on *Merck Geduran<sup>®</sup> Si 60 silica gel (40 – 63  $\mu\text{m}$ )*. *Celite<sup>®</sup> 512 medium (Sigma-Aldrich)* was used for filtration. Organic solutions were concentrated under reduced pressure on a Büchi rotary evaporator.

The stereogenic-at-metal Lewis's acid catalysts  $\Delta/\lambda$ -Rh were synthesized according to published reports.<sup>[2]</sup>

## 2. General Procedures.

**2.1. General Procedure GP1 for the synthesis of the Michael acceptor derivatives from the corresponding ester.**

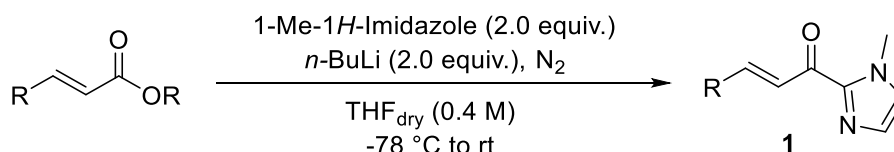

Following a modified procedure described by Evans et al.:<sup>[3]</sup> To a solution of 1-methyl-1H-imidazole (2.0 equiv.) in dry THF (0.4 M) at -78 °C was added  $n$ -BuLi (2.5M in Hexanes, 2.0 equiv.) dropwise. The reaction was stirred at -78 °C for 30 min, then stirred at room temperature for another 30 min. The corresponding  $\alpha,\beta$ -unsaturated ester (1 equiv. in THF) was added dropwise to the flask after the reaction was cooled back down to -78 °C. The reaction was allowed to slowly warm to room temperature and stirred overnight. The reaction was quenched with  $NH_4Cl$  sat. solution and extracted with EtOAc. The organic layers were washed with brine, and the combined organic layers were dried over anhydrous  $MgSO_4$  and concentrated under reduced pressure. The residue was further purified by flash column chromatography on silica gel (Cy / EtOAc) to provide the 2-acylimidazoles **1a**, **1b**, **1f**, **1g**, and **1h**.

**2.1.2. General Procedure GP2 for the synthesis of Michael acceptor derivatives through aldolic reaction.<sup>[4]</sup>**

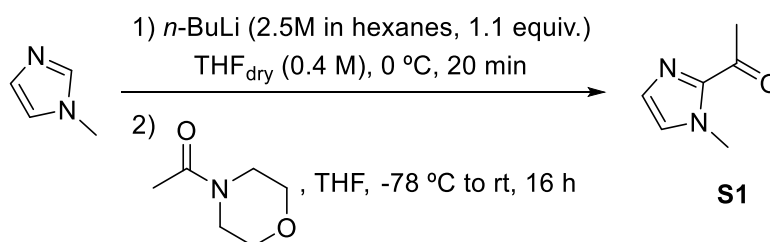

**Step 1:** To a solution of 1-methyl-1H-imidazole (9.3 mL, 80 mmol, 1.0 equiv.) in dry THF (50 mL) was added  $n$ -BuLi (2.5 M in hexanes, 35.2 mL, 88 mmol, 1.1 equiv.) dropwise at 0 °C. The reaction mixture was stirred for 20 min and was then transferred via cannula to a solution of 4-acetylmorpholine in dry THF (50 mL) at -78 °C. The resulting mixture was allowed to warm to rt and stirred for a further 16 h. The reaction was then quenched by addition of a 3M aqueous solution of HCl (3.3 mL), diluted with additional water and extracted with EtOAc (3 x 100 mL). The combined organic layers were washed with brine, dried over anhydrous  $MgSO_4$  and concentrated under reduced pressure. Purification by flash column chromatography over silica gel (Cy / EtOAc = 1 : 1) afforded the desired product **S1** as a colourless oil (7.4 g, 59 mmol, 74%).

**1-(1-methyl-1H-imidazol-2-yl)ethan-1-one (S1).**

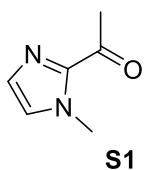

Spectroscopic data were consistent with the literature data for this compound.<sup>[5]</sup>

**<sup>1</sup>H-NMR** (300 MHz,  $CDCl_3$ ):  $\delta$  7.11 (brs, 1H), 7.00 (brs, 1H), 3.98 (s, 3H), 2.64 (s, 3H).

**<sup>13</sup>C-NMR** (75 MHz,  $CDCl_3$ ):  $\delta$  190.5, 143.1, 128.9, 126.8, 36.1, 27.1.

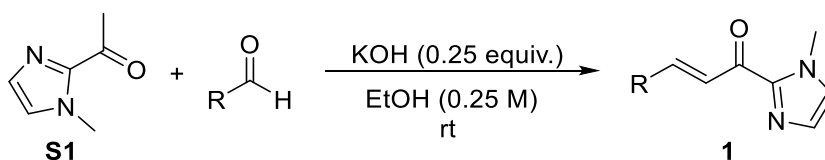

**Step 2.** To a round bottom flask, 2-acetyl-1-methyl-1*H*-imidazole (**S1**) (1 equiv.) and EtOH (0.25 M) were added. After stirring 10 minutes, the desired aldehyde (1 equiv.) and a catalytic amount of KOH (0.25 equiv.) were added. The solution was stirred until reaction completion monitored by TLC. The solvent was evaporated, and the obtained residue was dissolved in CHCl<sub>3</sub> and washed with NH<sub>4</sub>Cl sat. solution. The aqueous phase was extracted three times with CHCl<sub>3</sub> and the combined organic layers were dried over MgSO<sub>4</sub>. The crude was further purified by flash column chromatography on silica gel.

## 2.2. General Procedure **GP3** for the synthesis of *N*-unsubstitued imines.<sup>[6]</sup>

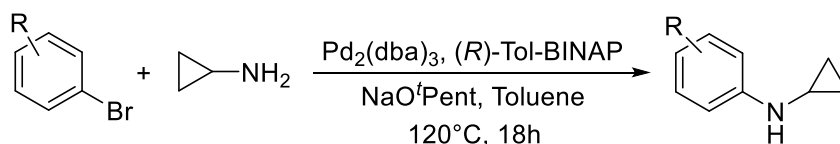

Following a modified procedure,<sup>[7]</sup> an oven-dried microwave vial was charged with Pd<sub>2</sub>(dba)<sub>3</sub> (1 mol%), (*R*)-Tol-BINAP (3 mol%) and NaO<sup>t</sup>Pent (1.5 equiv.). Then, toluene (0.5 M), cyclopropylamine (2.0 equiv.) and the aromatic bromide (1 equiv.) were added via syringe to the vial, and it was heated at 120 °C for 18 h. The reaction mixture was then cooled to room temperature, diluted with Et<sub>2</sub>O, and filtered through a small pad of Celita®. The filtrate was evaporated under reduced pressure, and the obtained crude residue was subjected to column chromatography with the indicated solvents in each case.

### 3. Preparation of the starting materials.

#### (*E*)-1-(1-methyl-1*H*-imidazol-2-yl)but-2-en-1-one (**1a**).

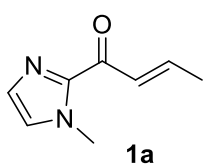

Following the general procedure **GP1**, from (*E*)-methyl but-2-enoate, compound **1a** was obtained in as an orange oil after purification by flash column chromatography (Cy : EtOAc = 80 : 20). Spectroscopic data were consistent with the literature data for this compound.<sup>[3]</sup>

<sup>1</sup>H-NMR (300 MHz, CDCl<sub>3</sub>): δ 7.40 (dq, *J* = 15.5, 1.6 Hz, 1H), 7.17 – 7.05 (m, 2H), 7.03 (s, 1H), 4.03 (s, 3H), 1.98 (dd, *J* = 6.9, 1.6 Hz, 3H).

#### (*E*)-1-(1-methyl-1*H*-imidazol-2-yl)pent-2-en-1-one (**1b**).

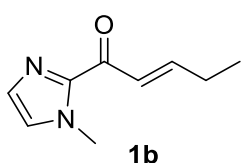

Following the general procedure **GP1**, from (*E*)-methyl pent-2-enoate, compound **1b** was obtained as an orange oil after purification by flash column chromatography (Cy : EtOAc = 80 : 20). Spectroscopic data were consistent with the literature data for this compound.<sup>[3]</sup>

<sup>1</sup>H-NMR (300 MHz, CDCl<sub>3</sub>): δ 7.39 (dt, *J* = 15.7, 1.6 Hz, 1H), 7.23 – 7.12 (m, 2H), 7.03 (s, 1H), 4.04 (s, 3H), 2.39 – 2.29 (m, 2H), 1.13 (t, *J* = 7.4 Hz, 3H).

#### (*E*)-4-methyl-1-(1-methyl-1*H*-imidazol-2-yl)pent-2-en-1-one (**1c**).

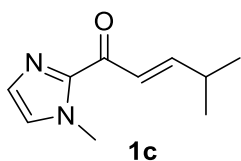

Following the general procedure **GP2**, from isobutyraldehyde, compound **1c** was obtained as an orange oil after purification by flash column chromatography (Cy : EtOAc = 85 : 15). Spectroscopic data were consistent with the literature data for this compound.<sup>[3]</sup>

<sup>1</sup>H-NMR (300 MHz, CDCl<sub>3</sub>): δ 7.35 (dd, *J* = 15.7, 1.4 Hz, 1H), 7.16 (s, 1H), 7.09 (dd, *J* = 15.7, 6.7 Hz, 1H), 7.03 (s, 1H), 4.03 (s, 3H), 2.57 – 2.50 (m, 1H), 1.12 (d, *J* = 6.8 Hz, 6H).

#### (*E*)-3-cyclohexyl-1-(1-methyl-1*H*-imidazol-2-yl)prop-2-en-1-one (**1d**).

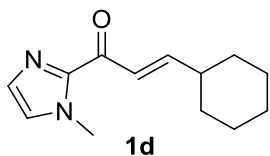

Following the general procedure **GP2**, from cyclohexylaldehyde, compound **1d** was obtained as a yellow oil after purification by flash column chromatography (Cy : EtOAc = 55 : 45). Spectroscopic data were consistent with the literature data for this compound.<sup>[8]</sup>

<sup>1</sup>H-NMR (300 MHz, CDCl<sub>3</sub>): δ 7.35 (dd, *J* = 15.8, 1.4 Hz, 1H), 7.16 (s, 1H), 7.06 (dd, *J* = 15.8, 6.8 Hz, 1H), 7.02 (s, 1H), 4.03 (s, 3H), 2.13 – 2.19 (m, 1H), 1.88 – 1.79 (m, 2H), 1.79 – 1.72 (m, 2H), 1.68 – 1.76 (m, 1H), 1.38 – 1.13 (m, 5H).

**(E)-4,4-dimethyl-1-(1-methyl-1H-imidazol-2-yl)pent-2-en-1-one (1e).**

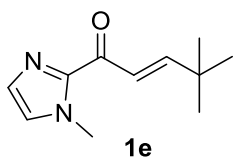

Following the general procedure **GP2**, from pivaldehyde, compound **1e** was obtained as a yellow oil after purification by flash column chromatography (Cy : EtOAc = 85 : 15). Spectroscopic data were consistent with the literature data for this compound.<sup>[9]</sup>

<sup>1</sup>H-NMR (300 MHz, CDCl<sub>3</sub>): δ 7.33 (d, *J* = 15.8 Hz, 1H), 7.18 (s, 1H), 7.12 (d, *J* = 15.8 Hz, 1H), 7.04 (brs, 1H), 4.05 (s, 3H), 1.15 (s, 9H).

**(E)-1-(1-methyl-1H-imidazol-2-yl)-3-phenylprop-2-en-1-one (1f).**

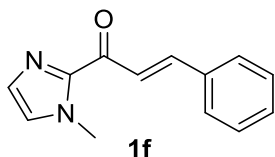

Following the general procedure **GP1**, from ethyl *trans*-cinnamate, compound **1f** was obtained as a white solid after purification by flash column chromatography (Cy : EtOAc = 85 : 15). Spectroscopic data were consistent with the literature data for this compound.<sup>[4]</sup>

<sup>1</sup>H-NMR (300 MHz, CDCl<sub>3</sub>): δ 8.08 (d, *J* = 16.0 Hz, 1H), 7.83 (d, *J* = 16.0 Hz, 1H), 7.73 – 7.67 (m, 2H), 7.44 – 7.36 (m, 3H), 7.22 (d, *J* = 0.9 Hz, 1H), 7.08 (d, *J* = 0.9 Hz, 1H), 4.10 (s, 3H).

**(E)-3-(4-bromophenyl)-1-(1-methyl-1H-imidazol-2-yl)prop-2-en-1-one (1g).**

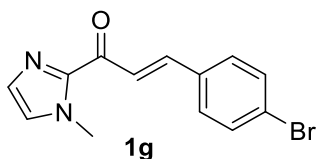

Following the general procedure **GP1**, from ethyl *trans*-4-bromocinnamate, compound **1g** was obtained as a white solid after purification by flash column chromatography (Cy : EtOAc = 85 : 15). Spectroscopic data were consistent with the literature data for this compound.<sup>[4]</sup>

<sup>1</sup>H-NMR (300 MHz, CDCl<sub>3</sub>): δ 8.06 (d, *J* = 16.0 Hz, 1H), 7.74 (d, *J* = 16.0 Hz, 1H), 7.57 – 7.52 (m, 4H), 7.22 (d, *J* = 1.0 Hz, 1H), 7.09 (d, *J* = 0.9 Hz, 1H), 4.10 (s, 3H).

**(E)-1-(1-methyl-1H-imidazol-2-yl)-3-(4-nitrophenyl)prop-2-en-1-one (1h).**

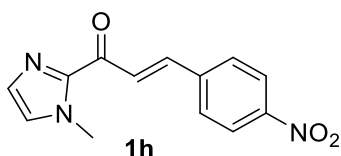

Following the general procedure **GP1**, from ethyl *trans*-4-nitrocinnamate, compound **1h** was obtained as a yellow solid after purification by flash column chromatography (Cy : EtOAc = 55 : 45). Spectroscopic data were consistent with the literature data for this compound.<sup>[10]</sup>

<sup>1</sup>H-NMR (300 MHz, CDCl<sub>3</sub>): δ 8.26 (d, *J* = 8.7 Hz, 2H), 8.19 (d, *J* = 16.1 Hz, 1H), 7.85 – 7.78 (m, 3H), 7.26 – 7.23 (m, 1H), 7.15 – 7.11 (m, 1H), 4.11 (s, 3H).

**N-cyclopropylaniline (2a).**

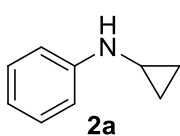

Following the general procedure **GP3**, from bromobenzene, compound **2a** was obtained as a colorless oil after purification by flash column chromatography (Cy : EtOAc = 95 : 5) and further vacuum distilled. Spectroscopic data were consistent with the literature data for this compound.<sup>[6]</sup>

<sup>1</sup>H-NMR (300 MHz, CDCl<sub>3</sub>): δ 7.24 – 7.15 (m, 2H), 6.84 – 6.77 (m, 2H), 6.77 – 6.70 (m, 1H), 4.21 (brs, 1H, NH), 2.43 (tt, *J* = 6.7, 3.6 Hz, 1H), 0.77 – 0.70 (m, 2H), 0.56 – 0.49 (m, 2H).

#### 4-Chloro-*N*-cyclopropylaniline (2b).

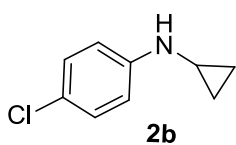

Following the general procedure **GP3**, from 1-bromo-4-chlorobenzene, compound **2b** was obtained as a yellow oil after purification by flash column chromatography (Cy : EtOAc = 95 : 5) and further vacuum distilled. Spectroscopic data were consistent with the literature data for this compound.<sup>[6]</sup>

<sup>1</sup>H-NMR (300 MHz, CDCl<sub>3</sub>): δ 7.13 (d, *J* = 8.9 Hz, 2H), 6.72 (d, *J* = 8.8 Hz, 2H), 4.61 (brs, 1H), 2.47 – 2.36 (m, 1H), 0.78 – 0.70 (m, 2H), 0.57 – 0.49 (m, 2H).

#### *N*-Cyclopropyl-3,5-bis(trifluoromethyl)aniline (2c).

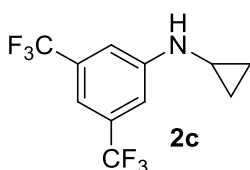

Following the general procedure **GP3**, from 1-bromo-3,5-bis(trifluoromethyl)benzene, compound **2c** was obtained as a light-red oil after purification by flash column chromatography (Cy : EtOAc = 95 : 5) and further vacuum distilled. Spectroscopic data were consistent with the literature data for this compound.<sup>[6]</sup>

<sup>1</sup>H-NMR (300 MHz, CDCl<sub>3</sub>): δ 7.19 – 7.15 (m, 1H), 7.12 – 7.09 (m, 2H), 2.48 (tt, *J* = 6.7, 3.6 Hz, 1H), 0.88 – 0.80 (m, 2H), 0.59 – 0.52 (m, 2H).

#### 4-(*tert*-Butyl)-*N*-cyclopropylaniline (2d).

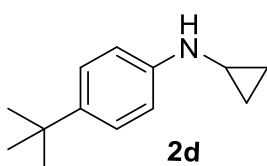

Following the general procedure **GP3**, from 1-bromo-4-(*tert*-butyl)benzene, compound **2d** was obtained as a yellow oil after purification by flash column chromatography (Cy : EtOAc = 95 : 5) and further vacuum distilled.

<sup>1</sup>H-NMR (300 MHz, CDCl<sub>3</sub>): δ 7.21 and 6.74 (AA'BB' system, 4H); 2.39 (tt, *J* = 6.6, 3.6 Hz, 1H), 1.28 (s, 9H), 0.82 – 0.58 (m, 2H), 0.53 – 0.44 (m, 2H).

<sup>13</sup>C-NMR (76 MHz, CDCl<sub>3</sub>): δ 146.4, 140.6, 126.0 (2C), 113.0 (2C), 34.0, 31.7 (3C), 25.5, 7.5 (2C).

HRMS (ESI): Calculated for C<sub>13</sub>H<sub>19</sub>N [M + H]<sup>+</sup>: 190.1517, found 190.1515.

#### *N*-Cyclopropylnaphthalen-1-amine (2e).

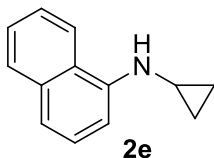

Following the general procedure **GP3**, from 1-bromonaphthalene, compound **2e** was obtained as a green-blue oil after purification by flash column chromatography (Cy : EtOAc = 95 : 5). Spectroscopic data were consistent with the literature data for this compound.<sup>[6]</sup>

<sup>1</sup>H-NMR (300 MHz, CDCl<sub>3</sub>): δ 7.83 – 7.77 (m, 1H), 7.76 – 7.70 (m, 1H), 7.49 – 7.37 (m, 3H), 7.29 (d, *J* = 8.2 Hz, 1H), 7.08 (dd, *J* = 7.6, 1.1 Hz, 1H), 4.89 (brs, 1H), 2.59 (tt, *J* = 6.8, 3.6 Hz, 1H), 0.90 – 0.81 (m, 2H), 0.69 – 0.62 (m, 2H).

## 4. Screening of the reaction conditions.

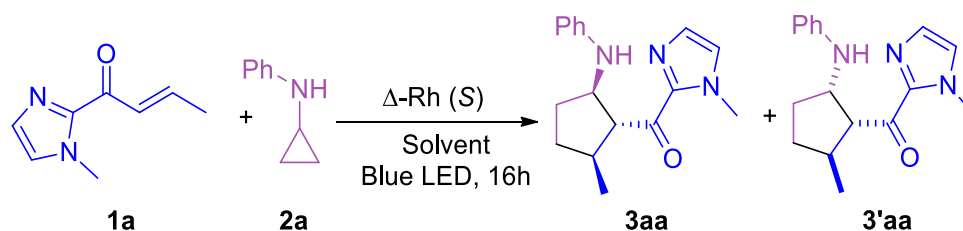

**Table S1.** Full screening of the reaction conditions.

| Entry           | Ratio (1a:2a) | $\Delta\text{-Rh}$ (mol%) | PC          | hv         | Solvent                                 | Conversion <sup>c</sup> [dr] <sup>d</sup> | Yield [ee] <sup>e</sup> |
|-----------------|---------------|---------------------------|-------------|------------|-----------------------------------------|-------------------------------------------|-------------------------|
| 1               | 1:2           | 2                         | None        | Yes        | MeCN (0.2M)                             | 100% [1.3:1]                              | 37% [79%]               |
| 2               | 1:2           | 2                         | CBz (2%)    | Yes        | MeCN (0.2M)                             | 100% [1.1:1]                              | 33% [75%]               |
| 3               | 1:2           | None                      | None        | Yes        | MeCN (0.2M)                             | 16% [1:5]                                 | -                       |
| 4               | 1:2           | 2                         | None        | no         | MeCN (0.2M)                             | 0%                                        | -                       |
| 5               | 1:2           | 5                         | None        | Yes        | MeCN (0.2M)                             | 100% [2:1]                                | 40% [91%]               |
| 6               | 1:2           | 5                         | None        | Yes        | MeCN (0.33M)                            | 100% [3:1]                                | 47% [92%]               |
| 7               | 1:2           | 5                         | None        | Yes        | MeCN (0.5M)                             | 100% [2.5:1]                              | 43% [92%]               |
| 8               | 1:3           | 5                         | None        | Yes        | MeCN (0.33M)                            | 100% [3.2:1]                              | 25% [91%]               |
| 9               | 3:1           | 5                         | None        | Yes        | MeCN (0.33M)                            | 0%                                        | -                       |
| 10 <sup>a</sup> | 1:2           | 5                         | None        | Yes        | MeCN (0.33M)                            | 100% [2:1]                                | 31% [93%]               |
| 11 <sup>b</sup> | 1:2           | 5                         | None        | Yes        | MeCN (0.2M)                             | 100% [2.3:1]                              | 35% [93%]               |
| 12              | 1:2           | 5                         | None        | Yes        | MeOH (0.33M)                            | 0%                                        | -                       |
| 13              | 1:2           | 5                         | None        | Yes        | CH <sub>2</sub> Cl <sub>2</sub> (0.33M) | 100% [2.5:1]                              | 43% [91%]               |
| 14              | 1:2           | 5                         | None        | Yes        | Toluene (0.33M)                         | 100% [2.5:1]                              | 38% [92%]               |
| <b>15</b>       | <b>1:2</b>    | <b>5</b>                  | <b>None</b> | <b>Yes</b> | <b>Acetone (0.33M)</b>                  | <b>100% [3.3:1]</b>                       | <b>50% [93%]</b>        |
| 16              | 1:2           | 8                         | None        | Yes        | Acetone (0.33M)                         | 100% [3.5:1]                              | 53% [94%]               |

<sup>a</sup> The reaction was performed at 0 °C. <sup>b</sup> The reaction was performed at 45 °C. <sup>c</sup> Determined by <sup>1</sup>H-RMN. <sup>d</sup> Ratio **3aa** : **3'aa**. <sup>e</sup> Value for the major diastereoisomer **3aa**.



## 5. Synthesis of compounds 3.

### 5.1. Photoreactor Setup.

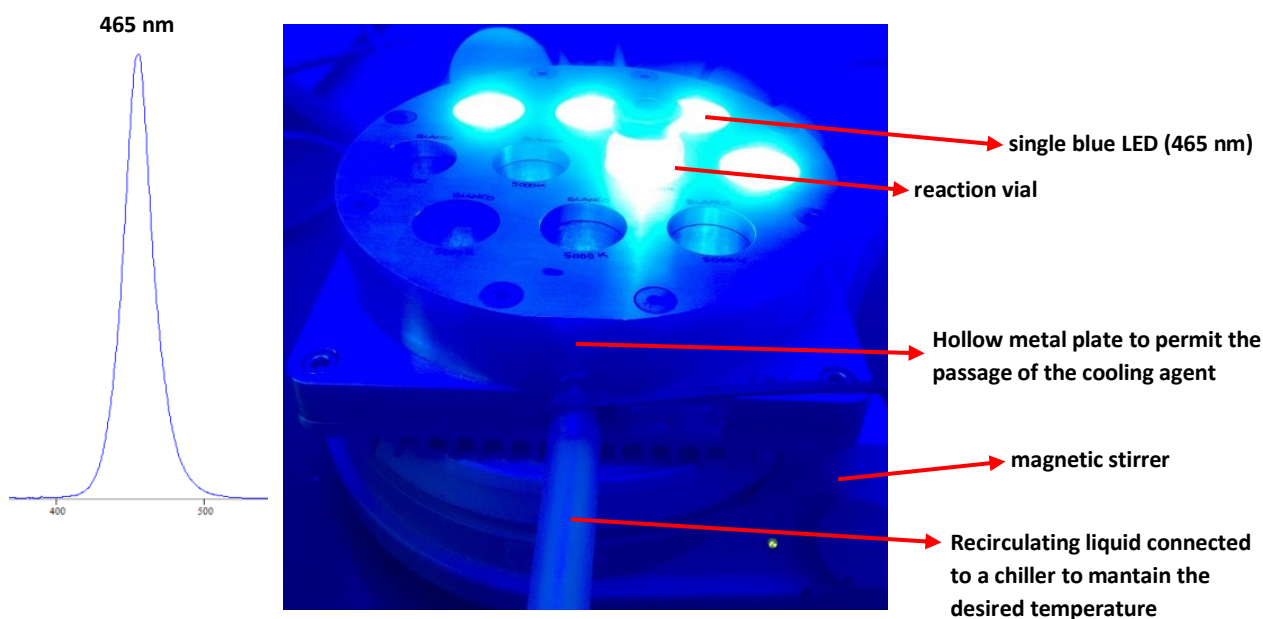

Figure S1: Photoreactor setup

### 5.2. General procedure A for the Michael acceptor scope.

#### 5.2.1. GPA 1: Procedure for alkylic residues (R = alkyl).

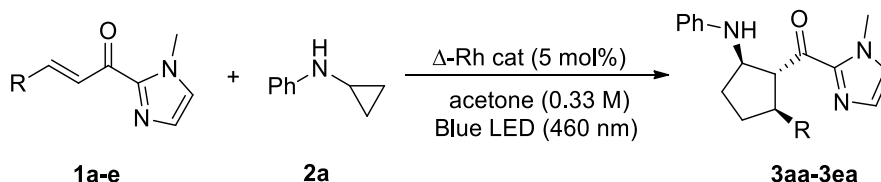

An oven-dried 6 mL vial equipped with a magnetic stirring bar was charged with the Michael acceptor **1a-e** (0.05 mmol), *N*-cyclopropylaniline (**2a**) (2.0 equiv.), and  $\Delta$ -Rh cat. (5 mol%). Then, 150  $\mu$ L of acetone was added. The vial was closed with a PTFE/rubber septum. The reaction mixture was irradiated and stirred in the photoreactor setup at 465 nm for 2 hours. After the reaction was complete, the solvent was eliminated under reduced pressure and the residue was further purified by flash column chromatography to afford the corresponding products **3aa-3ea**.

#### 5.2.2. GPA 2: Procedure for aromatic residues (R = Aryl).

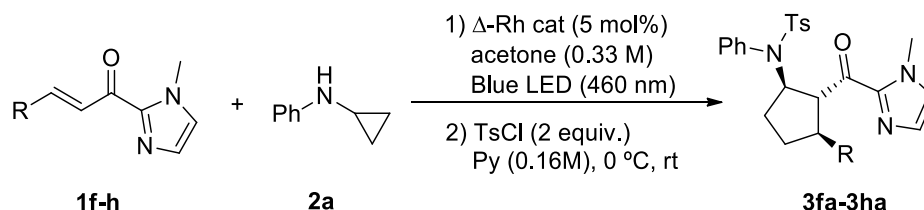

An oven-dried 6 mL vial equipped with a magnetic stirring bar was charged with the Michael acceptor **1f-h** (0.05 mmol), *N*-cyclopropylaniline (**2a**) (2.0 equiv.) and  $\Delta$ -Rh cat. (5 mol%). Then, 150  $\mu$ L of acetone was added. The vial was closed with a PTFE/rubber septum. Then, the reaction was irradiated and stirred in the photoreactor setup at 465 nm for 2 hours. After the reaction was complete, the solvent was evaporated under reduced pressure.

To the crude mixture, obtained before, was added pyridine and the mixture was stirred for 10 min at 0 °C. Then, 4-toluenesulfonyl chloride was added dropwise and further stirred at rt for 2h. After completion of the reaction, ice water was added and extracted with  $\text{CH}_2\text{Cl}_2$ . The organic layer was separated, dried over  $\text{MgSO}_4$  and vacumed. The residue was purified by flash column chromatography to afford the desired product.

Tosylation reaction was required to separate complex diastereoisomers mixture **3fa-3ha**.

### 5.2.3. GPA 3: Mesylation procedure.

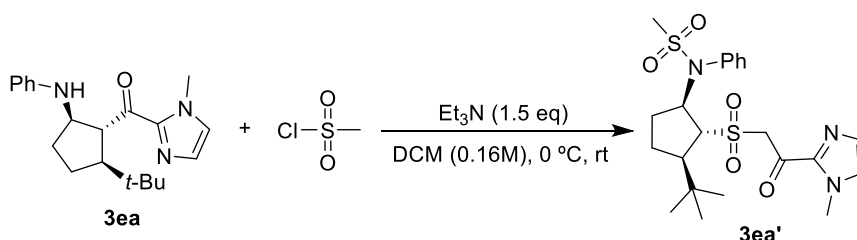

Triethylamine was added to a solution of **3ea** in dichloromethane and stirred at 0 °C for 10 min. Then, methanesulfonyl chloride (2 equiv.) was added dropwise at that temperature. The reaction was allowed to warm up to room temperature and the reaction was stirred until completion by TLC (Cy : AcOEt = 80 :20). After completion of the reaction, ice water was added and extracted with  $\text{CH}_2\text{Cl}_2$ . The organic layers were dried over  $\text{MgSO}_4$  and concentrated under vacuum. The residue was purified by flash column chromatography (Cy : AcOEt = 80 :20) to afford the desired product **3ea'**.

Mesylation was needed to determine the enantiomeric excess of **3ea**.

### 5.3. General procedure B for the imine scope (GPB).

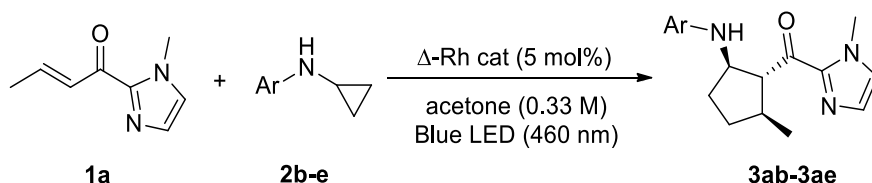

An oven-dried 6 mL vial equipped with a magnetic stirring bar was charged with (*E*)-1-(1-methyl-1*H*-imidazol-2-yl)but-2-en-1-one (**1a**) (0.05 mmol), the desired *N*-cyclopropylarylamine **2b-e** (2.0 equiv.) and  $\Delta$ -Rh cat. (5 mol%). Then, 0.15 mL of acetone were added, the vial was closed with PTFE/rubber septum, and the reaction was irradiated and stirred in the photoreactor setup at 465 nm for 2h. After the reaction was complete, the solvent was evaporated under reduced pressure and the residue was further purified by flash column chromatography to afford the corresponding products **3ab-3ae**.

**(1-Methyl-1H-imidazol-2-yl)((1R,2S,5R)-2-methyl-5-(phenylamino)cyclopentyl)methanone (3aa).**

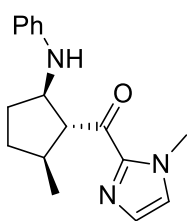

**3aa**

Following the general procedure **GPA 1**, from Michael acceptor **1a** (7.5mg, 0.05 mmol) and amine **2a** (13.3 mg, 0.1 mmol), compound **3aa** was obtained (7.1 mg, 50% yield) as a yellow solid after purification by flash column chromatography (Hex : Et<sub>2</sub>O = 80 : 20). The enantiomeric excess was determined by SFC on a *Daicel Chiralpak* IC column: CO<sub>2</sub>/MeOH isocratic 95:5 in 15 min, flow rate 3 mL/min,  $\lambda = 210$  nm,  $\tau_{\text{minor}} = 5.28$  min,  $\tau_{\text{major}} = 4.83$  min (94% ee).  $[\alpha]_{\text{D}}^{20} = -108.0$  (c = 0.56, CHCl<sub>3</sub>).

**<sup>1</sup>H-NMR** (300 MHz, CDCl<sub>3</sub>):  $\delta$  7.16 (s, 1H), 7.09 (t, *J* = 7.8 Hz, 2H), 7.00 (s, 1H), 6.71 – 6.47 (m, 3H), 3.96 (s, 3H), 3.89 – 3.69 (m, 2H), 2.58 – 2.44 (m, 1H), 2.34 – 2.18 (m, 1H), 2.06 – 1.92 (m, 1H), 1.82 – 1.66 (m, 1H), 1.65 – 1.47 (m, 1H), 1.06 (d, *J* = 6.6 Hz, 3H).

**<sup>13</sup>C-NMR** (76 MHz, CDCl<sub>3</sub>):  $\delta$  193.7, 144.3 (2C), 129.3, 129.2 (2C), 127.5, 117.6, 113.9 (2C), 61.7, 60.7, 36.8, 36.4, 33.3, 32.6, 19.4.

**HRMS (ESI):** Calculated for C<sub>17</sub>H<sub>21</sub>N<sub>3</sub>O [M + H]<sup>+</sup>: 284.1685, found 284.1689.

**((1R,2S,5R)-2-Ethyl-5-(phenylamino)cyclopentyl)(1-methyl-1H-imidazol-2-yl)methanone (3ba).**

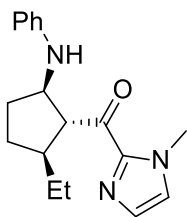

**3ba**

Following the general procedure **GPA 1**, from Michael acceptor **1b** (8.2 mg, 0.05 mmol) and amine **2a** (13.3 mg, 0.1 mmol), compound **3ba** was obtained (7.4 mg, 50% yield) as a yellow solid after purification by flash column chromatography (Hex : Et<sub>2</sub>O = 80 : 20). The enantiomeric excess was determined by SFC on a *Daicel Chiralpak* IC column: CO<sub>2</sub>/MeOH gradient from 95:5 to 60:40 in 8 min, flow rate 3 mL/min,  $\lambda = 210$  nm,  $\tau_{\text{minor}} = 3.19$  min,  $\tau_{\text{major}} = 2.96$  min (86% ee).  $[\alpha]_{\text{D}}^{20} = -115.8$  (c = 0.12, CHCl<sub>3</sub>).

**<sup>1</sup>H-NMR** (300 MHz, CDCl<sub>3</sub>):  $\delta$  7.16 (s, 1H), 7.07 (t, *J* = 7.8 Hz, 2H), 6.99 (s, 1H), 6.60 (t, *J* = 7.4 Hz, 1H), 6.50 (d, *J* = 8.0 Hz, 2H), 5.02 (brs, 1H), 3.94 (s, 3H), 3.89 – 3.74 (m, 2H), 2.46 – 2.38 (m, 1H), 2.30 – 2.25 (m, 1H), 2.10 – 1.96 (m, 1H), 1.75 – 1.67 (m, 1H), 1.61 – 1.47 (m, 2H), 1.41 – 1.29 (m, 1H), 0.86 (t, *J* = 7.4 Hz, 3H).

**<sup>13</sup>C-NMR** (75 MHz, CDCl<sub>3</sub>):  $\delta$  194.0, 144.2 (2C), 129.3 (2C), 129.1, 127.5, 117.4, 113.7 (2C), 60.9, 60.1, 43.5, 36.3, 33.3, 29.6, 28.0, 12.8.

**HRMS (ESI):** Calculated for C<sub>18</sub>H<sub>23</sub>N<sub>3</sub>O [M + H]<sup>+</sup>: 298.1841, found 298.1844.

**((1R,2R,5R)-2-Isopropyl-5-(phenylamino)cyclopentyl)(1-methyl-1H-imidazol-2-yl)methanone (3ca).**

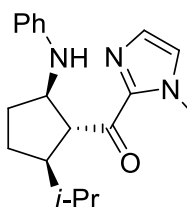

**3ca**

Following the general procedure **GPA 1**, from Michael acceptor **1c** (8.9 mg, 0.05 mmol) and amine **2a** (13.3 mg, 0.1 mmol), compound **3ca** was obtained (8.3 mg, 53% yield) as a yellow solid after purification by flash column chromatography (Hex : Et<sub>2</sub>O = 80 : 20). The enantiomeric excess was determined by SFC on a *Daicel Chiralpak* IG-3 column: CO<sub>2</sub>/MeOH gradient from 95:5 to 60:40 in 8 min, flow rate 3 mL/min,  $\lambda = 210$  nm,  $\tau_{\text{major}} = 3.21$  min,  $\tau_{\text{minor}} = 3.93$  min (89% ee).  $[\alpha]_{\text{D}}^{20} = -119.4$  (c = 0.39, CHCl<sub>3</sub>).

**<sup>1</sup>H-NMR** (300 MHz, CDCl<sub>3</sub>):  $\delta$  7.15 (d, *J* = 0.8 Hz, 1H), 7.06 (t, *J* = 7.9 Hz, 2H), 6.97 (s, 1H), 6.59 (t, *J* = 7.5 Hz, 1H), 6.48 (d, *J* = 6.7 Hz, 2H), 4.00 – 3.95 (m, 1H), 3.92 (s, 3H), 3.82 – 3.73 (m, 1H), 2.48 – 2.34 (m, 1H), 2.32 – 2.20 (m, 1H), 2.03 – 1.88 (m, 1H), 1.63 – 1.57 (m, 3H), 0.90 (d, *J* = 6.7 Hz, 3H), 0.81 (d, *J* = 6.7 Hz, 3H).

<sup>13</sup>C-NMR (75 MHz, CDCl<sub>3</sub>): δ 194.1, 147.8, 143.9, 128.9, 128.7 (2C), 127.1, 116.7, 112.9 (2C), 61.1, 57.6, 47.7, 35.9, 33.4, 32.2, 26.9, 21.4, 20.0.

HRMS (ESI): Calculated for C<sub>19</sub>H<sub>25</sub>N<sub>3</sub>O [M + H]<sup>+</sup>: 312.1998 found 312.1996.

**((1R,2R,5R)-2-Cyclohexyl-5-(phenylamino)cyclopentyl)(1-methyl-1H-imidazol-2-yl)methanone (3da).**

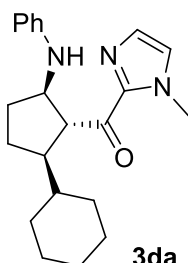

Following the general procedure **GPA 1**, from Michael acceptor **1d** (11 mg, 0.05 mmol) and amine **2a** (13.3 mg, 0.1 mmol), compound **3da** was obtained (7.6 mg, 43% yield) as a yellow solid after purification by flash column chromatography (Hex : Et<sub>2</sub>O = 80 : 20). The enantiomeric excess was determined by SFC on a *Daicel Chiralpak* IG-3 column: CO<sub>2</sub>/MeOH gradient from 95:5 to 60:40 in 8 min, flow rate 3 mL/min, λ = 210 nm, τ<sub>major</sub> = 4.09 min, τ<sub>minor</sub> = 3.38 min (89% ee). [α]<sub>D</sub><sup>20</sup> = -126.1 (c = 0.48, CHCl<sub>3</sub>).

<sup>1</sup>H-NMR (300 MHz, CDCl<sub>3</sub>): δ 7.15 (d, *J* = 0.8, 1H), 7.05 (dd, *J* = 8.5, 7.4 Hz, 2H), 6.97 (brs, 1H), 6.58 (tt, *J* = 7.3, 1.1 Hz, 1H), 6.50 – 6.42 (m, 2H), 4.93 (brs, 1H), 4.03 – 3.88 (m, 1H), 3.91 (s, 3H), 3.78 – 3.63 (m, 1H), 2.50 – 2.34 (m, 1H), 2.32 – 2.18 (m, 1H), 2.07 – 1.89 (m, 1H), 1.86 – 1.41 (m, 6H), 1.37 – 1.02 (m, 5H), 1.02 – 0.79 (m, 2H).

<sup>13</sup>C-NMR (75 MHz, CDCl<sub>3</sub>): δ 194.2, 150.6, 143.0, 129.3, 129.1 (2C), 127.5, 117.0, 113.3 (2C), 61.4, 57.8, 46.9, 42.9, 36.4, 33.8, 32.4, 31.2, 27.6, 26.7, 26.6, 26.5.

HRMS (ESI): Calculated for C<sub>22</sub>H<sub>29</sub>N<sub>3</sub>O [M + H]<sup>+</sup>: 352.2311, found 352.2313.

**((1R,2S,5R)-2-(tert-Butyl)-5-(phenylamino)cyclopentyl)(1-methyl-1H-imidazol-2-yl)methanone (3ea).**

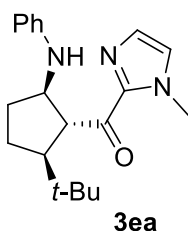

Following the general procedure **GPA 1**, from Michael acceptor **1e** (9.6 mg, 0.05 mmol) and amine **2a** (13.3 mg, 0.1 mmol), compound **3ea** was obtained (6.4 mg, 39% yield) as a yellow solid after purification by flash column chromatography (Hex : Et<sub>2</sub>O = 80 : 20). The enantiomeric excess was determined from mesilated compounds **3ea'**.

<sup>1</sup>H-NMR (300 MHz, CDCl<sub>3</sub>): δ 7.16 (d, *J* = 1.0 Hz, 1H), 7.05 (dd, *J* = 8.6, 7.3 Hz, 2H), 6.96 (d, *J* = 1.0 Hz, 1H), 6.57 (tt, *J* = 7.3, 1.1 Hz, 1H), 6.46 (dd, *J* = 8.6, 1.1 Hz, 2H), 4.09 (t, *J* = 9.3 Hz, 1H), 3.90 (s, 3H), 3.82 – 3.68 (m, 1H), 2.56 (td, *J* = 9.7, 6.8 Hz, 1H), 2.36 – 2.20 (m, 1H), 1.97 – 1.78 (m, 1H), 1.79 – 1.62 (m, 1H), 1.53 (dq, *J* = 12.3, 8.8 Hz, 1H), 0.84 (s, 9H).

<sup>13</sup>C-NMR (76 MHz, CDCl<sub>3</sub>): δ 194.7, 147.8, 144.1, 129.2, 129.1 (2C), 127.4, 117.2, 113.4 (2C), 62.3, 55.3, 51.0, 36.4, 34.3, 33.2, 27.8 (3C), 25.2.

HRMS (ESI): Calculated for C<sub>20</sub>H<sub>27</sub>N<sub>3</sub>O [M + H]<sup>+</sup>: 326.2154, found 326.2159.

***N*-((1*R*,2*R*,3*R*)-3-(*tert*-butyl)-2-((2-(1-methyl-1*H*-imidazol-2-yl)-2-oxoethyl)sulfonyl)cyclopentyl)-*N*-phenylmethanesulfonamide (**3ea'**)**

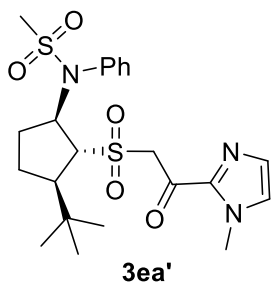

Following the general procedure **GPA 3**, from compound **3ea**, compound **3ea'** was obtained. The enantiomeric excess was determined by SFC on a *Diacel Chiralpak* IG-3 column: CO<sub>2</sub>/MeOH gradient from 95:5 to 60:40 in 8 min, flow rate 3 mL/min,  $\tau_{\text{major}} = 4.43$  min,  $\tau_{\text{minor}} = 4.15$  min (95% *ee*).  $[\alpha]_{\text{D}}^{20} = -96.1$  ( $c = 0.43$ , CHCl<sub>3</sub>).

**<sup>1</sup>H-NMR** (500 MHz, CDCl<sub>3</sub>)  $\delta$  7.72 (d,  $J = 7.4$  Hz, 2H), 7.52 – 7.43 (m, 3H), 7.29 (d,  $J = 0.9$  Hz, 1H), 7.12 (d,  $J = 0.9$  Hz, 1H), 4.76 (td,  $J = 9.2, 7.1$  Hz, 1H), 4.37 – 4.29 (m, 2H), 4.15 (d,  $J = 15.0$  Hz, 1H), 4.05 (s, 3H), 3.09 (s, 3H), 2.40 (td,  $J = 9.4, 5.6$  Hz, 1H), 2.12

– 2.02 (m, 1H), 1.78 – 1.69 (m, 1H), 1.43 – 1.32 (m, 2H), 0.68 (s, 9H).

**<sup>13</sup>C-NMR** <sup>13</sup>C NMR (75 MHz, C<sub>2</sub>D<sub>2</sub>Cl<sub>4</sub>, 353 K)  $\delta$  195.6, 144.2, 134.9, 132.9 (2C), 129.85, 129.47 (2C), 129.5, 128.0, 70.1, 67.9, 53.6, 53.1, 42.6 (3C), 36.3 (3C), 33.3, 32.2, 27.7, 25.4.

**HRMS (ESI)**: Calculated for C<sub>22</sub>H<sub>31</sub>N<sub>3</sub>O<sub>5</sub>S<sub>2</sub> [M + H]<sup>+</sup>: 481.1705, found 481.1933.

**4-Methyl-*N*-((1*R*,2*R*,3*S*)-2-(1-methyl-1*H*-imidazole-2-carbonyl)-3-phenylcyclopentyl)-*N*-phenylbenzene sulfonamide (**3fa**).**

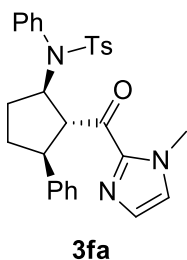

Following the general procedure **GPA 2**, from Michael acceptor **1f** (10.6 mg, 0.05 mmol) and amine **2a** (13.3 mg, 0.1 mmol), compound **3fa** was obtained (12.5 mg, 50% yield) as a yellow oil after purification by flash column chromatography (Cy : EtOAc = 80 : 20). The enantiomeric excess was determined by SFC on a *Diacel Chiralpak* ID column: CO<sub>2</sub>/MeOH gradient from 95:5 to 60:40 in 8 min, flow rate 3 mL/min,  $\lambda = 210$  nm,  $\tau_{\text{minor}} = 3.91$  min,  $\tau_{\text{major}} = 4.40$  min (94 % *ee*).  $[\alpha]_{\text{D}}^{20} = -93.1$  ( $c = 0.34$ , CHCl<sub>3</sub>).

**<sup>1</sup>H-NMR** (300 MHz, CDCl<sub>3</sub>):  $\delta$  7.49 (d,  $J = 8.3$  Hz, 2H), 7.46 – 7.38 (m, 5H), 7.16 – 6.95 (m, 9H), 5.22 – 5.05 (m, 1H), 4.53 (dd,  $J = 10.3, 9.1$  Hz, 1H), 3.92 (s, 3H), 3.64 – 3.47 (m, 1H), 2.36 (s, 3H), 2.21 – 1.97 (m, 2H), 1.93 – 1.75 (m, 1H), 1.55 – 1.36 (m, 1H).

**<sup>13</sup>C-NMR** (76 MHz, CDCl<sub>3</sub>):  $\delta$  193.8, 143.9, 142.9, 142.8, 138.1, 135.8, 133.1 (2C), 129.3, 129.2 (4C), 129.0, 128.4 (2C), 127.6 (2C), 127.3, 127.2 (2C), 126.4, 65.0, 57.4, 48.6, 36.2, 32.7, 30.1, 21.6.

**HRMS (ESI)**: Calculated for C<sub>29</sub>H<sub>29</sub>N<sub>3</sub>O<sub>3</sub>S [M + H]<sup>+</sup>: 500.1930, found 500.1933.

***N*-((1*R*,2*R*,3*S*)-3-(4-Bromophenyl)-2-(1-methyl-1*H*-imidazole-2-carbonyl)cyclopentyl)-4-methyl-*N*-phenylbenzenesulfonamide (**3ga**).**

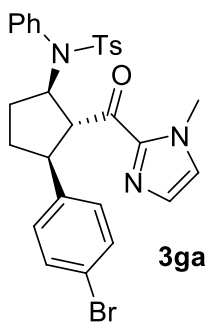

Following the general procedure **GPA 2**, from Michael acceptor **1g** (14.6 mg, 0.05 mmol) and amine **2a** (13.3 mg, 0.1 mmol), compound **3ga** was obtained (11 mg, 38% yield) as a yellow oil after purification by flash column chromatography (Cy : EtOAc = 85 : 15). The enantiomeric excess was determined by SFC on a *Diacel Chiralpak* ID column: CO<sub>2</sub>/MeOH gradient from 95:5 to 60:40 in 8 min, flow rate 3 mL/min,  $\lambda = 210$  nm,  $\tau_{\text{major}} = 4.89$  min,  $\tau_{\text{minor}} = 4.42$  min (91% *ee*).  $[\alpha]_{\text{D}}^{20} = -77.6$  ( $c = 0.46$ , CHCl<sub>3</sub>).

**<sup>1</sup>H-NMR** (300 MHz, CDCl<sub>3</sub>):  $\delta$  7.47 (d,  $J = 8.2$  Hz, 2H), 7.40 (s, 5H), 7.22 (d,  $J = 8.4$  Hz, 2H), 7.12 (d,  $J = 8.3$  Hz, 2H), 7.11 (s, 1H), 7.00 (s, 1H), 6.87 (d,  $J = 8.4$  Hz, 2H), 5.11 (q,  $J = 8.3$

Hz, 1H), 4.49 (t,  $J = 9.6$  Hz, 1H), 3.93 (s, 3H), 3.49 (q,  $J = 9.1$  Hz, 1H), 2.36 (s, 3H), 2.16 – 1.94 (m, 2H), 1.93 – 1.74 (m, 1H), 1.45 – 1.31 (m, 1H).

$^{13}\text{C-NMR}$  (75 MHz,  $\text{CDCl}_3$ ):  $\delta$  193.5, 143.8, 142.9, 141.9, 138.0, 135.7, 133.1 (2C), 131.5 (2C), 129.4, 129.3 (2C), 129.2 (2C), 129.04, 128.99 (2C), 127.6 (2C), 127.5, 120.1, 64.8, 57.3, 48.0, 36.2, 32.6, 30.0, 21.6.

**HRMS (ESI):** Calculated for  $\text{C}_{29}\text{H}_{28}\text{BrN}_3\text{O}_3\text{S}$  [ $\text{M} + \text{H}$ ] $^+$ : 578.1035, found 578.1038.

#### 4-Methyl-*N*-((1*R*,2*R*,3*S*)-2-(1-methyl-1*H*-imidazole-2-carbonyl)-3-(4-nitrophenyl)cyclopentyl)-*N*-phenyl benzenesulfonamide (**3ha**).

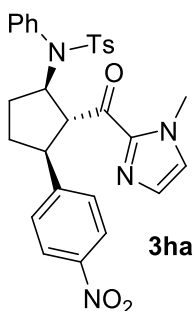

Following the general procedure **GPA 2**, from Michael acceptor **1h** (12.9 mg, 0.05 mmol) and amine **2a** (13.3 mg, 0.1 mmol), compound **3ha** was obtained (9.8 mg, 36% yield) as a yellow oil after purification by flash column chromatography (Cy : EtOAc = 85 : 15). The enantiomeric excess was determined by SFC on a *Daiel Chiralpak* ID column:  $\text{CO}_2/\text{MeOH}$  gradient from 95:5 to 60:40 in 8 min, flow rate 3 mL/min,  $\lambda = 210$  nm,  $\tau_{\text{minor}} = 4.90$  min,  $\tau_{\text{major}} = 5.37$  min (93% ee).  $[\alpha]_{\text{D}}^{20} = -52.7$  ( $c = 0.64$ ,  $\text{CHCl}_3$ ).

$^1\text{H-NMR}$  (300 MHz,  $\text{CDCl}_3$ ):  $\delta$  7.97 (d,  $J = 8.8$  Hz, 2H), 7.48 (d,  $J = 8.2$  Hz, 2H), 7.44 – 7.33 (m, 5H), 7.18 – 7.09 (m, 5H), 7.02 (s, 1H), 5.15 (q,  $J = 8.4$  Hz, 1H), 4.56 (t,  $J = 9.5$  Hz, 1H), 3.95 (s, 3H), 3.69 – 3.56 (m, 1H), 2.37 (s, 3H), 2.20 – 2.03 (m, 2H), 1.93 – 1.79 (m, 1H), 1.53 – 1.40 (m, 1H).

$^{13}\text{C-NMR}$  (76 MHz,  $\text{CDCl}_3$ ):  $\delta$  192.9, 150.8, 146.7, 143.7, 143.0, 137.9, 135.7, 133.1 (2C), 129.6, 129.35 (2C), 129.31 (2C), 129.2, 128.1 (2C), 127.73, 127.65 (2C), 123.8 (2C), 64.7, 57.2, 48.3, 36.2, 32.4, 30.2, 21.6.

**HRMS (ESI):** Calculated for  $\text{C}_{29}\text{H}_{28}\text{N}_4\text{O}_5\text{S}$  [ $\text{M} + \text{H}$ ] $^+$ : 545.1780, found 545.1783.

#### ((1*R*,2*R*,5*S*)-2-((4-Chlorophenyl)amino)-5-methylcyclopentyl)(1-methyl-1*H*-imidazol-2-yl)methanone (**3ab**)

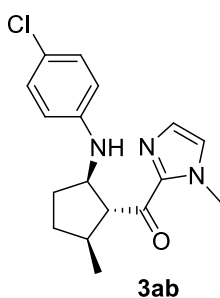

Following the general procedure **GPB**, from Michael acceptor **1a** (7.5mg, 0.05 mmol) and amine **2b** (16.7 mg, 0.1 mmol), compound **3ab** was obtained (6.7 mg, 42% yield) as a yellow solid after purification by flash column chromatography (Cy : EtOAc = 60 : 40). The enantiomeric excess was determined, by SFC on a *Daiel Chiralpak* IA column:  $\text{CO}_2/\text{MeOH}$  gradient from 95:5 to 60:40 in 8 min, flow rate 2 mL/min,  $\lambda = 210$  nm,  $\tau_{\text{minor}} = 5.02$  min,  $\tau_{\text{major}} = 4.71$  min (92% ee).  $[\alpha]_{\text{D}}^{20} = -94.9$  ( $c = 0.29$ ,  $\text{CHCl}_3$ ).

$^1\text{H-NMR}$  (300 MHz,  $\text{CDCl}_3$ ):  $\delta$  7.15 (d,  $J = 1.0$  Hz, 1H), 7.06 – 6.97 (m, 3H), 6.44 (d,  $J = 8.5$  Hz, 2H), 3.96 (s, 3H), 3.85 – 3.63 (m, 2H), 2.49 (tt,  $J = 9.7, 6.8$  Hz, 1H), 2.31 – 2.16 (m, 1H), 2.07 – 1.91 (m, 1H), 1.78 – 1.62 (m, 1H), 1.61 – 1.45 (m, 1H), 1.05 (d,  $J = 6.6$  Hz, 3H).

$^{13}\text{C-NMR}$  (75 MHz,  $\text{CDCl}_3$ ):  $\delta$  193.5, 146.5, 144.2, 129.3, 128.9 (2C), 127.6, 122.2, 114.9 (2C), 61.7, 60.7, 36.9, 36.4, 33.2, 32.5, 19.4.

**HRMS (ESI):** Calculated for  $\text{C}_{17}\text{H}_{20}\text{ClN}_3\text{O}$  [ $\text{M} + \text{H}$ ] $^+$ : 318.1295, found 318.1295.

**((1*R*,2*R*,5*S*)-2-((3,5-bis(Trifluoromethyl)phenyl)amino)-5-methylcyclopentyl)(1-methyl-1*H*-imidazol-2-yl)methanone (**3ac**).**

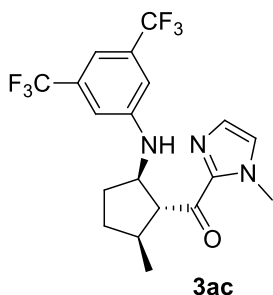

Following the general procedure **GPB**, from Michael acceptor **1a** (7.5mg, 0.05 mmol) and amine **2c** (26.9 mg, 0.1 mmol) compound **3ac** was obtained (7 mg, 33% yield) as a yellow oil after purification by flash column chromatography (Cy : EtOAc = 90 : 10). The enantiomeric excess was determined, after mesylation, by SFC on a *Daicel Chiralpak* IB-3 column: CO<sub>2</sub>/MeOH gradient from 95:5 to 70:30 in 8 min, flow rate 2 mL/min, λ = 210 nm, τ<sub>major</sub> = 0.93 min, τ<sub>minor</sub> = 1.06 min (80% ee). [α]<sub>D</sub><sup>20</sup> = - 111.3 (c = 0.41, CHCl<sub>3</sub>).

**<sup>1</sup>H-NMR** (300 MHz, CDCl<sub>3</sub>): δ 7.18 (s, 1H), 7.04 (s, 1H), 7.02 (s, 1H), 6.79 (s, 2H), 5.76 (brs, 1H), 3.98 (s, 3H), 3.89 – 3.70 (m, 2H), 2.61 – 2.47 (m, 1H), 2.41 – 2.25 (m, 1H), 2.11 – 1.97 (m, 1H), 1.77 – 1.63 (m, 1H), 1.61 – 1.46 (m, 1H), 1.06 (d, *J* = 6.5 Hz, 3H).

**<sup>13</sup>C-NMR** (75 MHz, CDCl<sub>3</sub>): δ 193.0, 148.8, 143.9, 132.3 (q, *J* = 32.6 Hz, 2C), 129.2, 127.8, 123.7 (q, *J* = 272.5 Hz, 2C), 112.3 (q, *J* = 4.4 Hz, 2C), 109.8 (p, *J* = 4.2 Hz), 61.5, 59.8, 36.8, 36.5, 33.0, 32.3, 19.3.

**<sup>19</sup>F NMR** (471 MHz, CDCl<sub>3</sub>) δ - 63.15.

**HRMS (ESI):** Calculated for C<sub>19</sub>H<sub>19</sub>F<sub>6</sub>N<sub>3</sub>O [M + H]<sup>+</sup>: 420.1432, found 420.1437.

**((1*R*,2*R*,5*S*)-2-((4-(*tert*-Butyl)phenyl)amino)-5-methylcyclopentyl)(1-methyl-1*H*-imidazol-2-yl)methanone (**3ad**).**

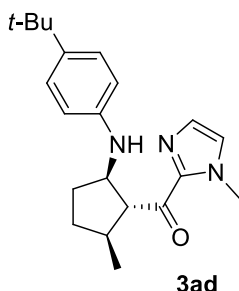

Following the general procedure **GPB**, from Michael acceptor **1a** (7.5mg, 0.05 mmol) and amine **2d** (18.9 mg, 0.1 mmol), compound **3ad** was obtained (10.8 mg, 33% yield) as an orange solid after purification by flash column chromatography (Cy : EtOAc = 60 : 40). The enantiomeric excess was determined by SFC on a *Daicel Chiralpak* IA column: CO<sub>2</sub>/MeOH gradient from 95 : 5 to 60 : 40 in 8 min, flow rate 2 mL/min, λ = 210 nm, τ<sub>minor</sub> = 4.35 min, τ<sub>major</sub> = 4.69 min (87% ee). [α]<sub>D</sub><sup>20</sup> = - 235 (c = 0.04, CHCl<sub>3</sub>).

**<sup>1</sup>H-NMR** (300 MHz, CDCl<sub>3</sub>): δ 7.15 (d, *J* = 1.0 Hz, 1H), 7.12 (d, *J* = 8.7 Hz, 2H), 6.98 (d, *J* = 1.0 Hz, 1H), 6.49 (d, *J* = 8.3 Hz, 2H), 3.94 (s, 3H), 3.87 – 3.67 (m, 2H), 2.51 (tt, *J* = 9.8, 6.8 Hz, 1H), 2.25 (dq, *J* = 12.8, 7.9 Hz, 1H), 2.04 – 1.91 (m, 1H), 1.81 – 1.66 (m, 1H), 1.63 – 1.48 (m, 1H), 1.23 (s, 9H), 1.05 (d, *J* = 6.6 Hz, 3H).

**<sup>13</sup>C-NMR** (76 MHz, CDCl<sub>3</sub>): δ 193.9, 146.0, 144.4, 139.8, 129.3, 127.4, 125.9 (2C), 113.1 (2C), 61.8, 60.6, 36.8, 36.4, 33.9, 33.8, 32.6, 31.7 (3C), 19.4.

**HRMS (ESI):** Calculated for C<sub>21</sub>H<sub>29</sub>N<sub>3</sub>O [M + H]<sup>+</sup>: 340.2311, found 340.2312.

**(1-Methyl-1*H*-imidazol-2-yl)((1*R*,2*S*,5*R*)-2-methyl-5-(naphthalen-1-ylamino)cyclopentyl)methanone (**3ae**).**

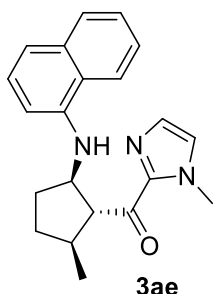

Following the general procedure **GPB**, from Michael acceptor **1a** (7.5mg, 0.05 mmol) and amine **2e** (18.3 mg, 0.1 mmol), compound **3ae** was obtained (8.4 mg, 50% yield) as a red-orange oil after purification by flash column chromatography (Cy : EtOAc = 50 : 50). The enantiomeric excess was determined by SFC on a *Daicel Chiralpak* IC column: CO<sub>2</sub>/MeOH gradient from 95 : 5 to 60 : 40 in 8 min, flow rate 3 mL/min,  $\lambda = 210$  nm,  $\tau_{\text{minor}} = 4.03$  min,  $\tau_{\text{major}} = 3.91$  min (83% ee).  $[\alpha]_{\text{D}}^{20} = -267.9$  ( $c = 0.08$ , CHCl<sub>3</sub>).

**<sup>1</sup>H-NMR** (300 MHz, CDCl<sub>3</sub>): 1H NMR (300 MHz, DMSO)  $\delta$  8.13 – 8.00 (m, 1H), 7.77 – 7.67 (m, 1H), 7.45 – 7.38 (m, 2H), 7.29 – 7.22 (m, 1H), 7.19 (d,  $J = 1.0$  Hz, 1H), 7.13 (d,  $J = 8.1$  Hz, 1H), 6.96 (d,  $J = 1.0$  Hz, 1H), 6.40 (d,  $J = 7.5$  Hz, 1H), 3.96 (s, 3H), 3.89 – 3.79 (m, 1H), 2.73 – 2.54 (m, 1H), 2.51 – 2.33 (m, 1H), 2.04 (dtd,  $J = 11.5, 7.4, 3.6$  Hz, 1H), 1.83 (ddt,  $J = 13.0, 9.0, 4.5$  Hz, 1H), 1.71 – 1.51 (m, 2H), 1.10 (d,  $J = 6.5$  Hz, 3H).

**<sup>13</sup>C-NMR** (75 MHz, CDCl<sub>3</sub>):  $\delta$  193.3, 144.3, 143.9, 134.4, 129.4, 128.5, 127.6, 126.6, 125.7, 124.4, 123.8, 121.2, 116.8, 104.7, 61.6, 60.1, 36.3, 36.1, 33.5, 32.9, 19.1.

**HRMS (ESI)**: Calculated for C<sub>21</sub>H<sub>23</sub>N<sub>3</sub>O [M + H]<sup>+</sup>: 334.1841, found 334.1844.



## 6. Synthetic playground information.

### a) Oxidation with CAN

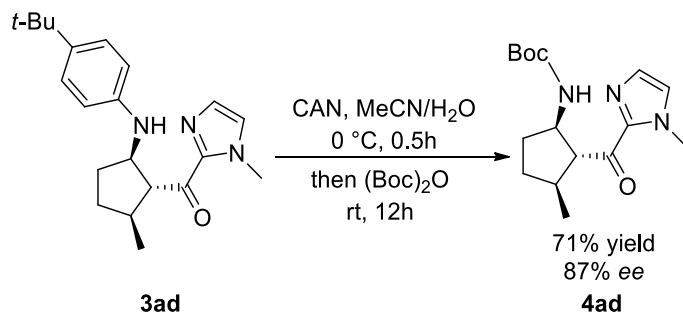

To a solution of ceric ammonium nitrate (CAN) (69 mg, 0.125 mmol, 2.50 equiv) in H<sub>2</sub>O (0.5 mL) was added a solution of **3ad** (17 mg, 0.05 mmol, 1.00 equiv) in MeCN (0.5 mL) dropwise slowly at 0 °C. After being stirred for 30 min, (Boc)<sub>2</sub>O (80 μL, 0.35 mmol, 7.00 equiv) was added and the reaction mixture was stirred for 12 h at room temperature. The resulting reddish-brown solution was diluted with water, neutralized with NaHCO<sub>3</sub> saturated solution, and extracted with EtOAc twice. The combined organic extracts were dried over Na<sub>2</sub>SO<sub>4</sub> and filtered. After concentration, the residue was purified by column chromatography on silica gel (Cy : EtOAc = 65 : 35) to give **4ad** (11 mg, 0.036 mmol, 71% yield) as a yellow solid. The enantiomeric excess was determined by SFC on a *Daicel Chiralpak* IC column: CO<sub>2</sub>/MeOH gradient from 95:5 to 60:40 in 8 min, flow rate 3 mL/min, λ = 210 nm, τ<sub>major</sub> = 2.46 min, τ<sub>minor</sub> = 2.69 min (87% ee). [α]<sub>D</sub><sup>20</sup> = -61.3 (c = 0.13, CHCl<sub>3</sub>).

**<sup>1</sup>H-NMR** (300 MHz, CDCl<sub>3</sub>, 323 K) δ 7.14 (s, 1H), 7.01 (s, 1H), 4.10 – 3.94 (m, 3H), 4.03 (s, 3H), 3.69 (t, J = 9.4 Hz, 1H), 2.54 – 2.39 (m, 1H), 2.31 – 2.15 (m, 1H), 2.03 – 1.88 (m, 1H), 1.74 – 1.54 (m, 1H), 1.53 – 1.36 (m, 1H), 1.28 (s, 9H), 1.04 (d, J = 6.7 Hz, 3H).

**<sup>13</sup>C-NMR** (126 MHz, CDCl<sub>3</sub>) δ 193.5, 155.6, 144.2, 128.7, 127.1, 79.0, 61.4, 57.5, 37.2, 36.4, 32.6, 31.6, 28.3 (3C), 19.7.

**HRMS (ESI):** Calculated for C<sub>16</sub>H<sub>25</sub>N<sub>3</sub>O<sub>3</sub> [M + H]<sup>+</sup> : 308.1896, found 308.1899.

### b) Reduction with NaBH<sub>4</sub>

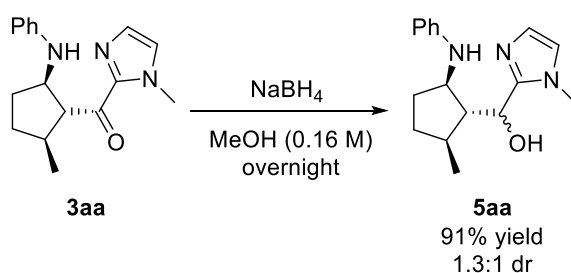

To a solution of **3aa** (14.5 mg, 0.05 mmol, 1 equiv) in MeOH (0.3 mL) was added portionwise NaBH<sub>4</sub> (5 mg, 0.125 mmol, 2.5 equiv) and the mixture was stirred at room temperature for 1.5h under N<sub>2</sub>. After reaction completion, the solution was diluted with water, neutralized with NaHCO<sub>3</sub> saturated solution, and extracted with EtOAc twice, filtered, dried over MgSO<sub>4</sub> and vacuumed. The product **5aa** was obtained (12.8 mg, 0.045 mmol, 91% yield) as a light-yellow solid with a diastereomeric ratio of (1.3:1) without further purification.

**<sup>1</sup>H NMR** (300 MHz, CDCl<sub>3</sub>): δ 7.21 – 7.07 (m, 4H, major+minor), 6.93 (dd, *J* = 6.0, 1.2 Hz, 2H, major), 6.83 – 6.51 (m, 8H, major+minor), 5.46 – 5.29 (m, 1H, minor), 4.87 (t, *J* = 6.5 Hz, 1H, major), 3.87 – 3.74 (m, 2H, major+minor), 3.70 (s, 3H, major), 3.54 (s, 3H, minor), 2.26 – 1.95 (m, 7H, major+minor), 1.95 – 1.76 (m, 4H, major+minor), 1.69 – 1.47 (m, 3H, major+minor), 0.85 (d, *J* = 6.6 Hz, 3H, minor), 0.73 (d, *J* = 6.0 Hz, 3H, major).

**<sup>13</sup>C-NMR** (76 MHz, CDCl<sub>3</sub>): δ 149.7, 149.0, 147.9, 147.3, 129.3 (2C), 129.2 (2C), 124.3, 123.6, 121.8, 121.6, 118.6, 117.4, 114.9 (2C), 113.5 (2C), 68.7, 67.9, 59.7, 58.9, 58.2, 58.1, 35.7, 34.5, 33.9, 32.8, 32.6, 32.2, 31.8, 27.0, 21.7, 19.7.

**HRMS (ESI)**: Calculated for C<sub>17</sub>H<sub>23</sub>N<sub>3</sub>O [M + H]<sup>+</sup>: 286.1841, found 286.1843.

## 7. UV-Vis Absorption spectra.

The absorption spectra of acetone solutions of **1a**, **2a**,  $\Delta$ -Rh complex initial, and the complex Rh-I at the concentration of the reaction was measured using a quartz cuvette with 0,1 cm of optical pathway (Figure S2).

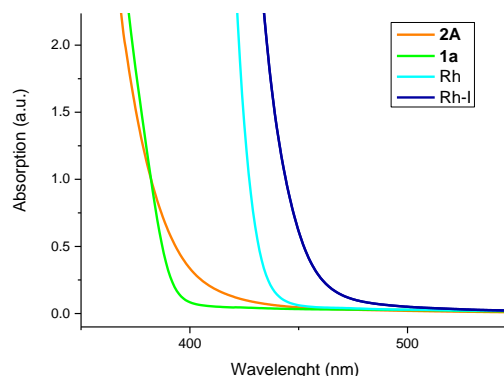

Figure S2. Absorption spectra of **1a**, **2A**, Rh complex and Rh-I complex in acetone.

## 8. Quantum Yield determination.

A solution of ferrioxalate was chosen as actinometer following the procedure described by the IUPAC (subcommittee on photochemistry).<sup>[11]</sup> The procedure is based on the decomposition under irradiation of ferric ions to ferrous ions which are complexed by 1,10-phenanthroline. This photochemical transformation has a known quantum yield and the complexation of  $\text{Fe}^{2+}$  with 1,10-phenanthroline can be monitored by UV-Visible absorption since its extinction coefficient at 510 nm is known ( $\epsilon = 11100 \text{ M}^{-1} \text{ cm}^{-1}$ ). Therefore, the moles transformed can be related with the moles of photons absorbed by the equation [eq. 1].

$$\Phi = \frac{\text{mol transformed}}{\text{photons absorbed}} \quad [\text{eq. 1}]$$

The complete procedure should be done under a red safe-light environment. At 465 nm ferrioxalate has a  $\Phi = 0.85$ .<sup>[12]</sup> 0.006, 0.012, or 0.15 M solutions of  $\text{K}_3[\text{Fe}(\text{C}_2\text{O}_4)_3] \cdot 3\text{H}_2\text{O}$  can be used for actinometry. In this case, we chose a concentration of 0.15 M. The solutions were prepared and stored in a dark laboratory:

1. Potassium ferrioxalate solution (0.15 M): 368.4 mg of  $\text{K}_3[\text{Fe}(\text{C}_2\text{O}_4)_3] \cdot 3\text{H}_2\text{O}$  (commercially available) and 26.6  $\mu\text{L}$  of  $\text{H}_2\text{SO}_4$  were added into a 5 mL volumetric flask and filled to the mark with Milli-Q water.
2. Phenanthroline solution (0.15 M): 1.35 g of 1,10-phenanthroline monohydrate were added to 50 mL volumetric flask and filled to the mark with MilliQ water.
3. Buffer solution: 4.94 g of NaOAc and 1 mL of  $\text{H}_2\text{SO}_4$  were added to 100 mL volumetric flask and filled to the mark with MilliQ water.
4. Model reaction solution: An oven-dried 6 mL vial equipped with a magnetic stirring bar was charged with the Michael acceptor **1a** (0.05 mmol), *N*-cyclopropylaniline (**2a**) (2.0 equiv.) and  $\Delta$ -Rh cat. (5 mol%). Then, 150  $\mu\text{L}$  of acetone were added. The vial was closed with PTFE/rubber septum. The reaction was irradiated and stirred in the photoreactor setup under 465 nm LED irradiation (22.0216  $\text{W}/\text{m}^2$  intensity; approximate distance was 2 cm from the vial) at 20 °C.

**Actinometry procedure:** Due to the reactor setup (see Figure S1), the simultaneous irradiation of both the actinometer solution and model reaction is not feasible. However, the stability of the irradiation light was checked through radiometer measurements (from spectro-radiometer equipment Stellarnet model Blue-Wave UV-NB50). Therefore, we assumed that consecutive measurements of both actinometer and model reaction are comparable. In addition, using the same spectrometer, the LED source spectrum was measured, detecting a maximum wavelength of emission of 465 nm (see Figure S1).

2 mL of Potassium ferrioxalate solution (0.15 M) were introduced into the photoreactor under dark conditions while being stirred. Then, the LED was switched on. Every 5 s the light was switched off and a 0.1 mL aliquot was taken. To each aliquot, 2 mL of buffer solution and 0.5 mL of 1,10-phenanthroline 0.15 M were added and the final volume was raised to 10 mL with MilliQ water. Then 83  $\mu\text{L}$  of this solution were diluted to 5 mL with MilliQ water. As a blank sample, a solution was prepared with 0.1 mL of potassium ferrioxalate solution (0.15 M) before irradiation, 2 mL of buffer solution and 0.5 mL of 1,10-phenanthroline 0.15 M in a 10 mL of volumetric flask filled with water until the mark, and 83  $\mu\text{L}$  of this solution were diluted to 5 mL with MilliQ water. The absorbance spectrum of each sample was monitored at 510 nm. The absorbance to each time was related with the photochemically produced  $\text{Fe}^{2+}$  ions across the Lambert-Beer Law (eq 2), where  $V_1$  is the irradiated volume (noting that the initial volume is 2 mL but it changes as the aliquots are taken);  $V_2$  is the aliquot volume (0.1 mL),  $V_3$  is the final volume after addition of 1,10-phenanthroline and buffer (10 mL).  $b$  is referred to the optical pathway (1 cm),  $\Delta A$  (510 nm) is the difference in absorbance between the irradiated solution and the blank sample,  $\epsilon$  (510 nm) is the extinction coefficient of the complex formed by Fe(II) and 1,10-phenanthroline (ca.  $11100 \text{ M}^{-1} \text{ cm}^{-1}$ ).

$$\text{moles of } \text{Fe}^{2+} = \frac{V_1 \cdot V_3 \cdot \Delta A_{(510 \text{ nm})}}{10^3 \cdot V_2 \cdot b \cdot \epsilon_{(510 \text{ nm})}} \quad [\text{eq. 2}]$$

The moles of  $\text{Fe}^{2+}$  formed ( $x$ ) are plotted as a function of time ( $t$ ) (Figure S3).

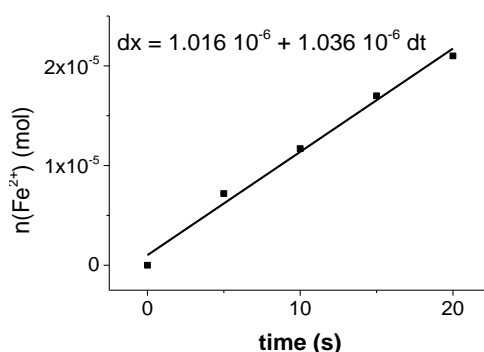

**Figure S3.** Actinometer.

The slope of this line ( $dx/dt$ ) was correlated to the moles of incident photons by unit of time ( $q_{n,p}^0$ ) using the following [eq.3]:

$$q_{n,p}^0 = \frac{dx/dt}{\Phi_{(\lambda)} \cdot [1 - 10^{-A(\lambda)}]} \quad [\text{eq. 3}]$$

Where  $\Phi_{(\lambda)}$  is the quantum yield of the actinometer reaction at the irradiated wavelength, in this case being 0.85 at 465 nm for 0.15 M dilution<sup>[12]</sup> and  $A_{(\lambda)}$  is the absorbance of the actinometer solution (ferrioxalate) at the irradiated wavelength (465 nm). The absorbance at 465 nm was measured with an Agilent 8453 UV-visible Spectroscopy System using a quartz cuvette with 1 cm of optical pathway.

Therefore, the moles of incident photons by unit of time ( $q_{n,p}^0$ ) was determined as  $1.036 \cdot 10^{-5}$  einstein  $s^{-1}$ .

**The kinetics of the reaction under study were done as follows:** the photoreactor (blue LEDs) was switched on and the reaction mixture was stirred. At 12, 24, 36 and 48 minutes an aliquot of 0.05 mL were taken from the reaction mixture under a positive flow of nitrogen, the solvent evaporated under reduced pressure, and the crude diluted with 0.4 mL of  $CDCl_3$ . Thus, the conversion of the reaction at the different indicated time was determined by  $^1H$ -NMR. Knowing the initial molar concentration, the determination of the moles of photo-converted product is possible.

Plotting the moles of product versus the irradiation time (Figure S4), the slope  $dx/dt$  can be related with the quantum yield across the [eq.3] being equal to time ( $q_{n,p}^0$ )  $\Phi_{(\lambda)} \cdot [1-10^{-A(\lambda)}]$ . Therefore, the quantum yield at the wavelength of irradiation  $\Phi$  (465 nm) can be calculated once  $A$  (465 nm) is determined. To measure  $A$  (465 nm), a model reaction solution was added to a 1 mm optical pathway cuvette and the UV-Visible spectrum was recorded obtaining an absorbance of 0.95.

Therefore, the quantum yield for the reaction is:  $\Phi = 0.031 = 3.1\%$ .

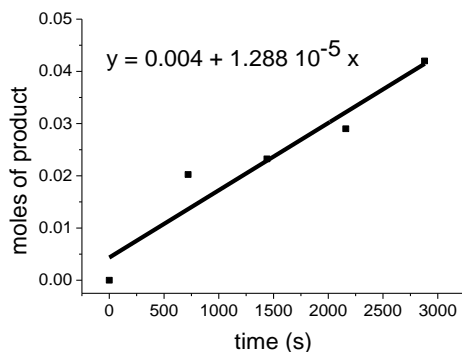

**Figure S4.** Kinetic of the reaction.

## 9. NMR Spectra section.

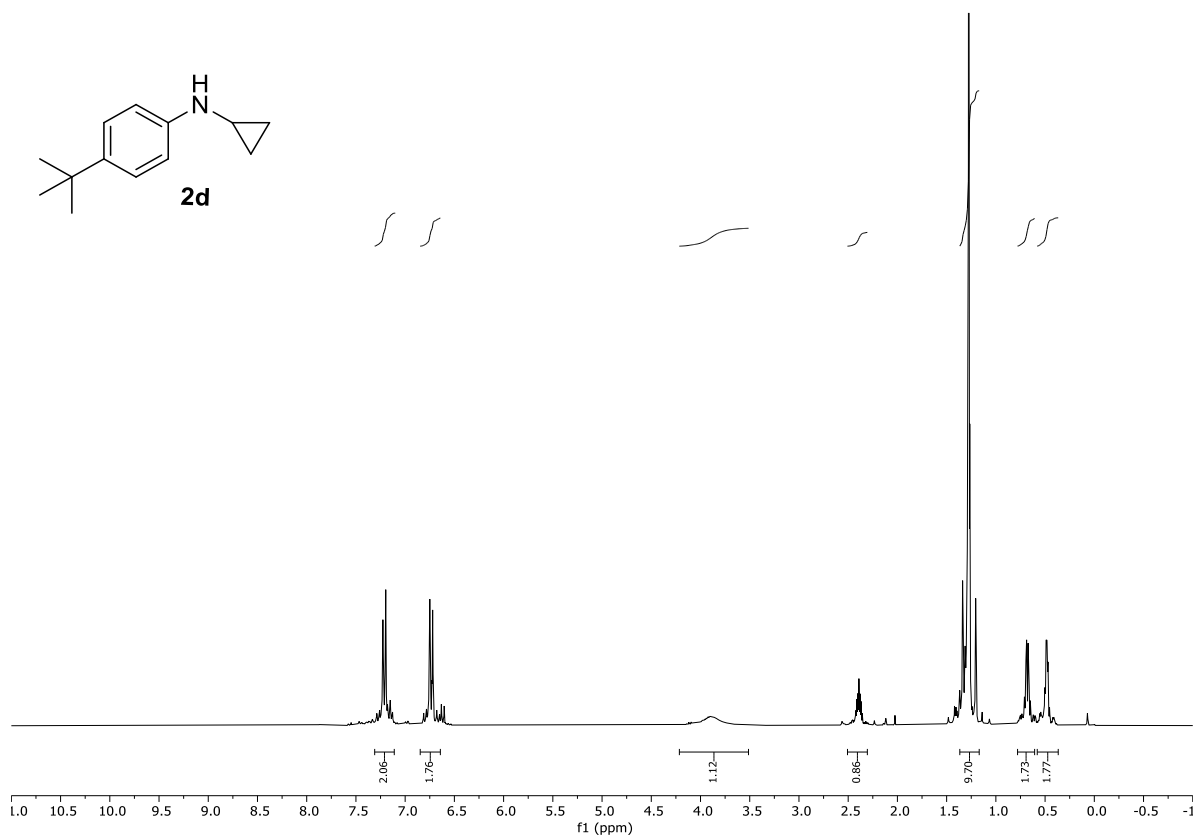

Figure S5. <sup>1</sup>H NMR spectrum (300 MHz, 298K, CDCl<sub>3</sub>) of **2d**.

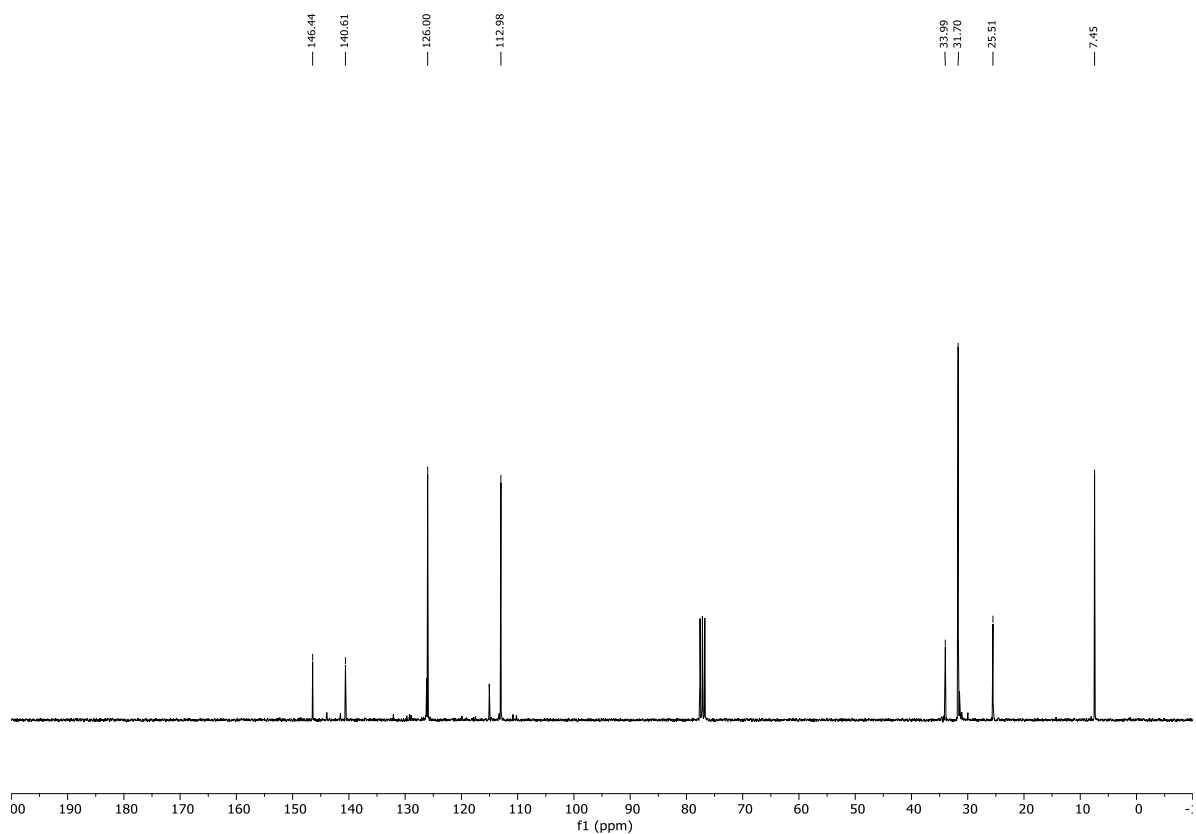

Figure S6. <sup>13</sup>C NMR spectrum (75 MHz, 298K, CDCl<sub>3</sub>) of **2d**.

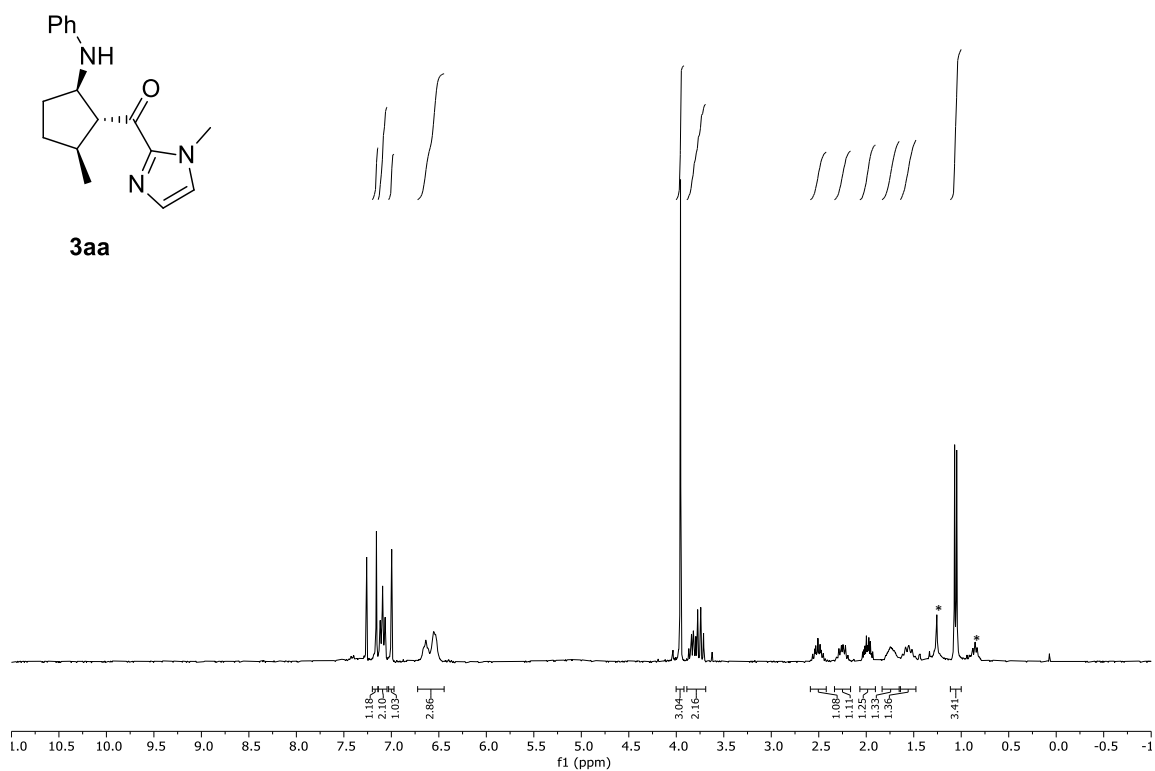

**Figure S7.**  $^1\text{H}$  NMR spectrum (300 MHz, 298K,  $\text{CDCl}_3$ ) of **3aa**. (\*Grease peaks)

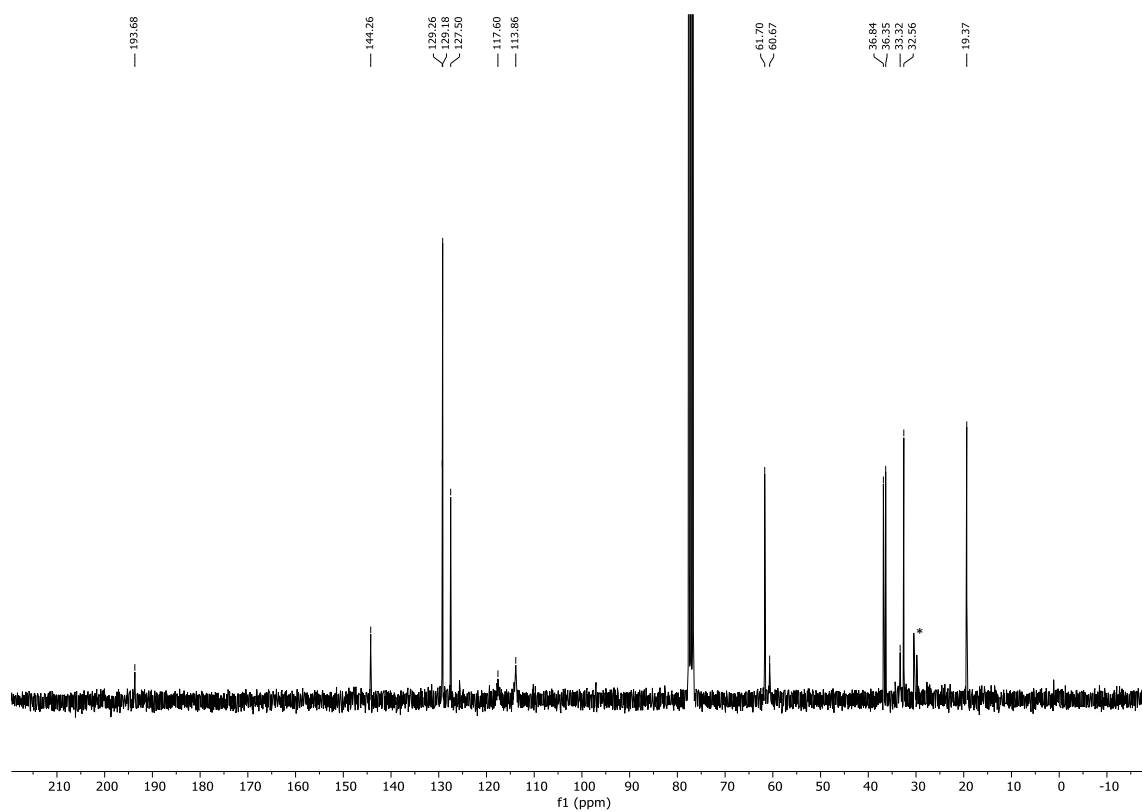

**Figure S8.**  $^{13}\text{C}$  NMR spectrum (75 MHz, 298K,  $\text{CDCl}_3$ ) of **3aa**. (\*Grease peak)

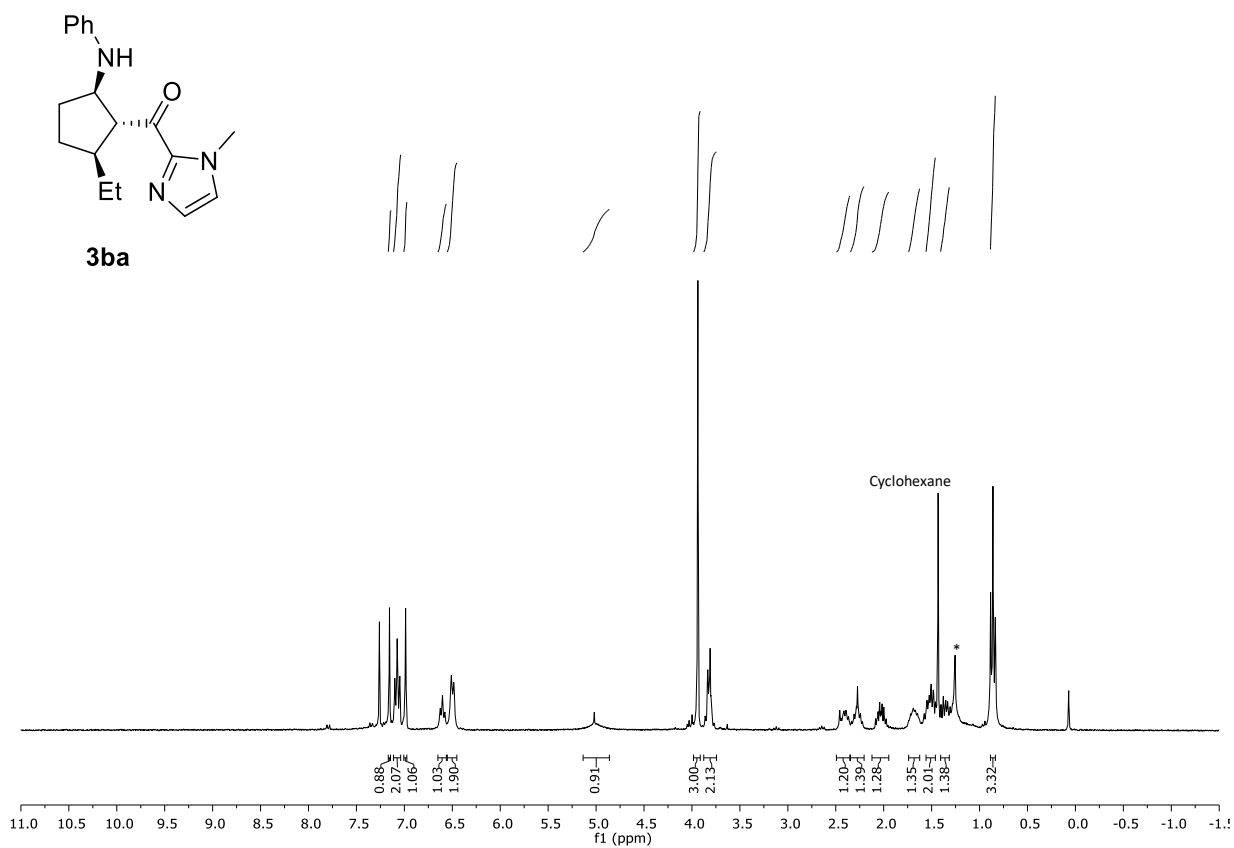

**Figure S9.**  $^1\text{H}$  NMR spectrum (300 MHz, 298K,  $\text{CDCl}_3$ ) of **3ba** (\*Grease peak).

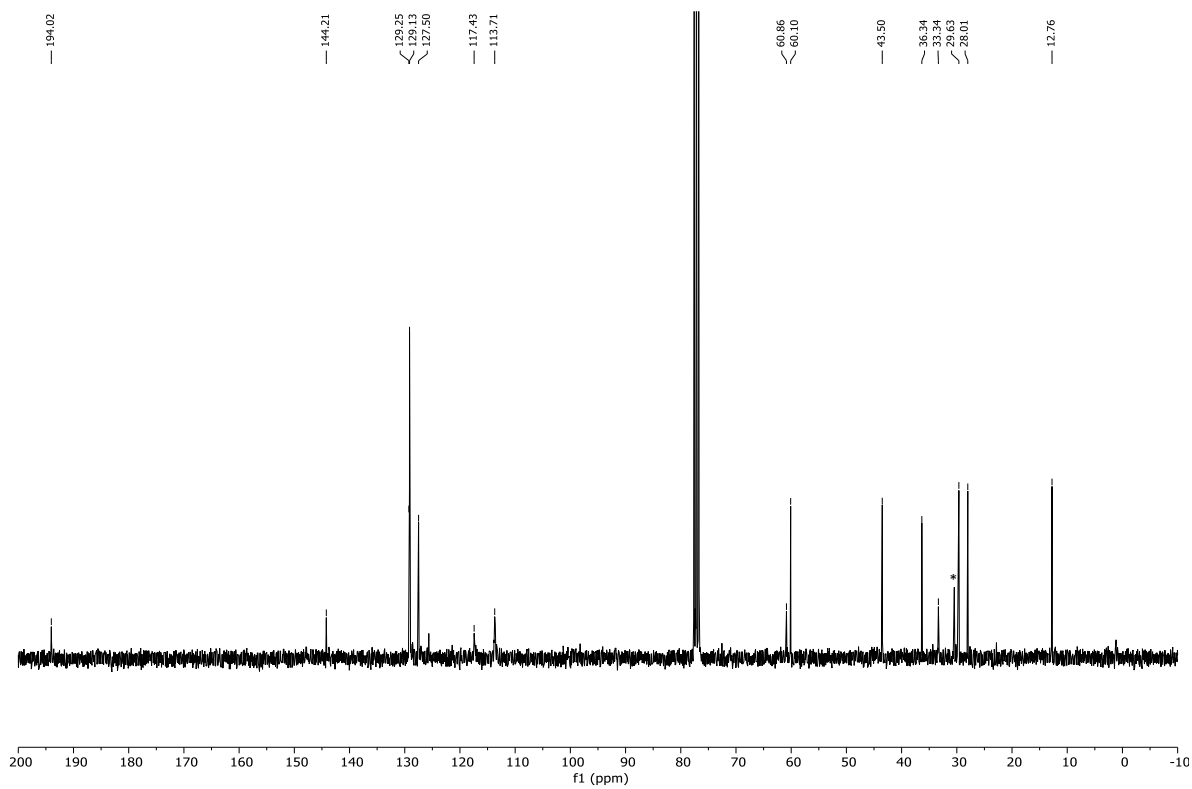

**Figure S10.**  $^{13}\text{C}$  NMR spectrum (75 MHz, 298K,  $\text{CDCl}_3$ ) of **3ba** (\*Grease peak).



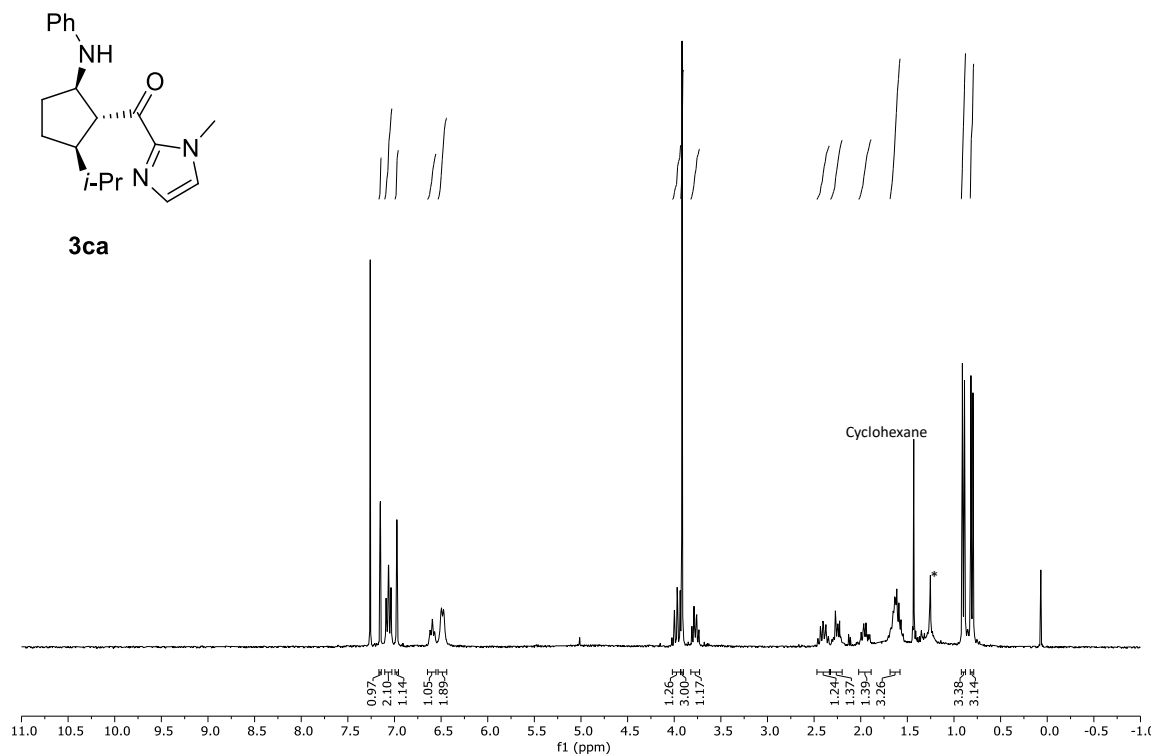

**Figure S11.**  $^1\text{H}$  NMR spectrum (300 MHz, 298K,  $\text{CDCl}_3$ ) of **3ca** (\*Grease peak).

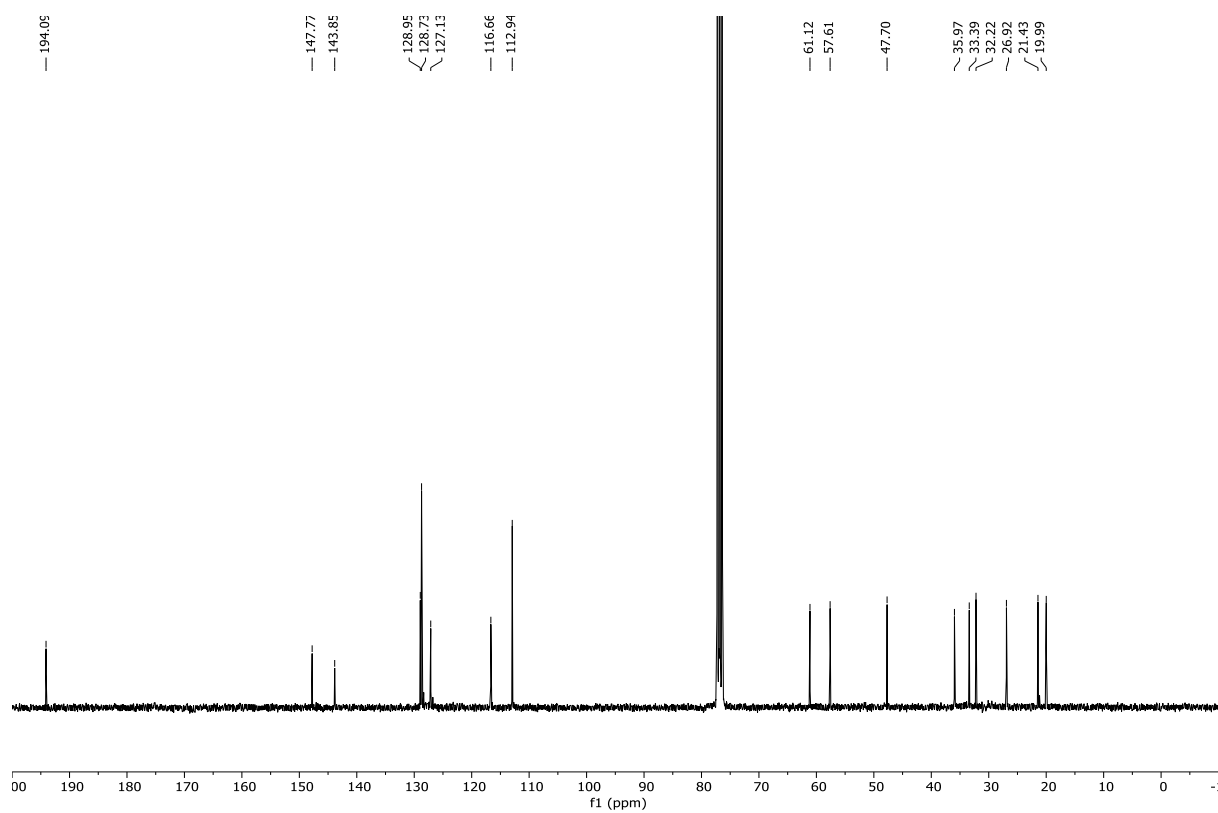

**Figure S12.**  $^{13}\text{C}$  NMR spectrum (75 MHz, 298K,  $\text{CDCl}_3$ ) of **3ca**.

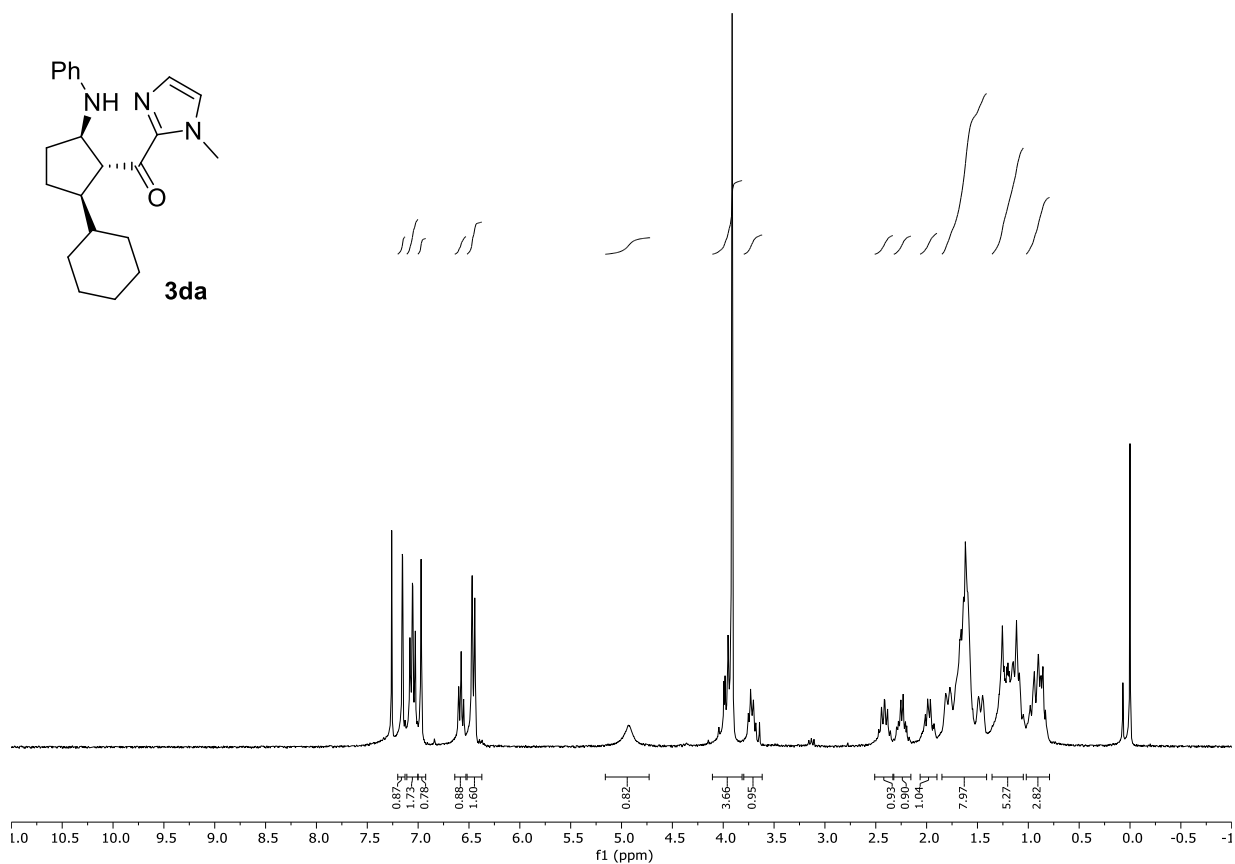

Figure S13. <sup>1</sup>H NMR spectrum (300 MHz, 298K, CDCl<sub>3</sub>) of **3da**.

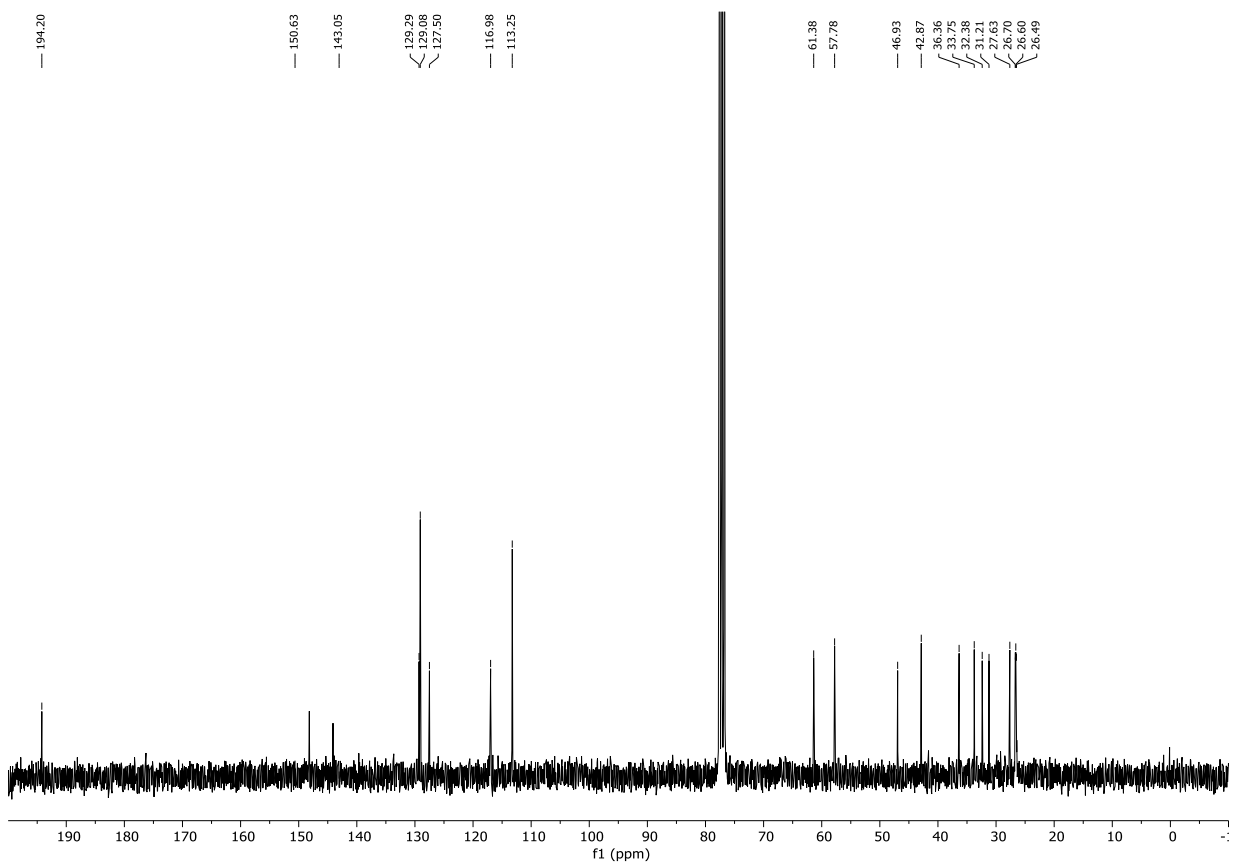

Figure S14. <sup>13</sup>C NMR spectrum (75 MHz, 298K, CDCl<sub>3</sub>) of **3da**.

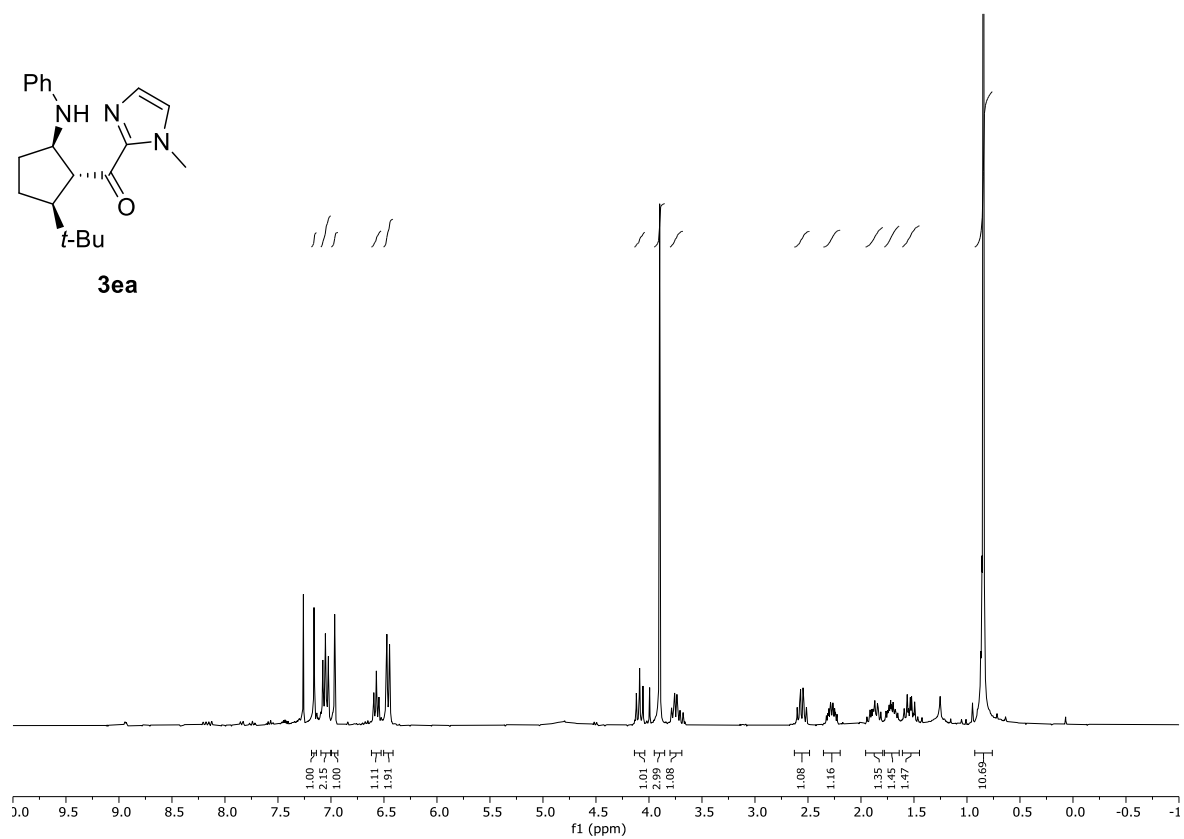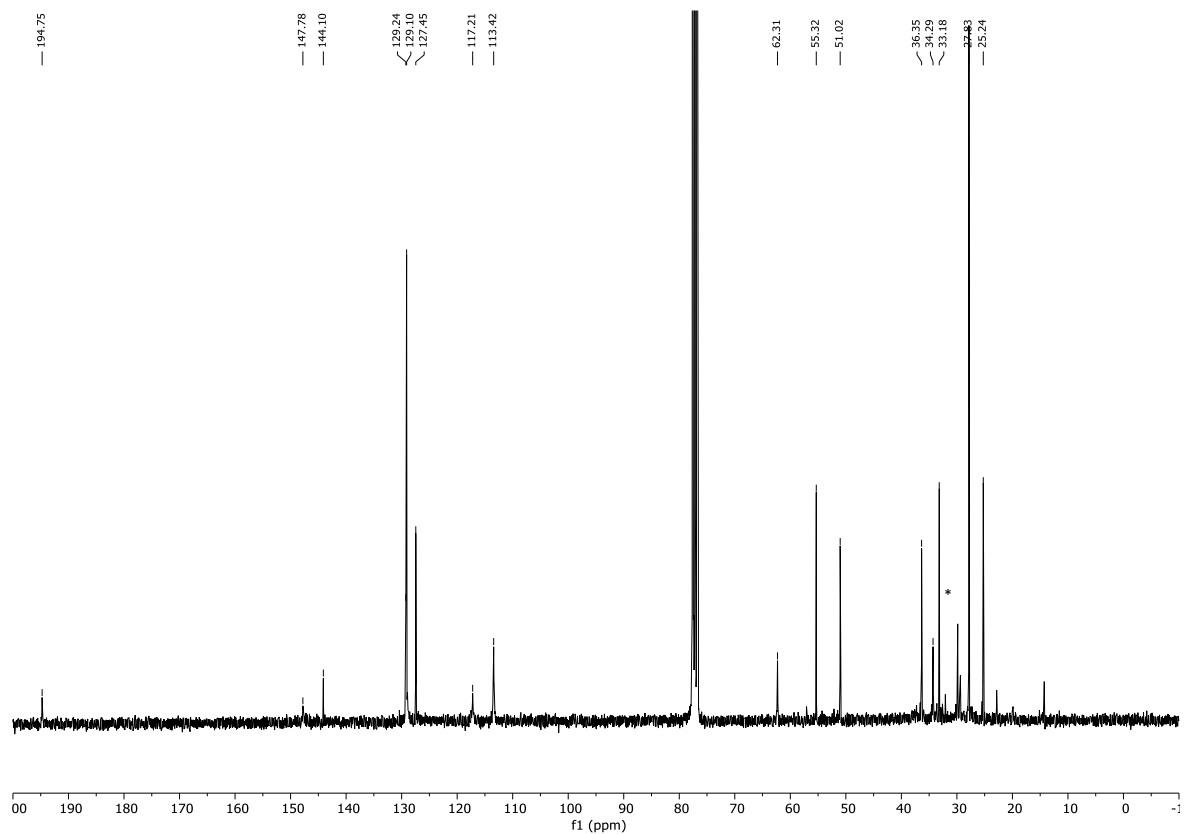

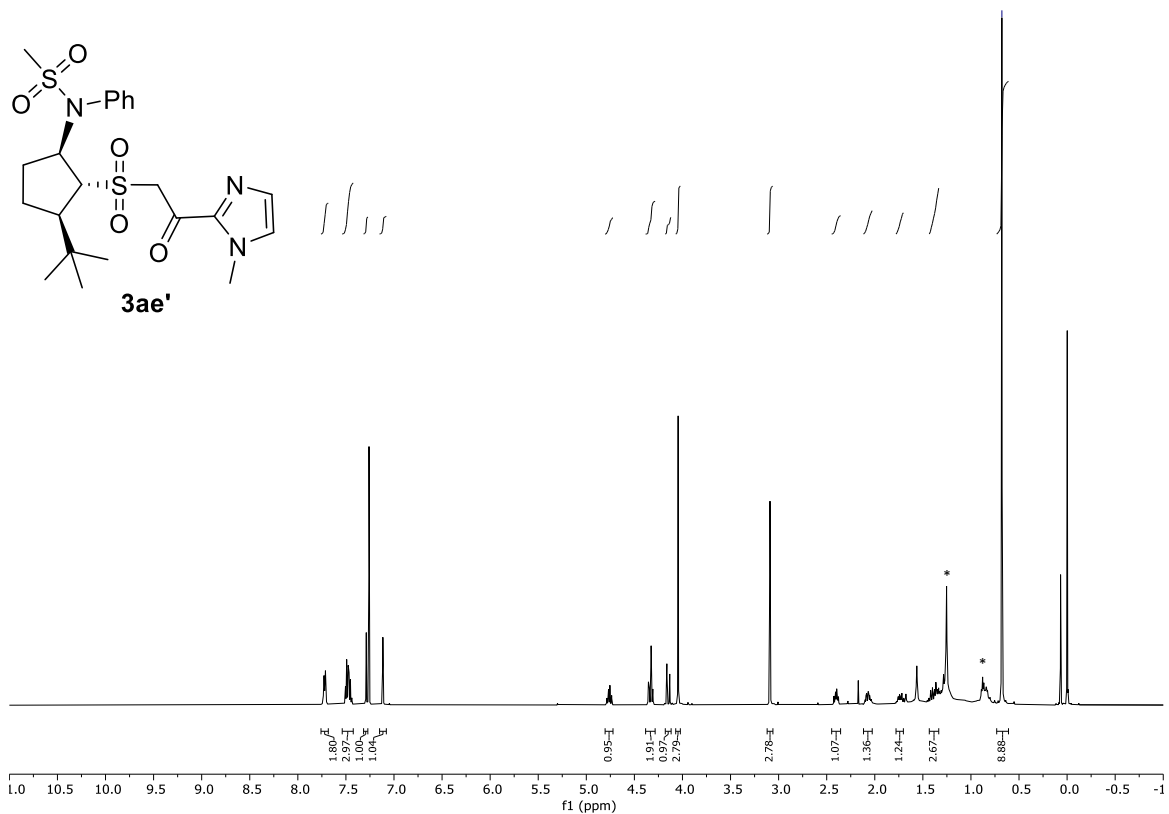

**Figure S17.**  $^1\text{H}$  NMR spectrum (500 MHz, 298K,  $\text{CDCl}_3$ ) of **3ea'** (\*Grease peaks).

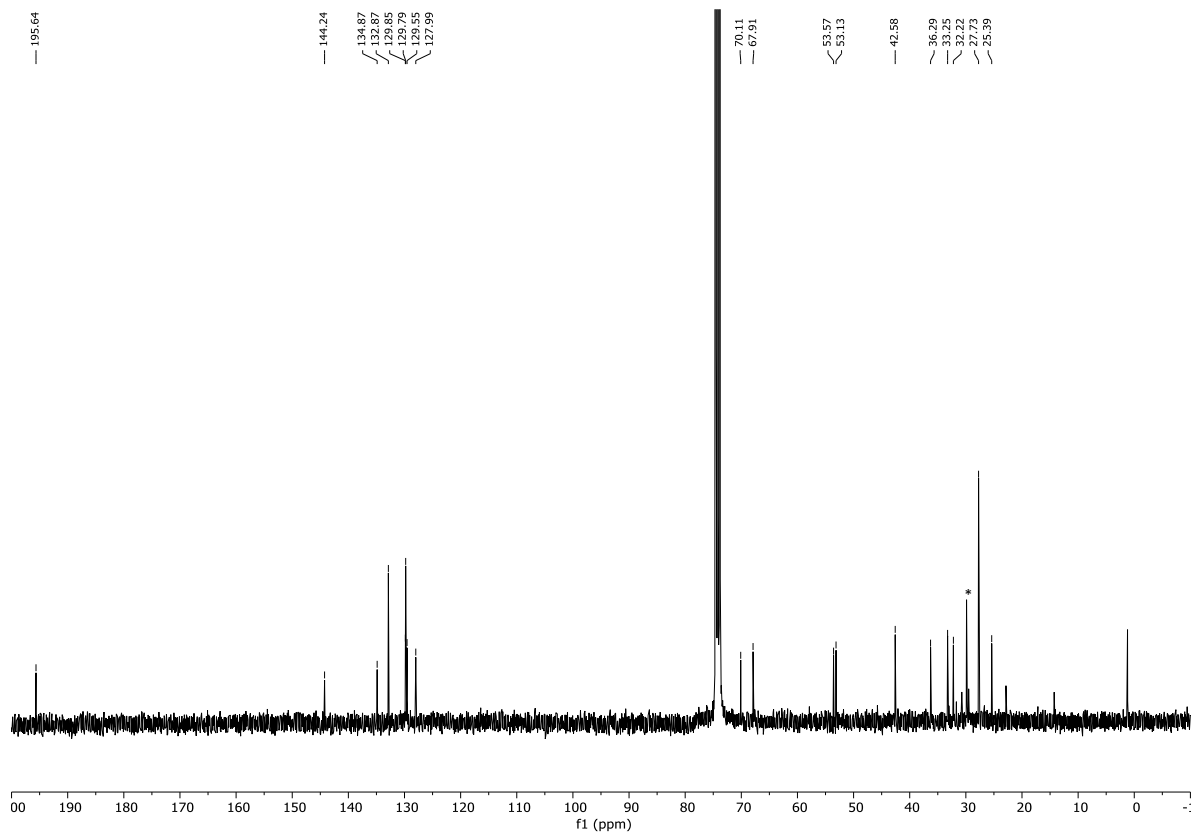

**Figure S18.**  $^{13}\text{C}$  NMR spectrum (75 MHz, 353K,  $\text{C}_2\text{D}_2\text{Cl}_4$ ) of **3ea'** (\*Grease peak).

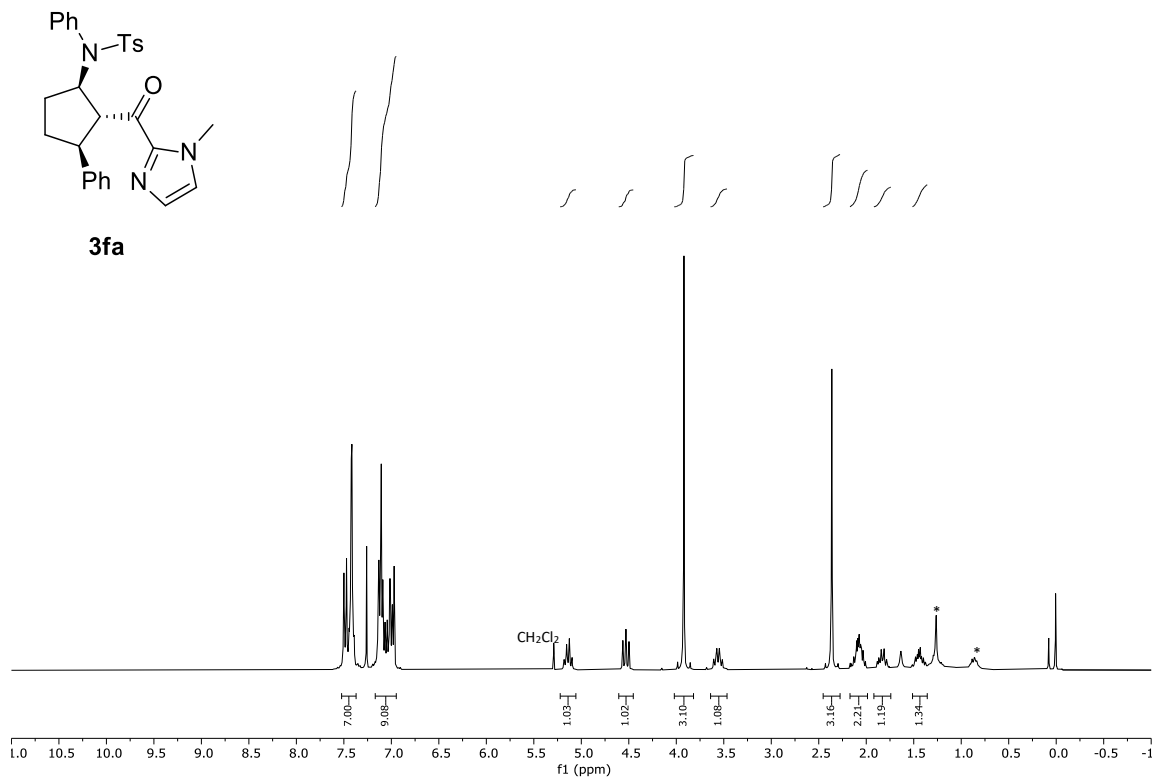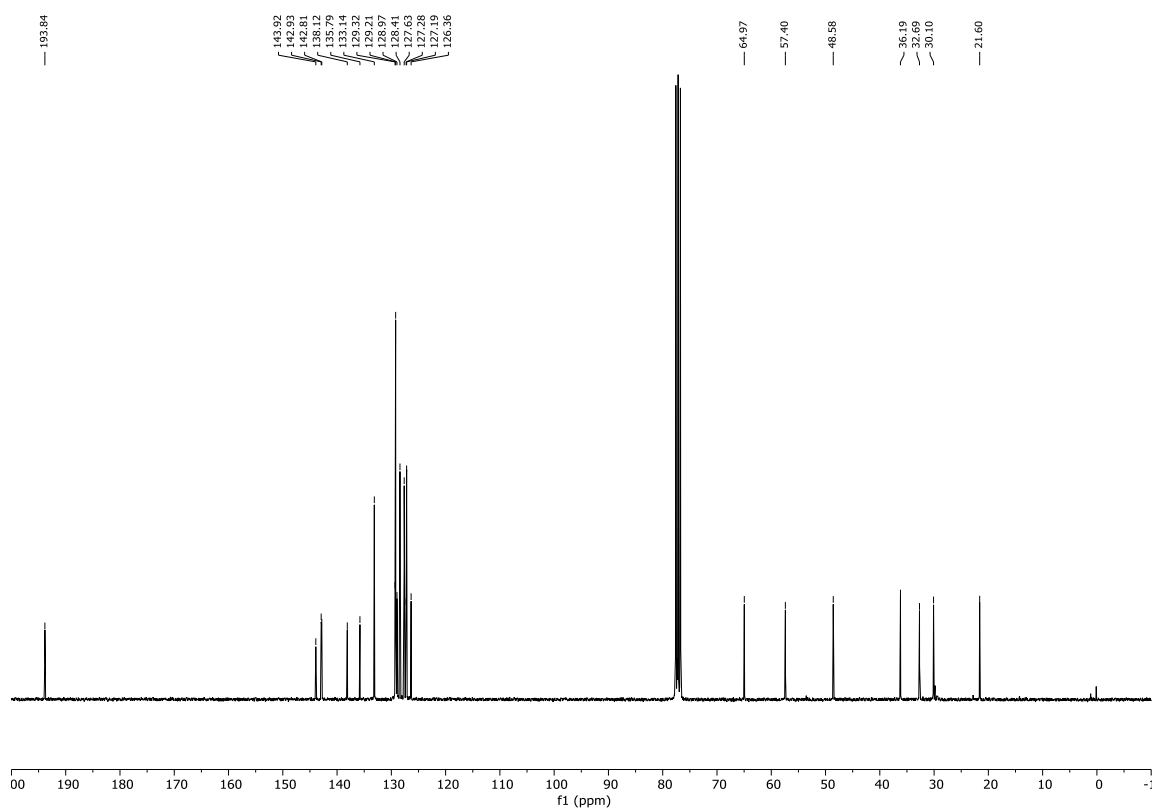

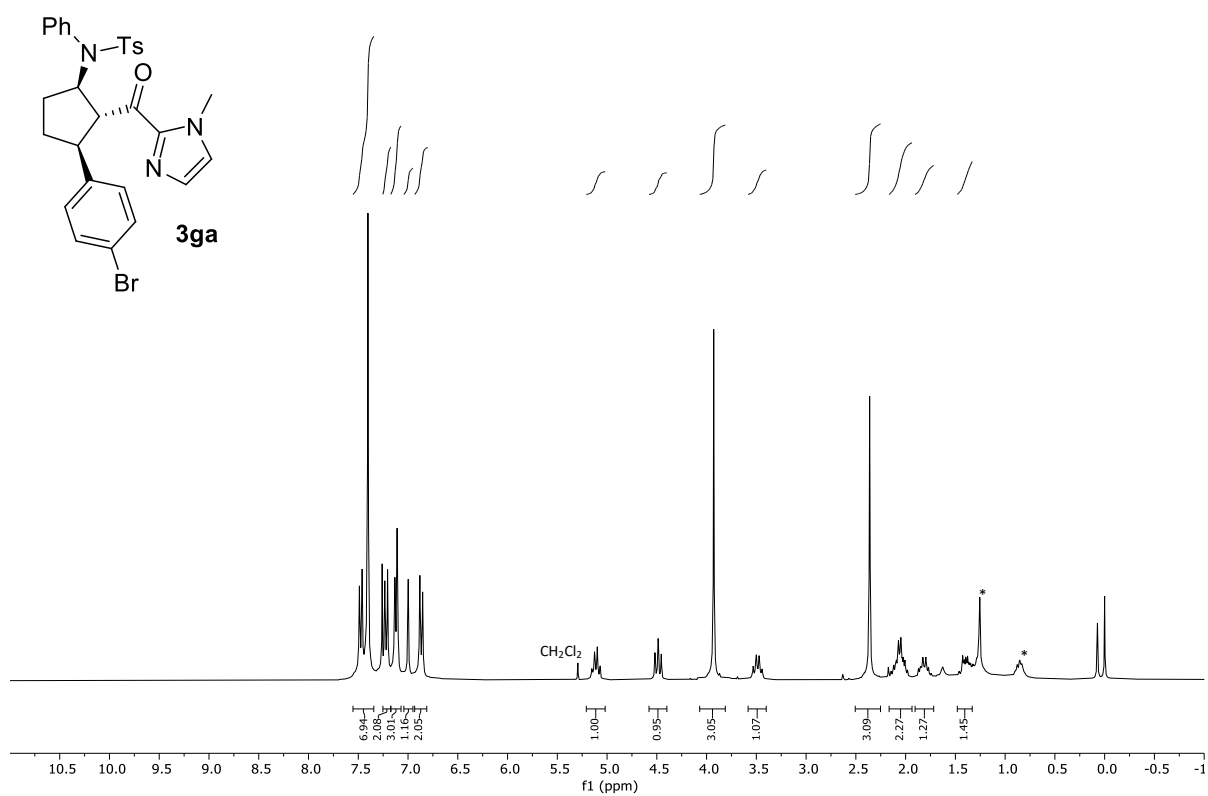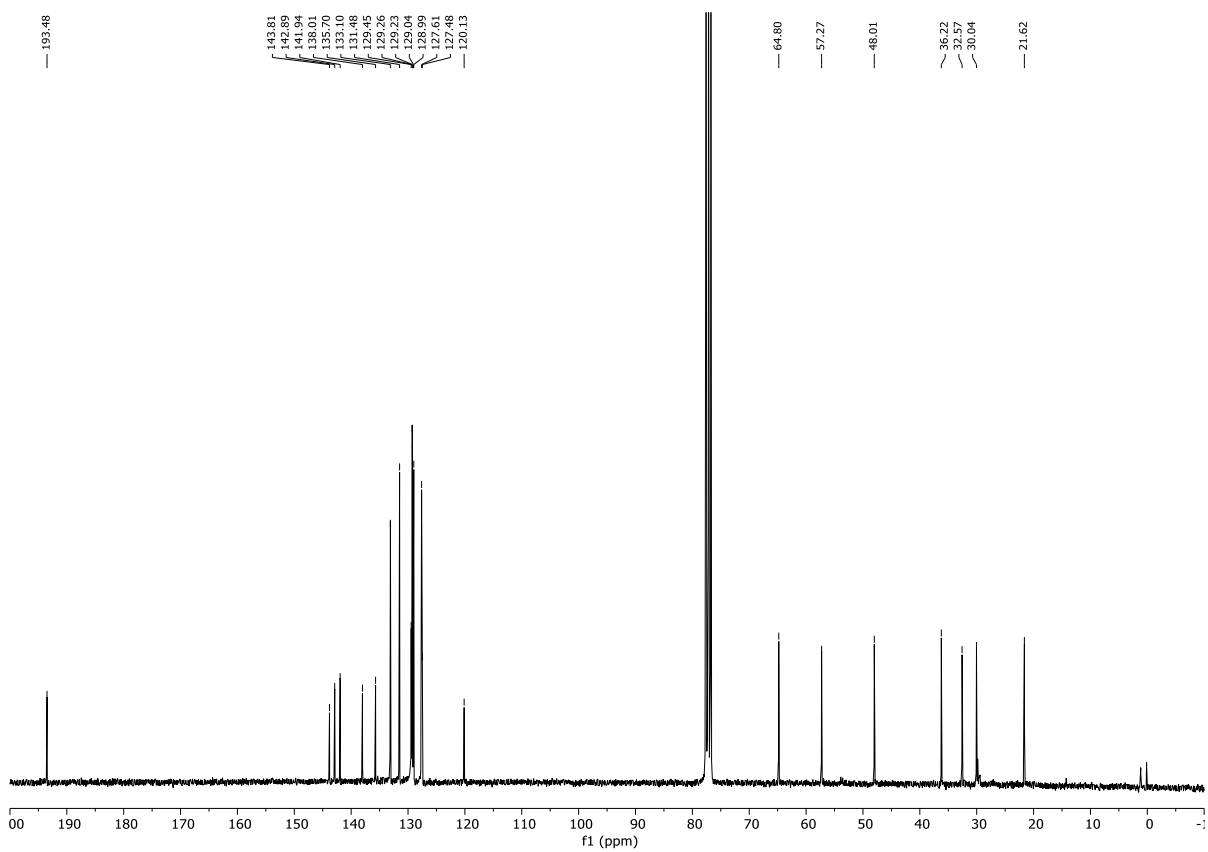

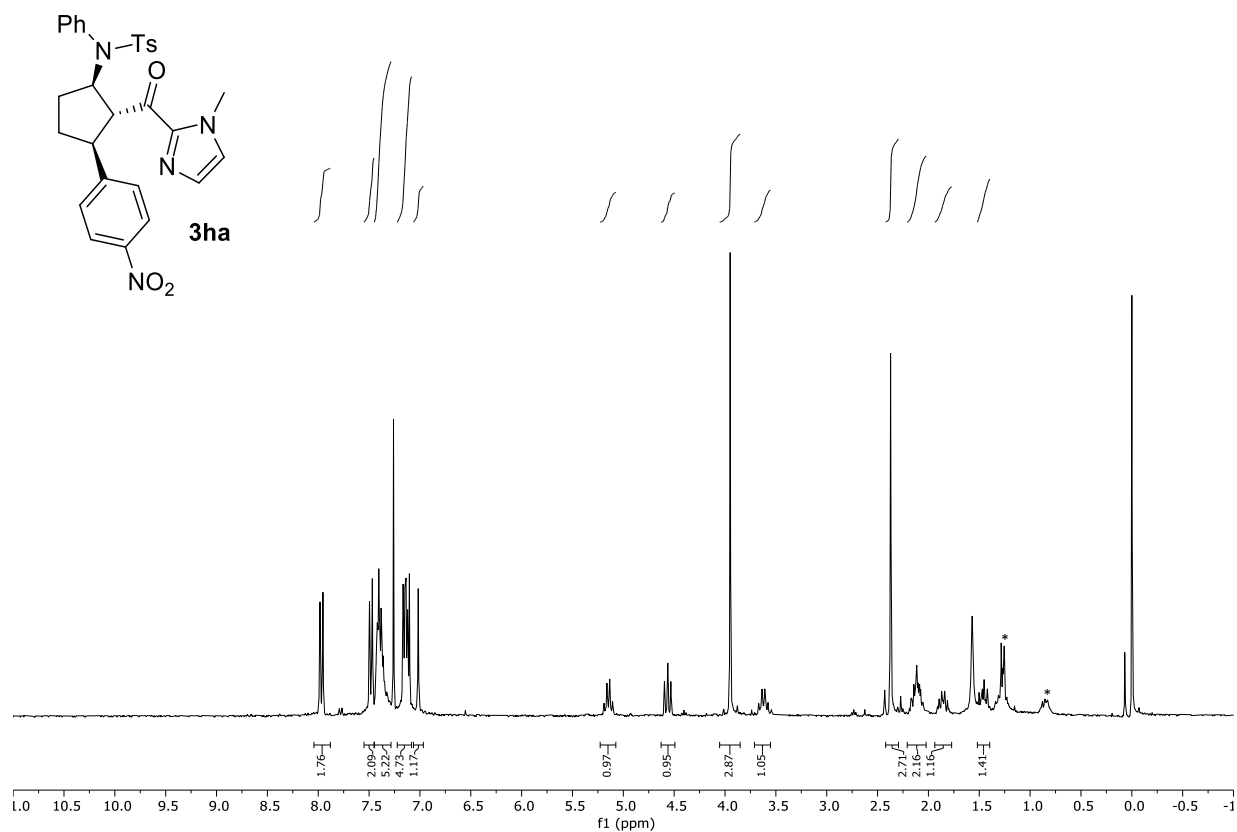

Figure S23. <sup>1</sup>H NMR spectrum (300 MHz, 298K, CDCl<sub>3</sub>) of **3ha** (Grease peaks).

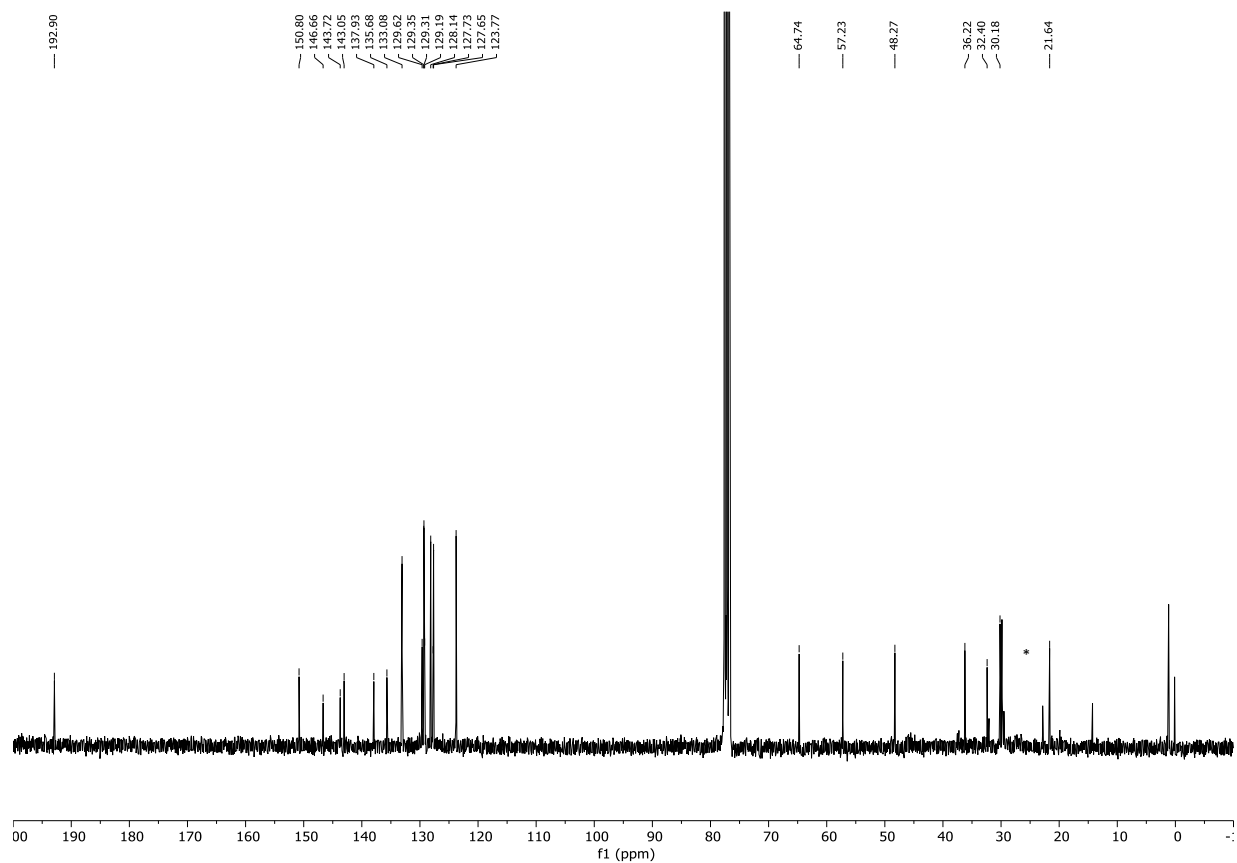

Figure S24. <sup>13</sup>C NMR spectrum (75 MHz, 298K, CDCl<sub>3</sub>) of **3ha** (Grease peak).

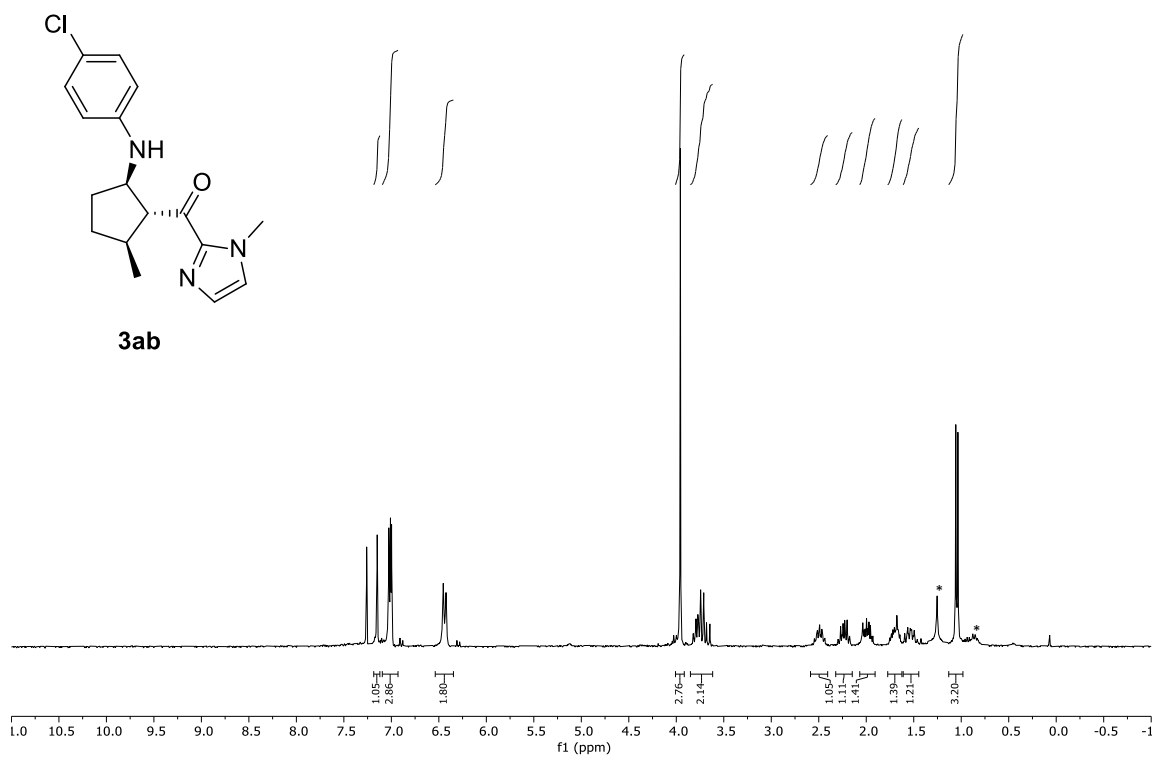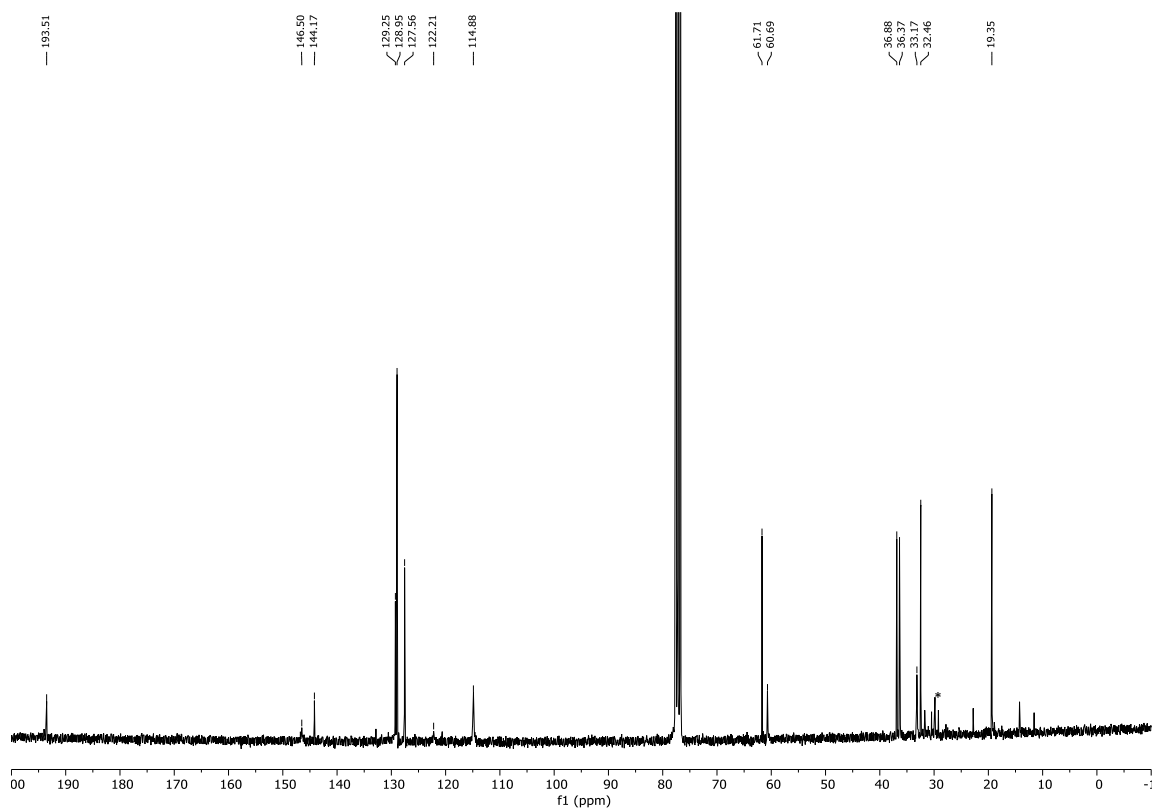



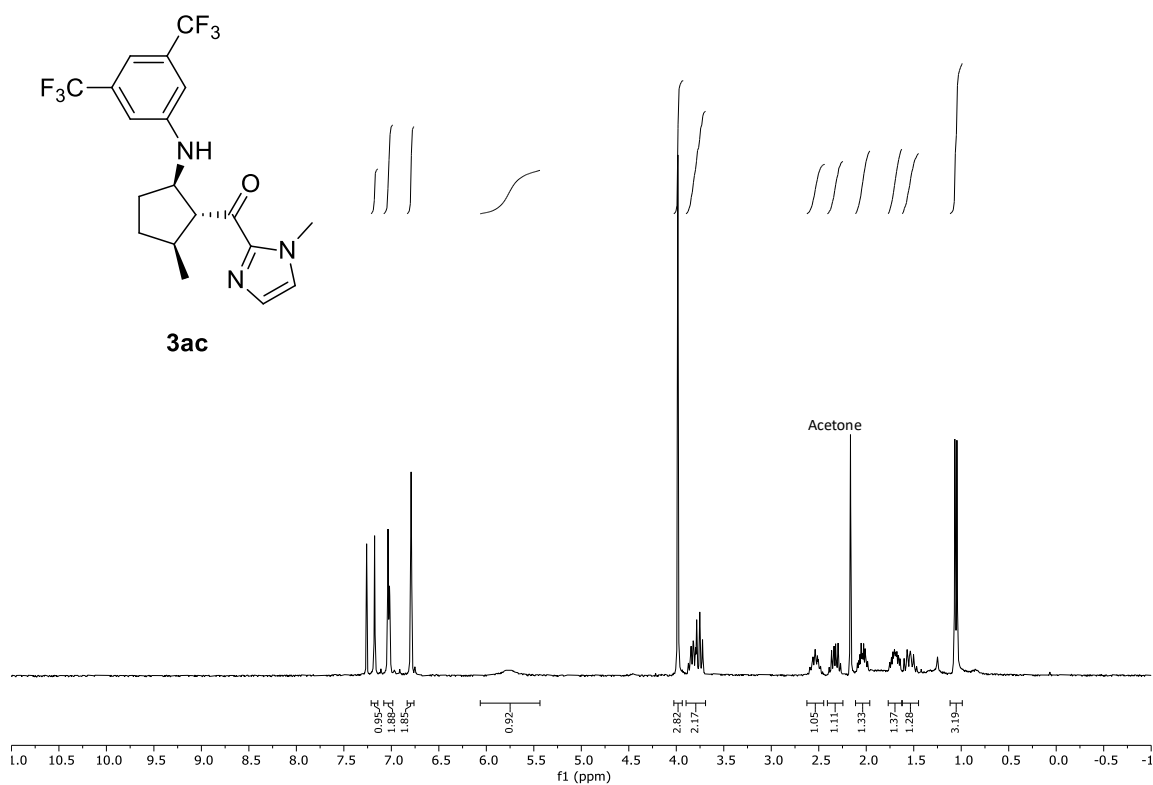

Figure S27.  $^1\text{H}$  NMR spectrum (300 MHz, 298K,  $\text{CDCl}_3$ ) of **3ac**.

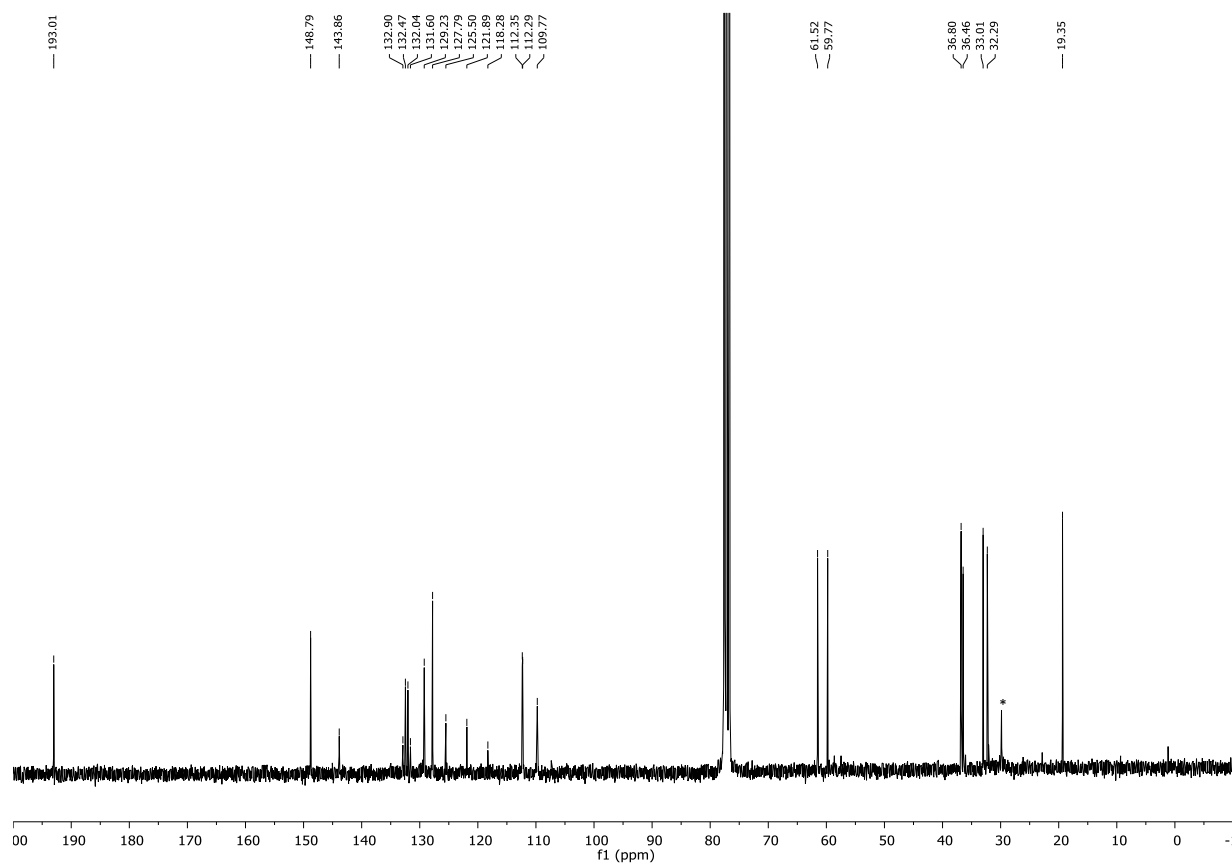

Figure S28.  $^{13}\text{C}$  NMR spectrum (75 MHz, 298K,  $\text{CDCl}_3$ ) of **3ac** (Grease peak).

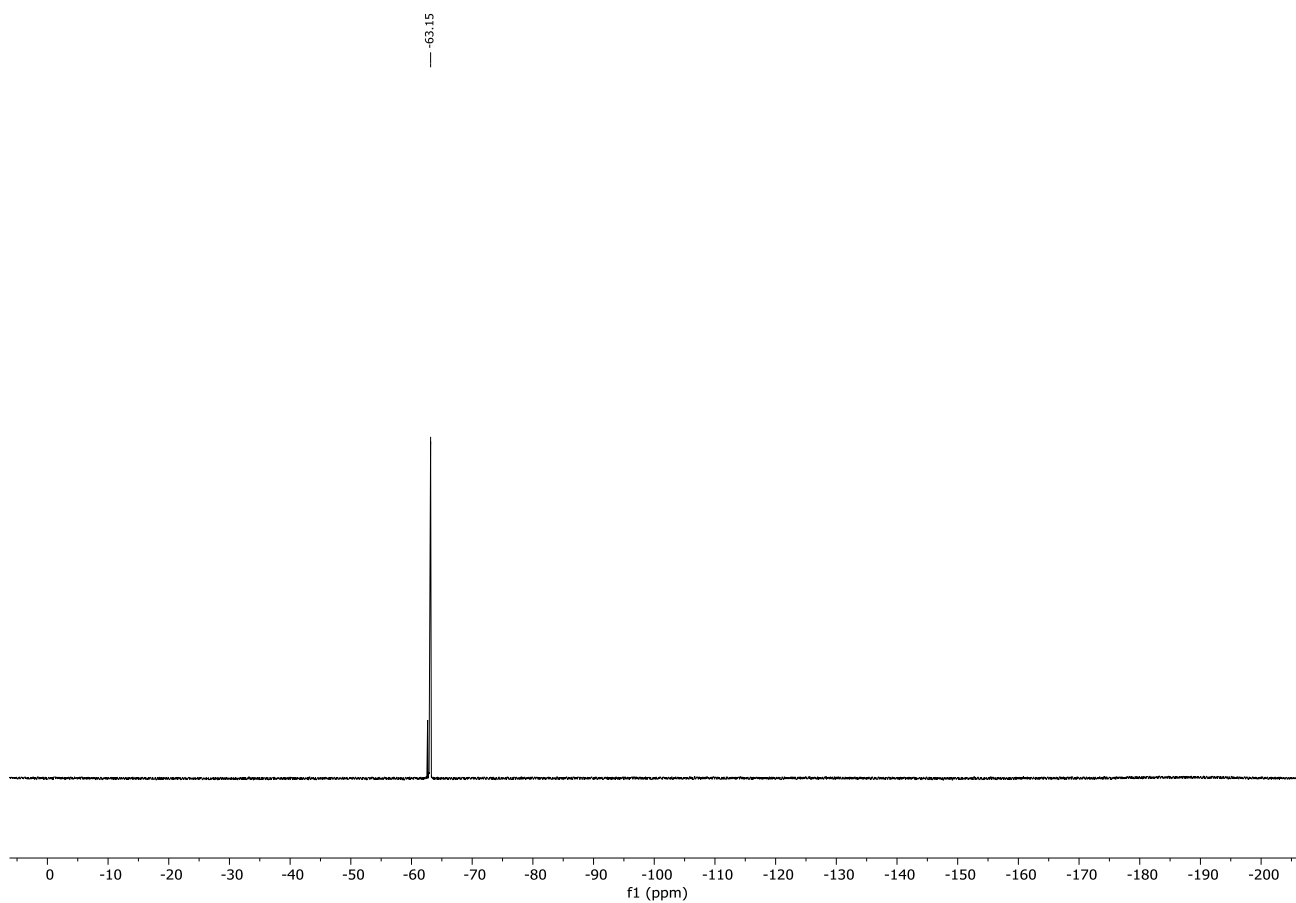

**Figure S29.**  $^{19}\text{F}$  NMR spectrum (471 MHz, 298K,  $\text{CDCl}_3$ ) of **3ac**.

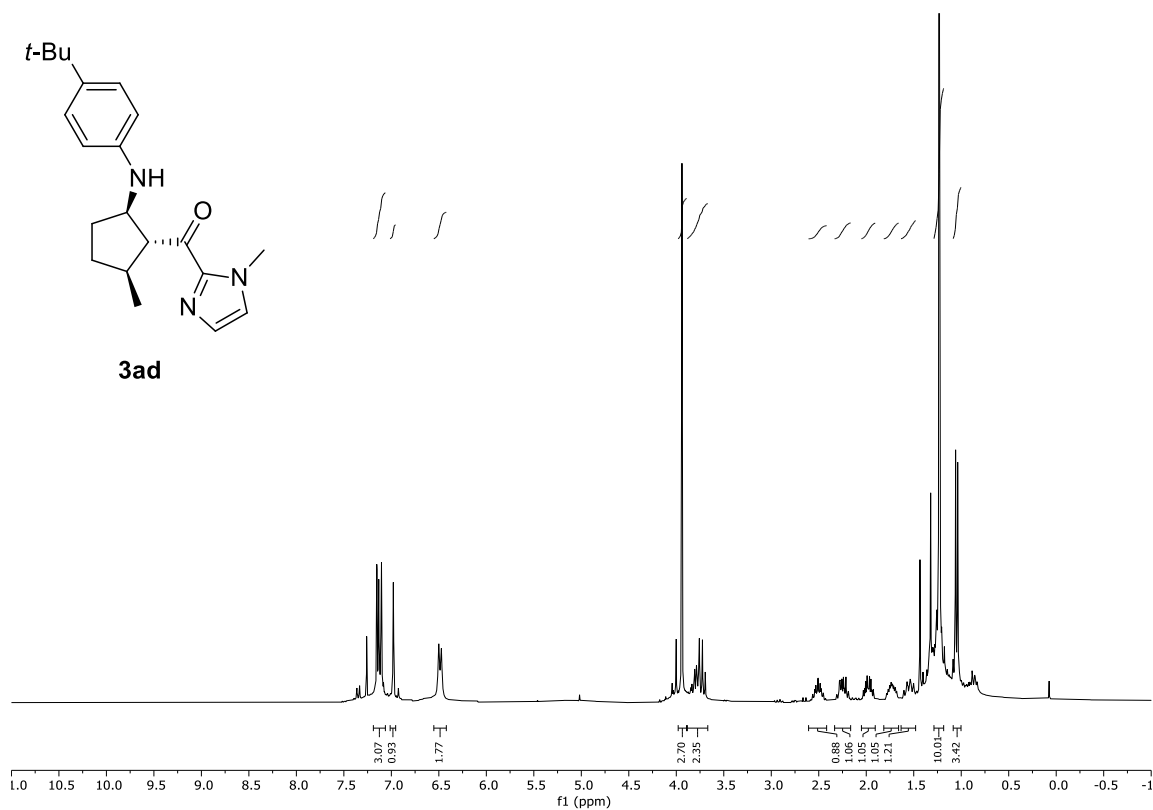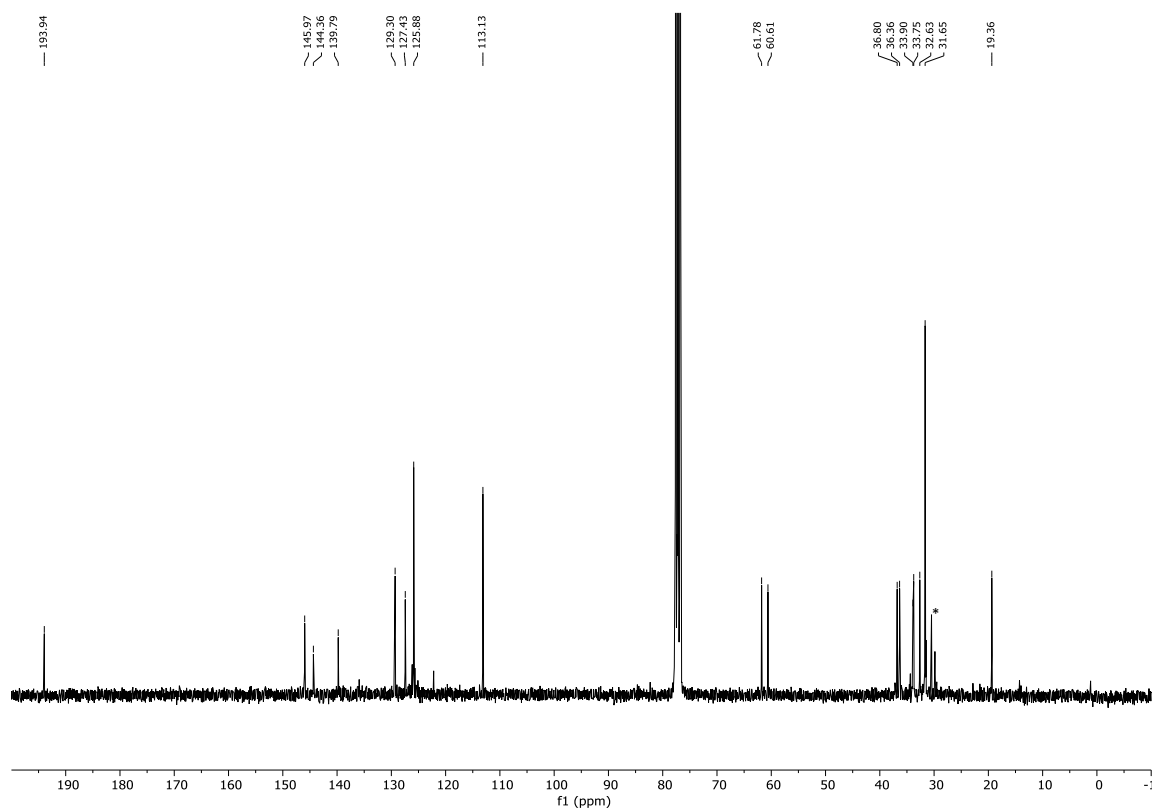

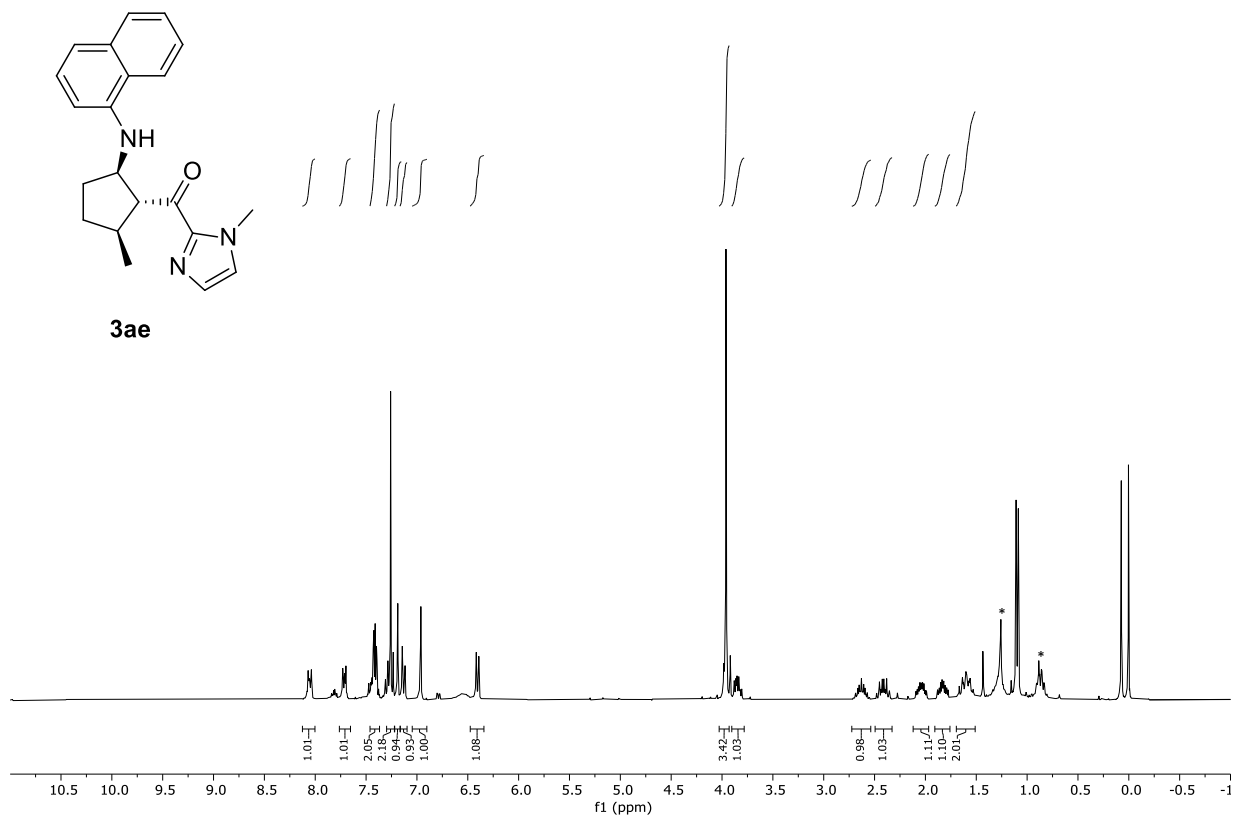

Figure S32.  $^1\text{H}$  NMR spectrum (300 MHz, 298K,  $\text{CDCl}_3$ ) of **3ae** (Grease peaks).

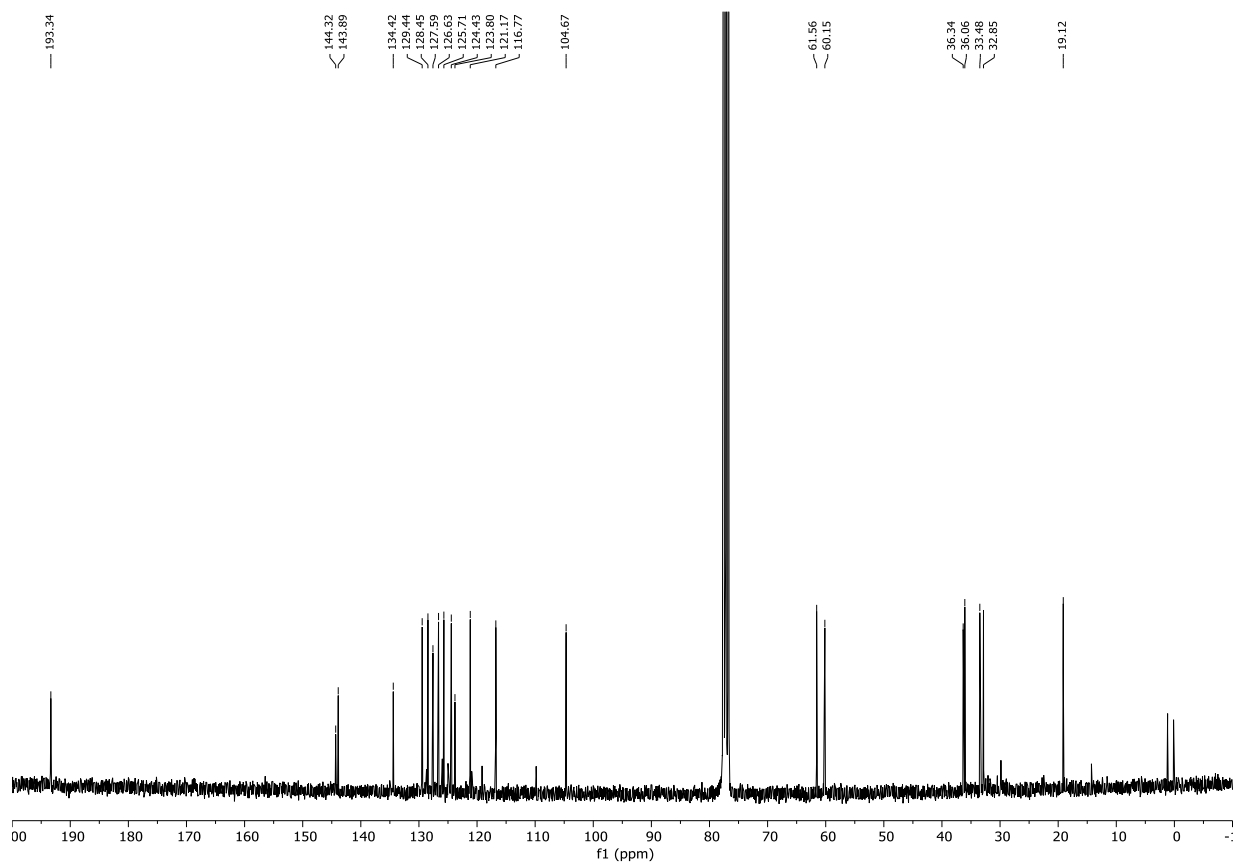

Figure S33.  $^{13}\text{C}$  NMR spectrum (75 MHz, 298K,  $\text{CDCl}_3$ ) of **3ae**.

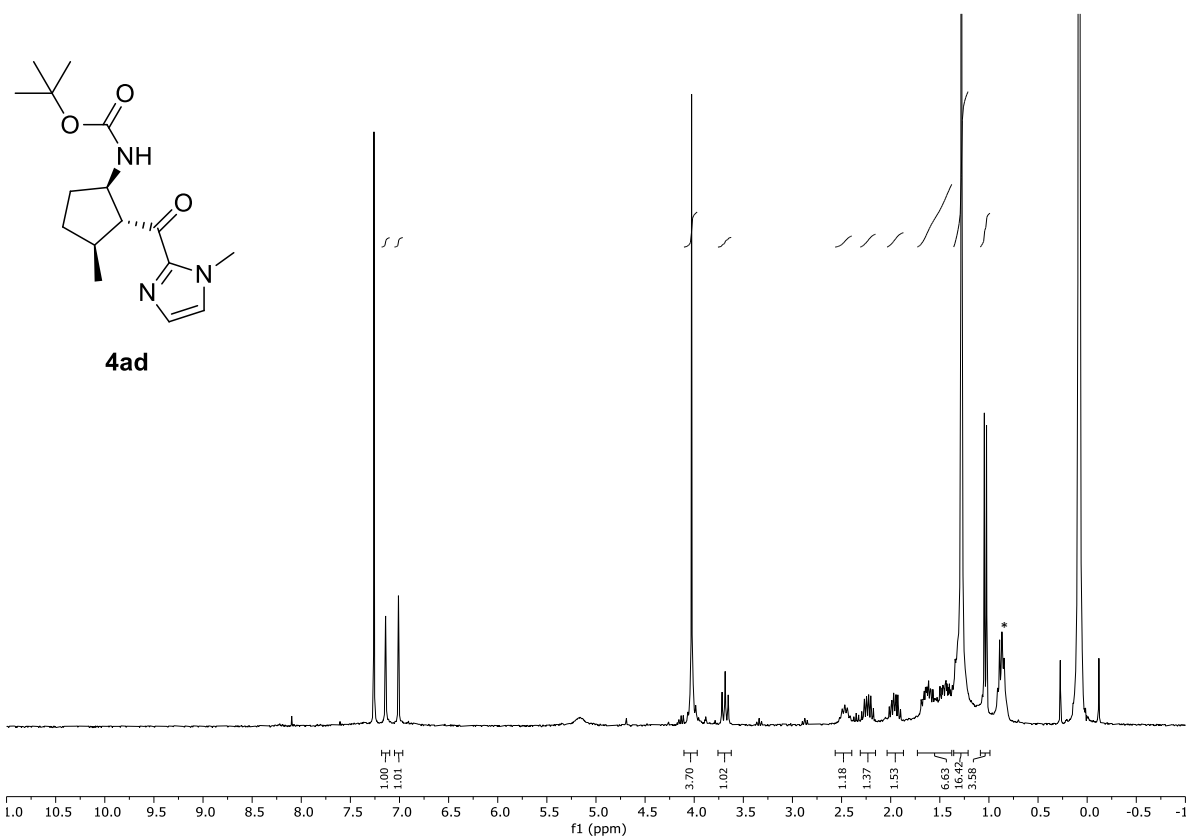

**Figure S34.**  $^1\text{H}$  NMR spectrum (300 MHz, 323K,  $\text{CDCl}_3$ ) of **4ad** (Grease peak).

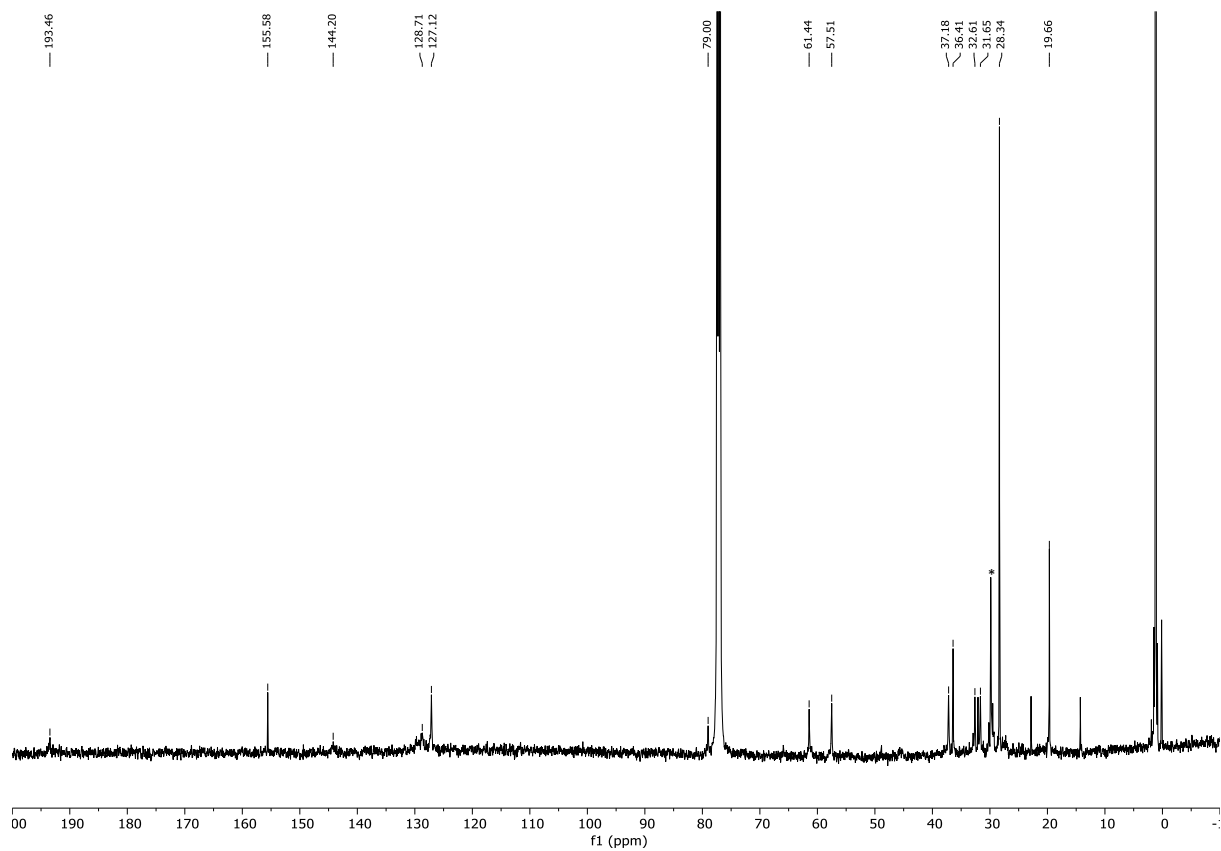

**Figure S35.**  $^{13}\text{C}$  NMR spectrum (126 MHz, 298K,  $\text{CDCl}_3$ ) of **4ad** (Grease peak).

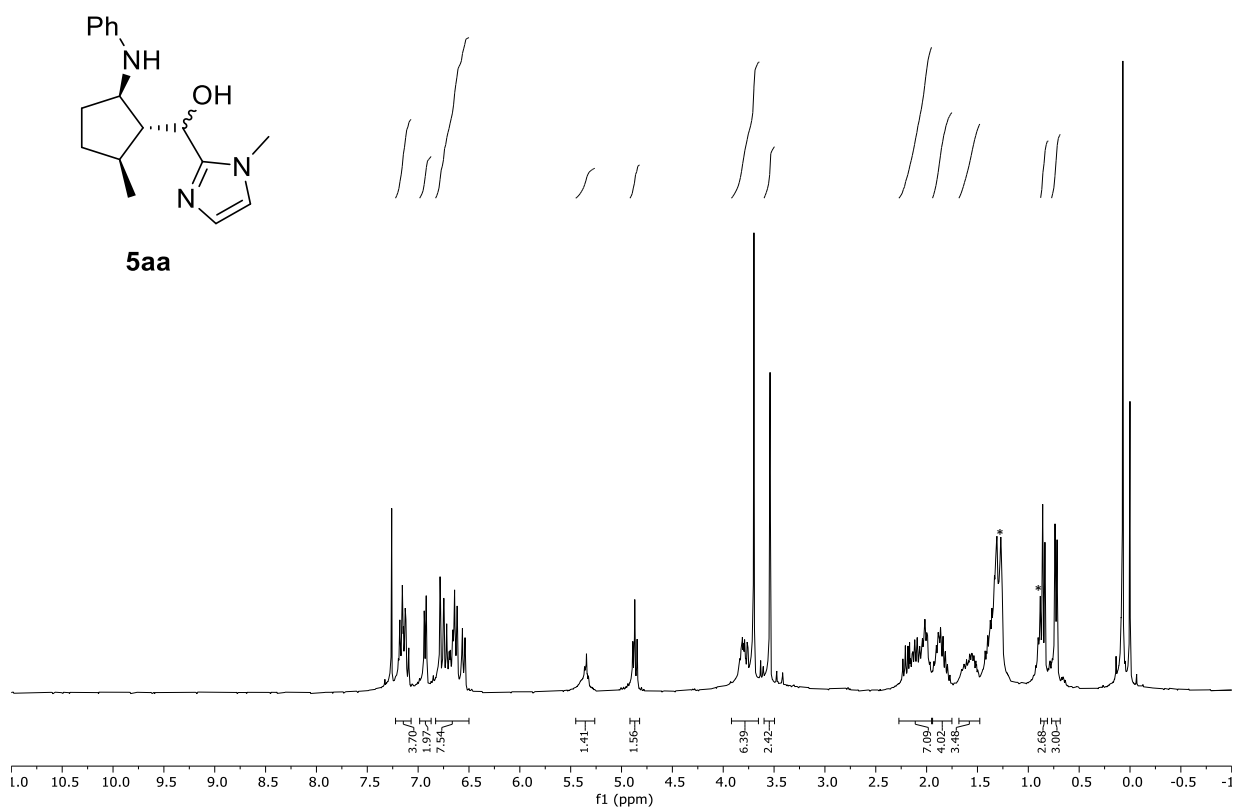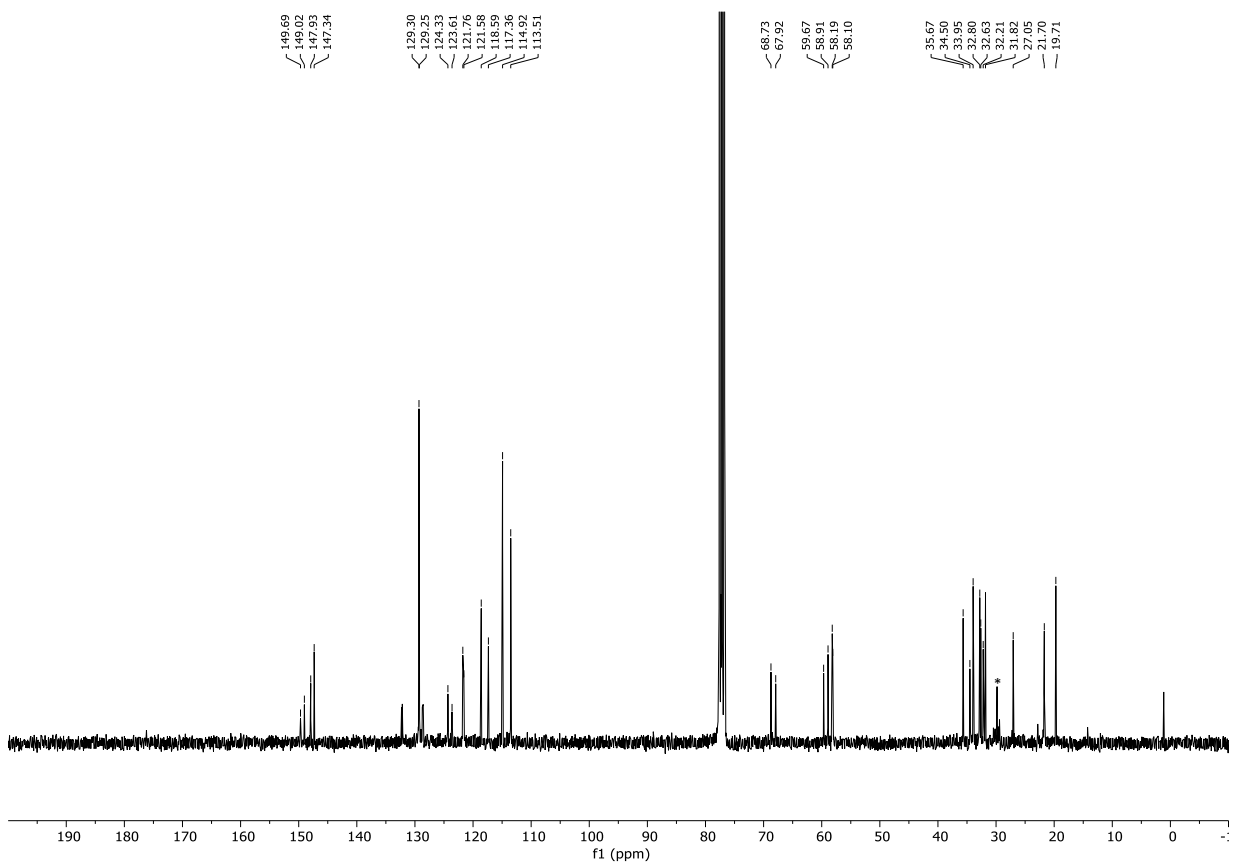

## 10. X-ray information.

### 10.1. Compound 3ab:

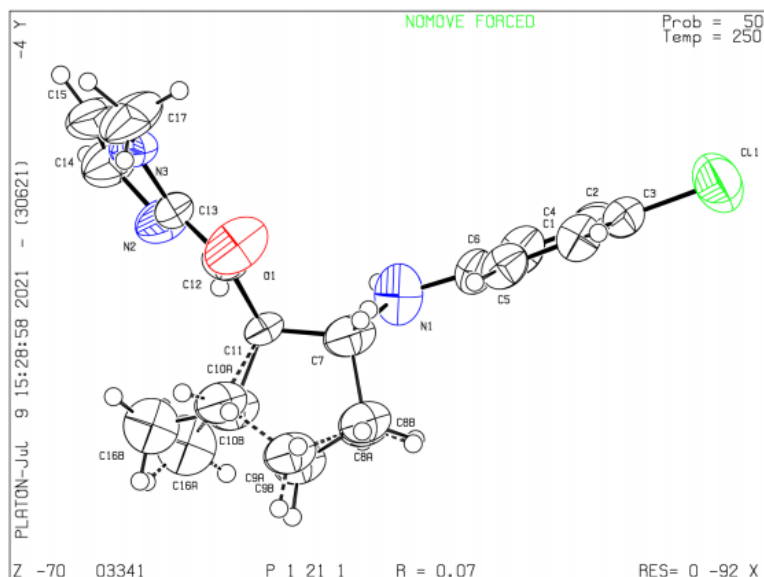

**Figure S38.** X-Ray structure of **3ab**.

Bond precision: C-C = 0.0126 Å      Wavelength=0.71073

Cell:                    a=7.262 (6)      b=10.514 (6)      c=11.343 (8)  
                               alpha=90      beta=97.63 (3)      gamma=90

Temperature:            250 K

|                        | Calculated                       | Reported        |
|------------------------|----------------------------------|-----------------|
| Volume                 | 858.4 (11)                       | 858.4 (11)      |
| Space group            | P 21                             | P 1 21 1        |
| Hall group             | P 2yb                            | P 2yb           |
| Moiety formula         | C17 H19.44 Cl N3 O,<br>0.557 (H) | ?               |
| Sum formula            | C17 H20 Cl N3 O                  | C17 H20 Cl N3 O |
| Mr                     | 317.81                           | 317.81          |
| Dx, g cm <sup>-3</sup> | 1.230                            | 1.230           |
| Z                      | 2                                | 2               |
| Mu (mm <sup>-1</sup> ) | 0.228                            | 0.228           |
| F000                   | 336.0                            | 336.0           |
| F000'                  | 336.41                           |                 |
| h, k, lmax             | 8, 12, 13                        | 8, 12, 13       |
| Nref                   | 3152 [ 1669]                     | 2999            |
| Tmin, Tmax             | 0.962, 0.979                     | 0.780, 0.980    |
| Tmin'                  | 0.948                            |                 |

Correction method= # Reported T Limits: Tmin=0.780 Tmax=0.980  
 AbsCorr = MULTI-SCAN

Data completeness= 1.80/0.95      Theta(max)= 25.310

R(reflections)= 0.0700 ( 1433)      wR2(reflections)= 0.1939 ( 2999)

S = 1.009                                  Npar= 199





## 11. SFC chromatograms for quiral compounds.

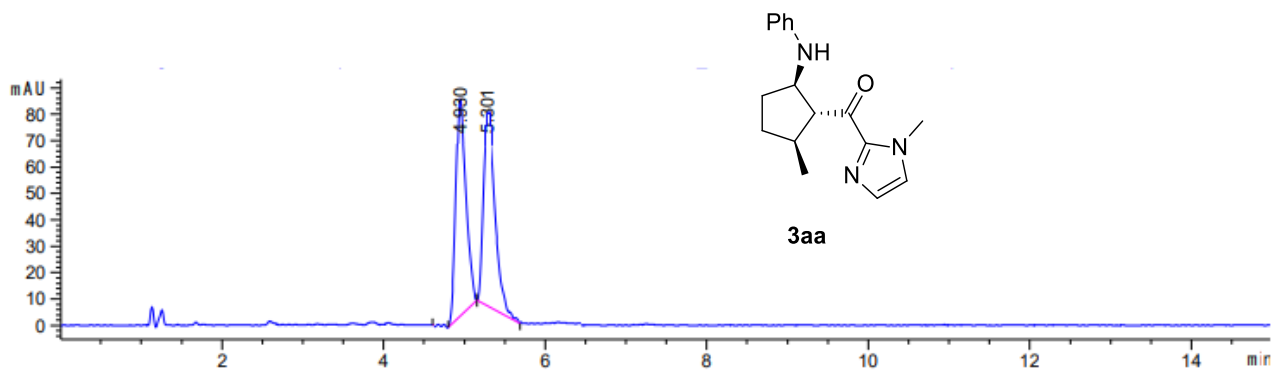

| Peak # | RetTime [min] | Type | Width [min] | Area [mAU*s] | Height [mAU] | Area %  |
|--------|---------------|------|-------------|--------------|--------------|---------|
| 1      | 4.930         | BB   | 0.1171      | 835.37225    | 95.96170     | 50.2540 |
| 2      | 5.301         | BB   | 0.1111      | 826.92657    | 88.23700     | 49.7460 |

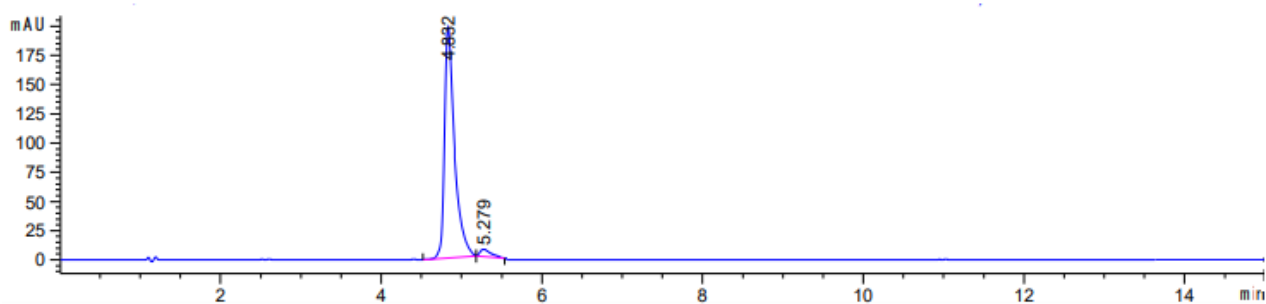

| Peak # | RetTime [min] | Type | Width [min] | Area [mAU*s] | Height [mAU] | Area %  |
|--------|---------------|------|-------------|--------------|--------------|---------|
| 1      | 4.832         | BB   | 0.1267      | 1702.33911   | 197.21123    | 96.8261 |
| 2      | 5.279         | BB   | 0.1367      | 55.80078     | 6.09888      | 3.1739  |

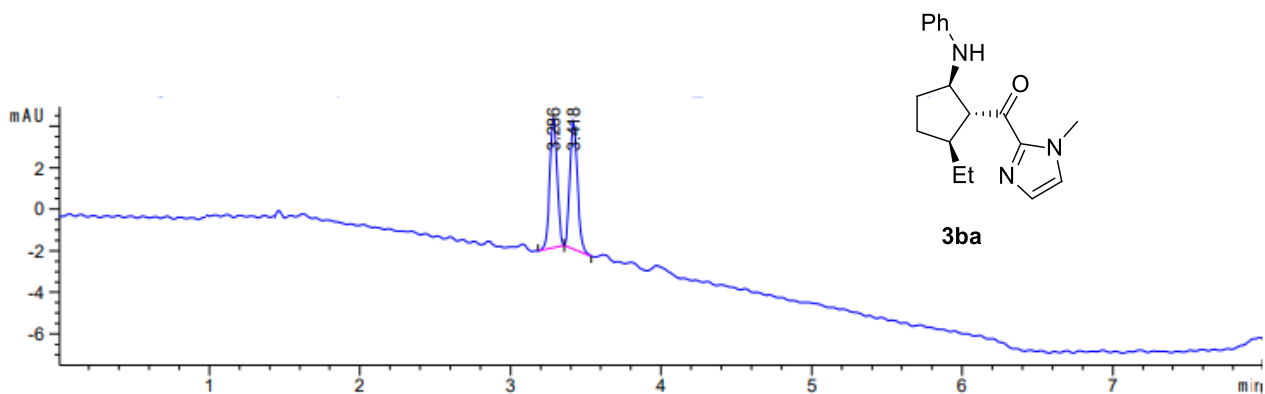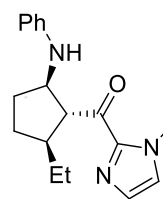

**3ba**

| Peak # | RetTime [min] | Type | Width [min] | Area [mAU*s] | Height [mAU] | Area %  |
|--------|---------------|------|-------------|--------------|--------------|---------|
| 1      | 3.286         | BB   | 0.0538      | 21.31854     | 6.24705      | 49.7119 |
| 2      | 3.418         | BB   | 0.0551      | 21.56563     | 6.12449      | 50.2881 |

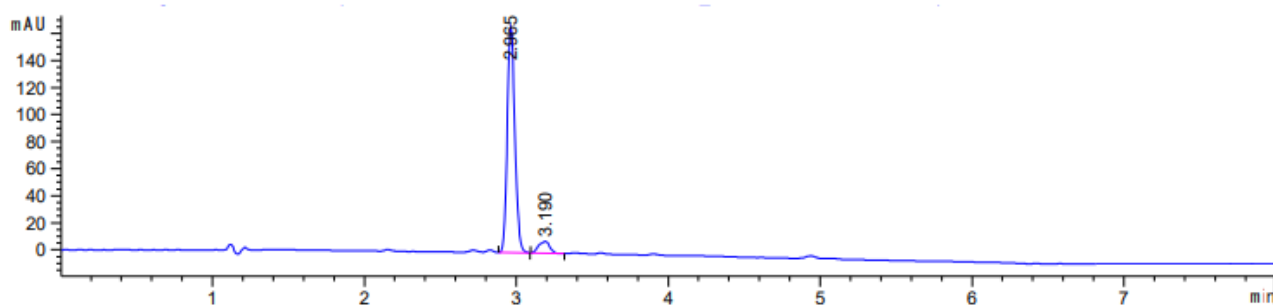

| Peak # | RetTime [min] | Type | Width [min] | Area [mAU*s] | Height [mAU] | Area %  |
|--------|---------------|------|-------------|--------------|--------------|---------|
| 1      | 2.965         | BB   | 0.0544      | 578.78571    | 167.03435    | 93.0155 |
| 2      | 3.190         | BB   | 0.0852      | 43.46056     | 8.55874      | 6.9845  |

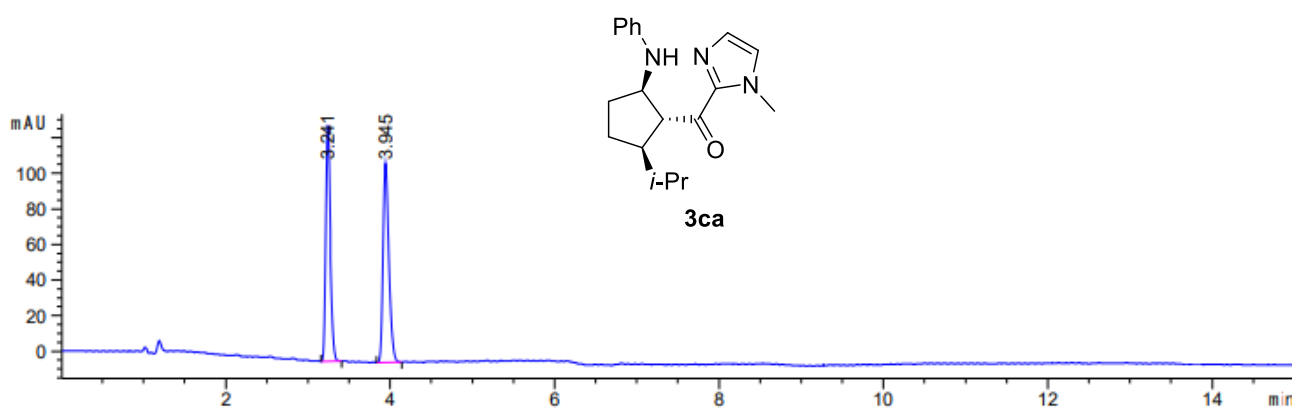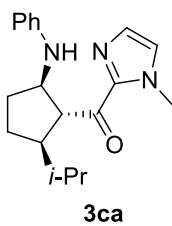

| Peak # | RetTime [min] | Type | Width [min] | Area [mAU*s] | Height [mAU] | Area %  |
|--------|---------------|------|-------------|--------------|--------------|---------|
| 1      | 3.241         | BB   | 0.0602      | 527.76666    | 133.34747    | 49.5550 |
| 2      | 3.945         | BB   | 0.0741      | 537.24548    | 111.69067    | 50.4450 |

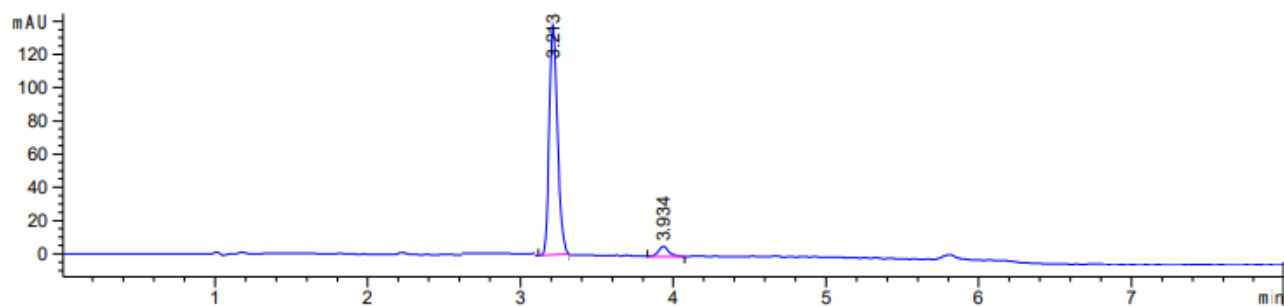

| Peak # | RetTime [min] | Type | Width [min] | Area [mAU*s] | Height [mAU] | Area %  |
|--------|---------------|------|-------------|--------------|--------------|---------|
| 1      | 3.213         | BB   | 0.0577      | 520.73596    | 139.08580    | 94.6337 |
| 2      | 3.934         | BB   | 0.0717      | 29.52910     | 6.18665      | 5.3663  |

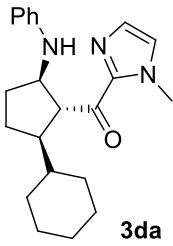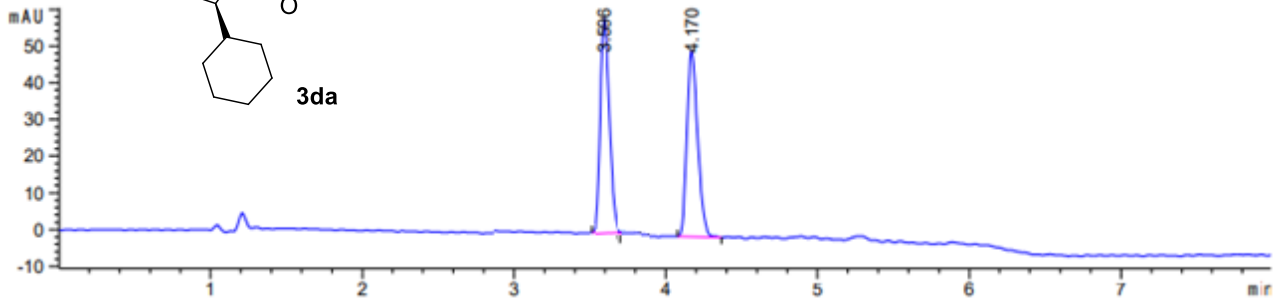

| Peak # | RetTime [min] | Type | Width [min] | Area [mAU*s] | Height [mAU] | Area %  |
|--------|---------------|------|-------------|--------------|--------------|---------|
| 1      | 3.596         | BB   | 0.0673      | 246.80251    | 58.36287     | 49.6173 |
| 2      | 4.170         | BB   | 0.0759      | 250.60988    | 50.50155     | 50.3827 |

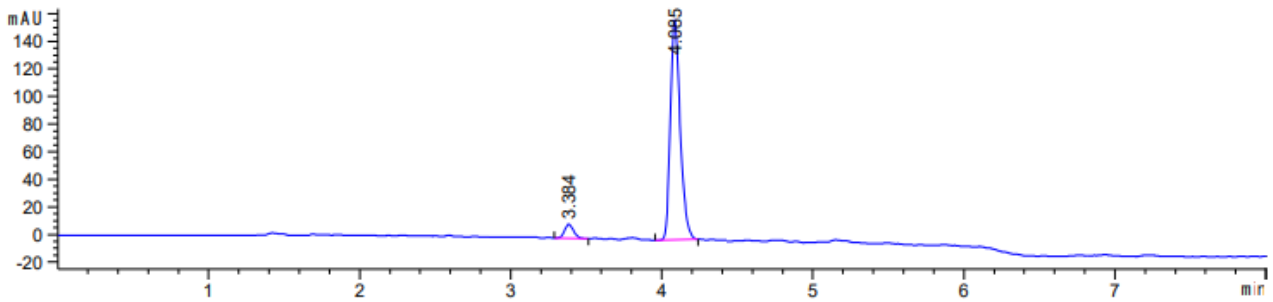

| Peak # | RetTime [min] | Type | Width [min] | Area [mAU*s] | Height [mAU] | Area %  |
|--------|---------------|------|-------------|--------------|--------------|---------|
| 1      | 3.384         | BB   | 0.0638      | 41.96161     | 10.24793     | 5.5163  |
| 2      | 4.085         | BB   | 0.0685      | 718.72052    | 159.65935    | 94.4837 |

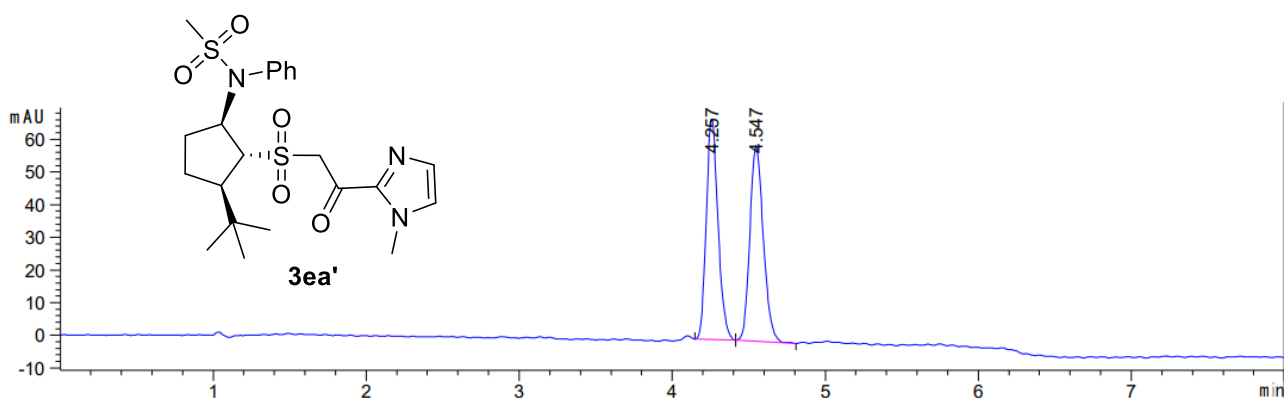

| Peak # | RetTime [min] | Type | Width [min] | Area [mAU*s] | Height [mAU] | Area %  |
|--------|---------------|------|-------------|--------------|--------------|---------|
| 1      | 4.257         | BB   | 0.0820      | 360.07736    | 67.76046     | 49.4671 |
| 2      | 4.547         | BB   | 0.0937      | 367.83615    | 59.81936     | 50.5329 |

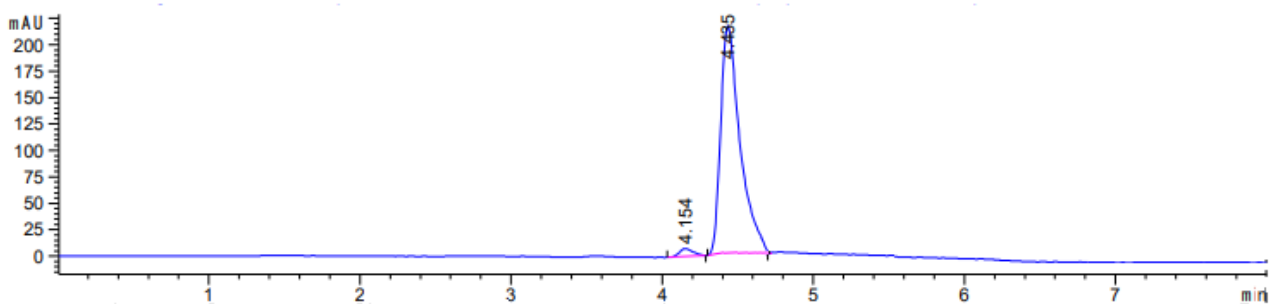

| Peak # | RetTime [min] | Type | Width [min] | Area [mAU*s] | Height [mAU] | Area %  |
|--------|---------------|------|-------------|--------------|--------------|---------|
| 1      | 4.154         | BB   | 0.0954      | 47.42971     | 7.53824      | 2.5072  |
| 2      | 4.435         | BB   | 0.1266      | 1844.32458   | 213.86523    | 97.4928 |

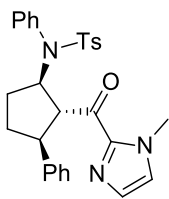

**3fa**

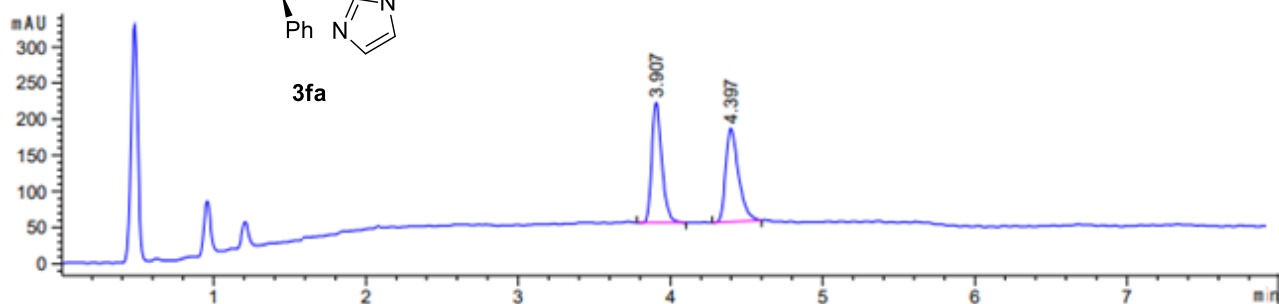

| Peak # | RetTime [min] | Type | Width [min] | Area [mAU*s] | Height [mAU] | Area %  |
|--------|---------------|------|-------------|--------------|--------------|---------|
| 1      | 3.907         | BB   | 0.0692      | 761.30396    | 166.82169    | 50.2383 |
| 2      | 4.397         | BB   | 0.0901      | 754.08105    | 129.10774    | 49.7617 |

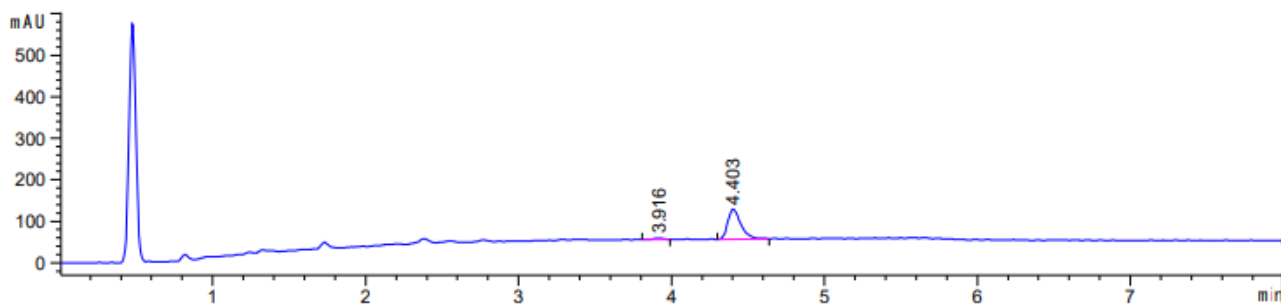

| Peak # | RetTime [min] | Type | Width [min] | Area [mAU*s] | Height [mAU] | Area %  |
|--------|---------------|------|-------------|--------------|--------------|---------|
| 1      | 3.916         | BB   | 0.0691      | 13.75164     | 3.13907      | 3.1394  |
| 2      | 4.403         | BB   | 0.0887      | 424.27618    | 72.01147     | 96.8606 |

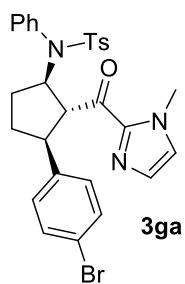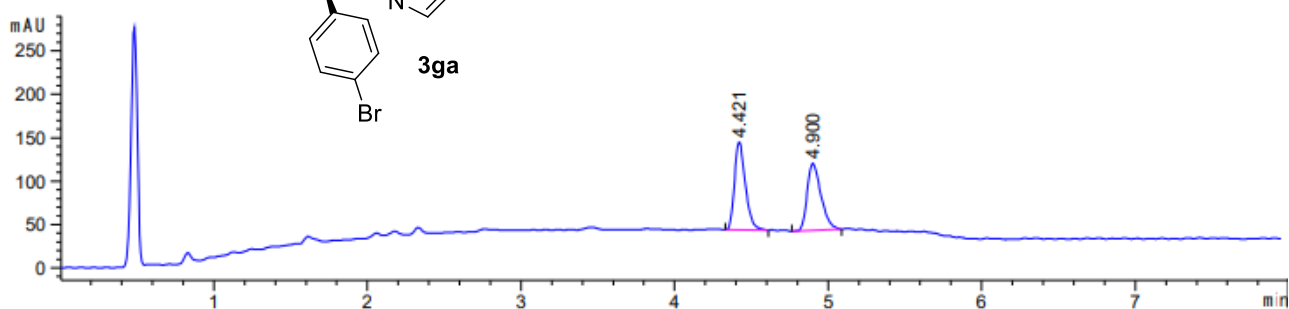

| Peak # | RetTime [min] | Type | Width [min] | Area [mAU*s] | Height [mAU] | Area %  |
|--------|---------------|------|-------------|--------------|--------------|---------|
| 1      | 4.421         | BB   | 0.0735      | 500.13043    | 101.55972    | 50.9747 |
| 2      | 4.900         | BB   | 0.0942      | 481.00406    | 77.67348     | 49.0253 |

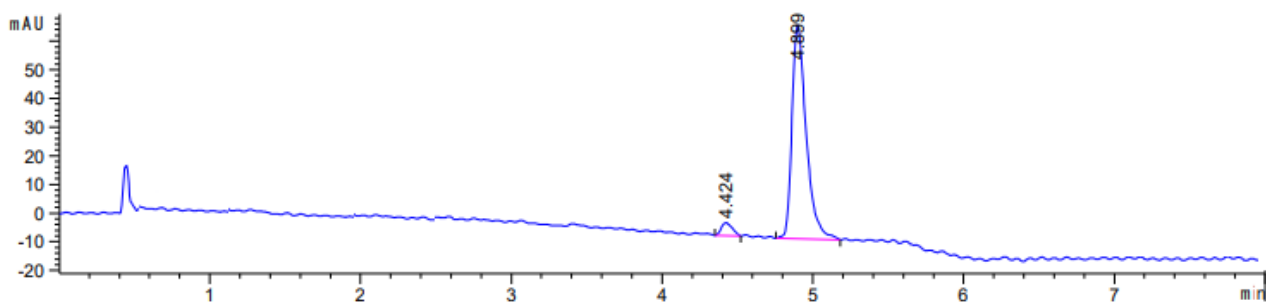

| Peak # | RetTime [min] | Type | Width [min] | Area [mAU*s] | Height [mAU] | Area %  |
|--------|---------------|------|-------------|--------------|--------------|---------|
| 1      | 4.424         | BB   | 0.0807      | 22.42240     | 4.45740      | 4.3962  |
| 2      | 4.899         | BB   | 0.0982      | 487.61829    | 74.65633     | 95.6038 |

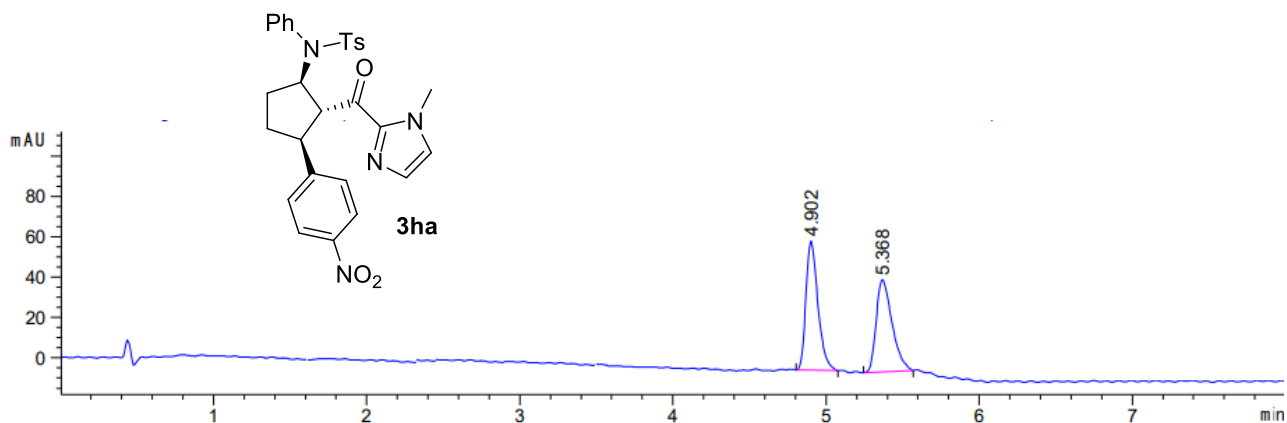

| Peak # | RetTime [min] | Type | Width [min] | Area [mAU*s] | Height [mAU] | Area %  |
|--------|---------------|------|-------------|--------------|--------------|---------|
| 1      | 4.902         | BB   | 0.0834      | 348.15546    | 64.05414     | 51.4364 |
| 2      | 5.368         | BB   | 0.1080      | 328.71075    | 45.67255     | 48.5636 |

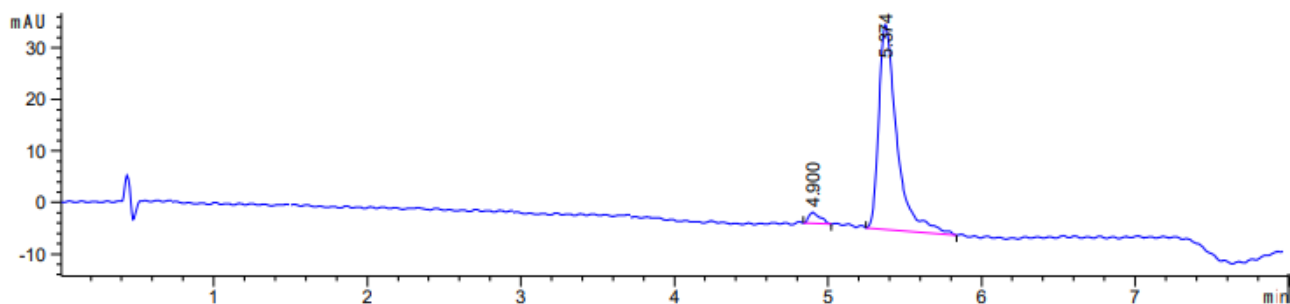

| Peak # | RetTime [min] | Type | Width [min] | Area [mAU*s] | Height [mAU] | Area %  |
|--------|---------------|------|-------------|--------------|--------------|---------|
| 1      | 4.900         | BB   | 0.0767      | 11.30044     | 2.17204      | 3.3581  |
| 2      | 5.374         | BB   | 0.1216      | 325.21017    | 39.67083     | 96.6419 |



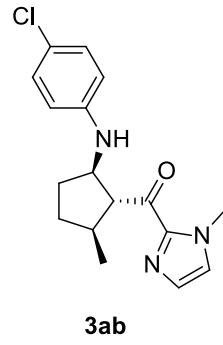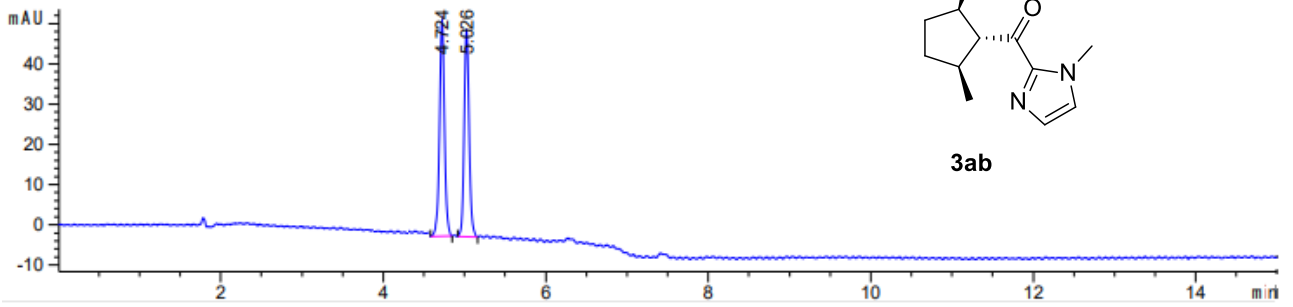

| Peak # | RetTime [min] | Type | Width [min] | Area [mAU*s] | Height [mAU] | Area %  |
|--------|---------------|------|-------------|--------------|--------------|---------|
| 1      | 4.724         | BB   | 0.0625      | 223.08469    | 53.62494     | 51.2709 |
| 2      | 5.026         | BB   | 0.0620      | 212.02527    | 51.56154     | 48.7291 |

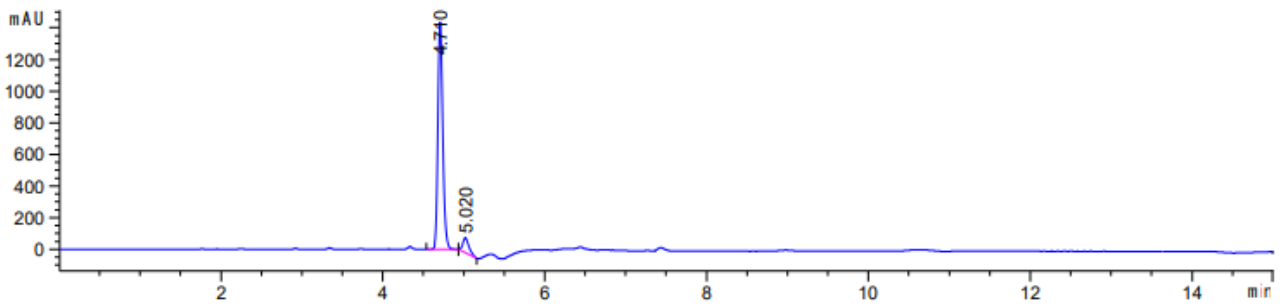

| Peak # | RetTime [min] | Type | Width [min] | Area [mAU*s] | Height [mAU] | Area %  |
|--------|---------------|------|-------------|--------------|--------------|---------|
| 1      | 4.710         | BB   | 0.0615      | 5857.86719   | 1437.29187   | 96.0767 |
| 2      | 5.020         | BB   | 0.0768      | 497.19684    | 95.35513     | 3.9233  |

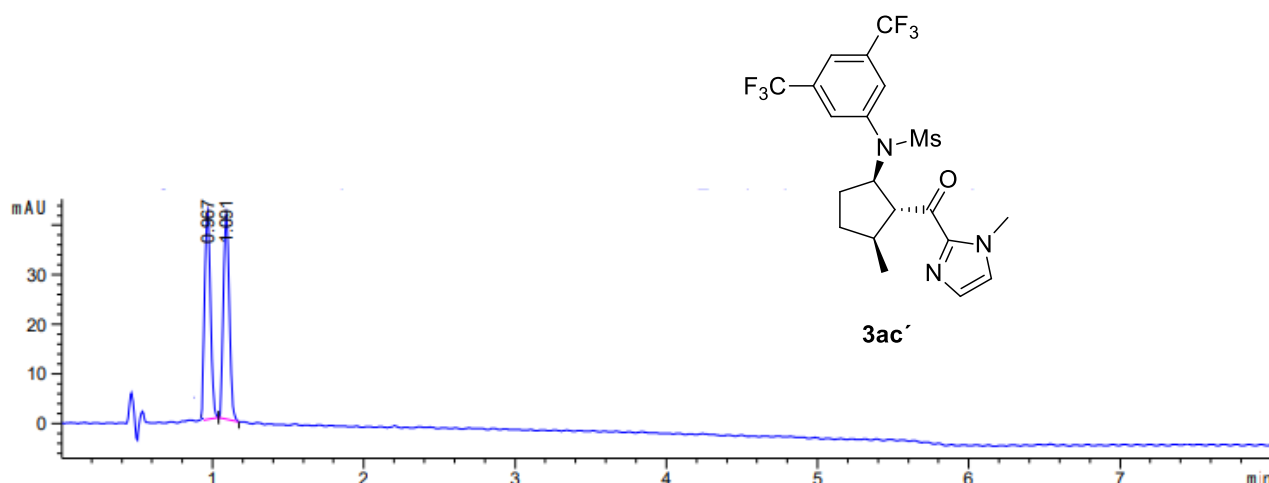

| Peak # | RetTime [min] | Type | Width [min] | Area [mAU*s] | Height [mAU] | Area %  |
|--------|---------------|------|-------------|--------------|--------------|---------|
| 1      | 0.967         | BB   | 0.0438      | 115.42554    | 42.37280     | 50.2617 |
| 2      | 1.091         | BB   | 0.0441      | 114.22376    | 41.55993     | 49.7383 |

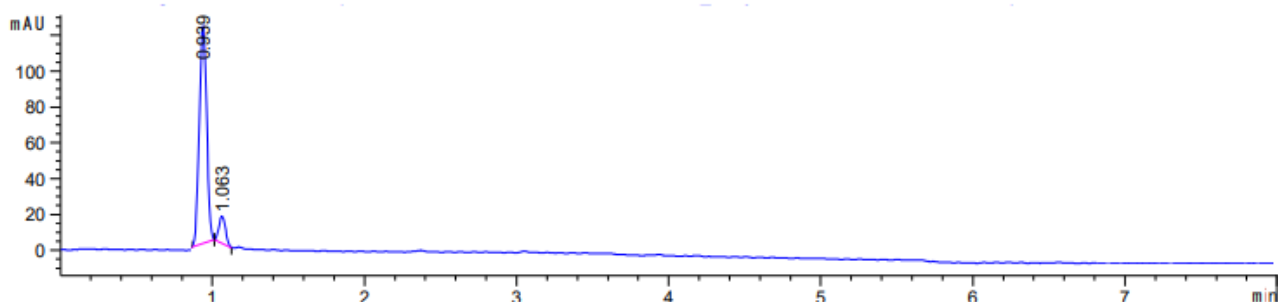

| Peak # | RetTime [min] | Type | Width [min] | Area [mAU*s] | Height [mAU] | Area %  |
|--------|---------------|------|-------------|--------------|--------------|---------|
| 1      | 0.939         | BB   | 0.0536      | 412.09918    | 121.47387    | 90.1237 |
| 2      | 1.063         | BB   | 0.0493      | 45.16010     | 14.91525     | 9.8763  |

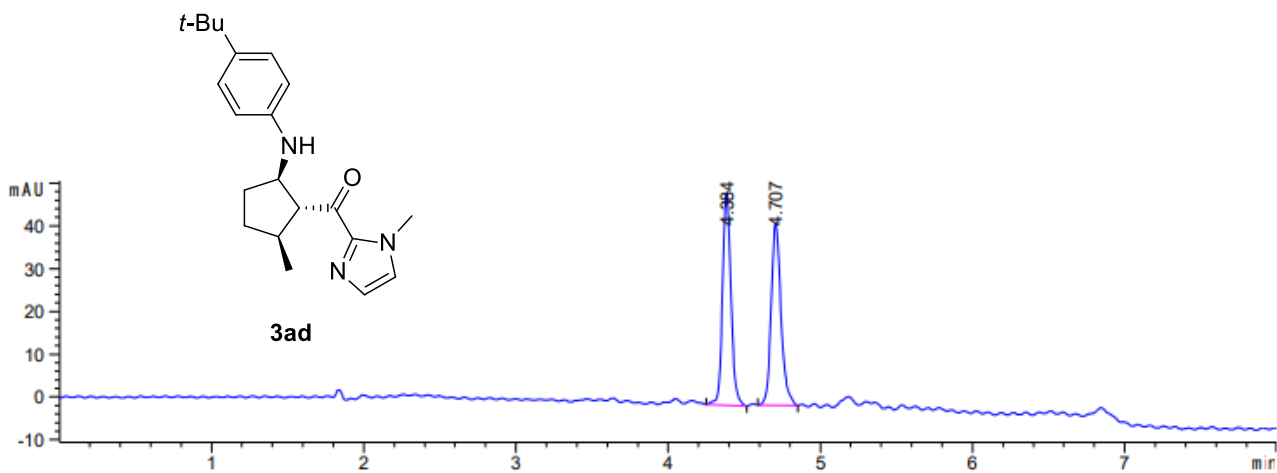

| Peak # | RetTime [min] | Type | Width [min] | Area [mAU*s] | Height [mAU] | Area %  |
|--------|---------------|------|-------------|--------------|--------------|---------|
| 1      | 4.384         | BB   | 0.0608      | 192.14474    | 50.08756     | 50.0587 |
| 2      | 4.707         | BB   | 0.0686      | 191.69391    | 42.49160     | 49.9413 |

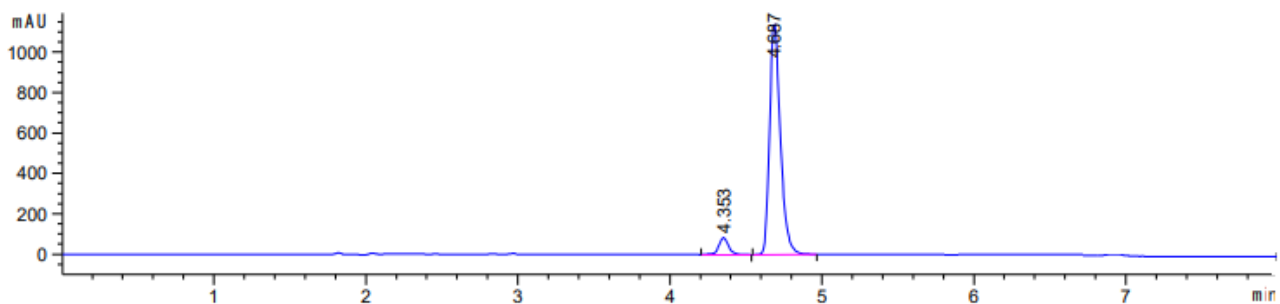

| Peak # | RetTime [min] | Type | Width [min] | Area [mAU*s] | Height [mAU] | Area %  |
|--------|---------------|------|-------------|--------------|--------------|---------|
| 1      | 4.353         | BB   | 0.0690      | 381.86783    | 84.04269     | 6.3364  |
| 2      | 4.687         | BB   | 0.0737      | 5644.70410   | 1142.19763   | 93.6636 |

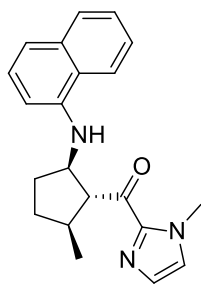

3ae

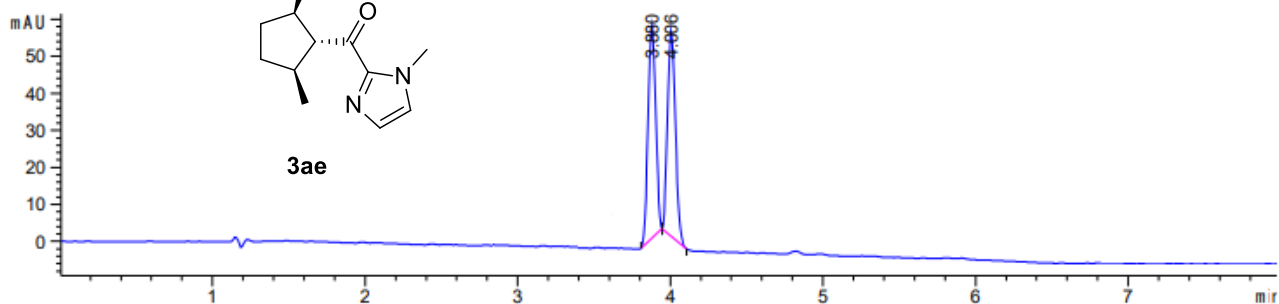

| Peak # | RetTime [min] | Type | Width [min] | Area [mAU*s] | Height [mAU] | Area %  |
|--------|---------------|------|-------------|--------------|--------------|---------|
| 1      | 3.880         | BB   | 0.0546      | 199.85112    | 57.39271     | 50.1431 |
| 2      | 4.006         | BB   | 0.0558      | 198.71025    | 55.43157     | 49.8569 |

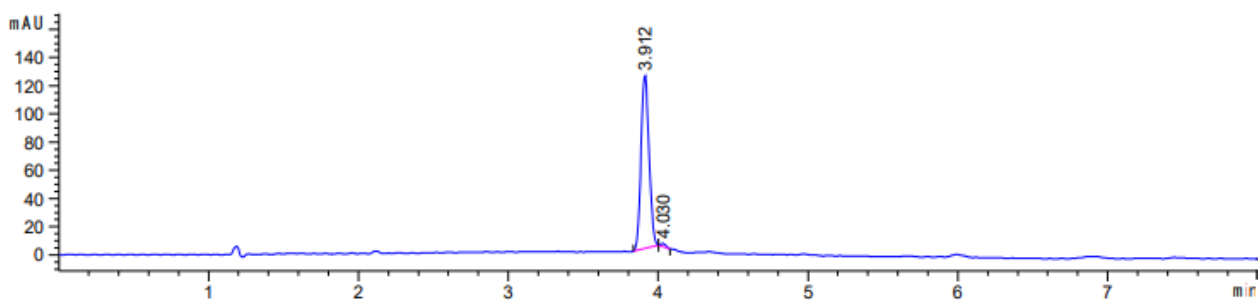

| Peak # | RetTime [min] | Type | Width [min] | Area [mAU*s] | Height [mAU] | Area %  |
|--------|---------------|------|-------------|--------------|--------------|---------|
| 1      | 3.912         | BB   | 0.0593      | 512.65790    | 122.77338    | 91.7595 |
| 2      | 4.030         | BB   | 0.0399      | 46.03962     | 2.25090      | 8.2405  |

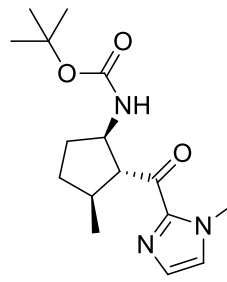

**4ad**

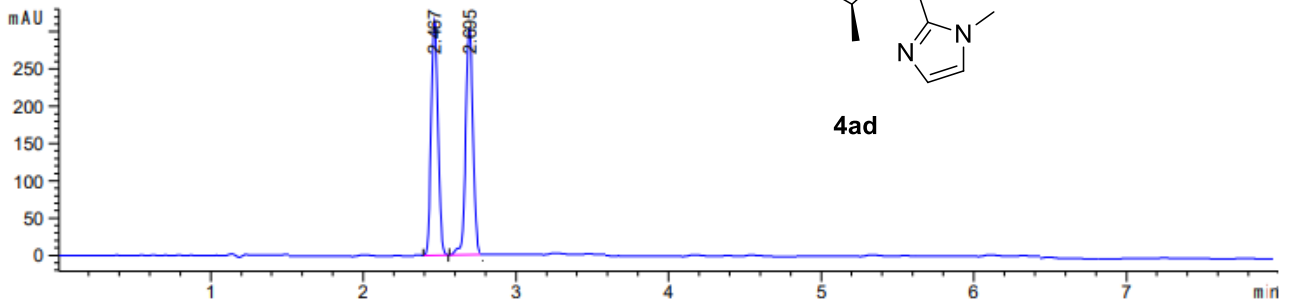

| Peak # | RetTime [min] | Type | Width [min] | Area [mAU*s] | Height [mAU] | Area %  |
|--------|---------------|------|-------------|--------------|--------------|---------|
| 1      | 2.467         | BB   | 0.0502      | 980.26660    | 315.78687    | 49.2318 |
| 2      | 2.695         | BB   | 0.0505      | 1010.85876   | 306.51648    | 50.7682 |

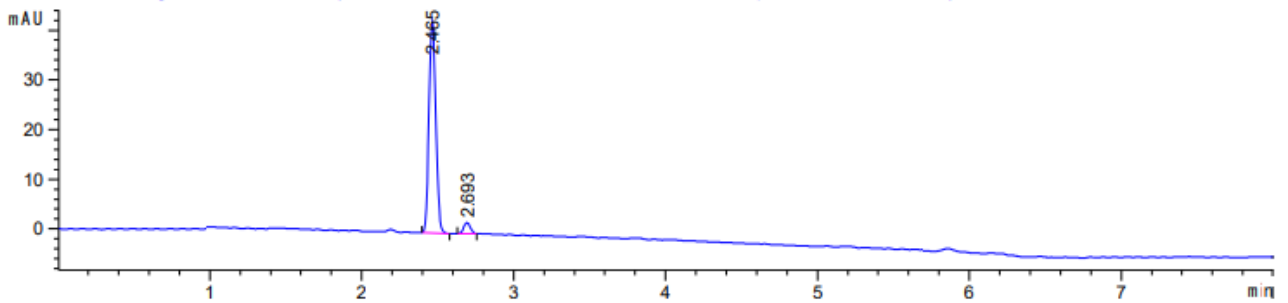

| Peak # | RetTime [min] | Type | Width [min] | Area [mAU*s] | Height [mAU] | Area %  |
|--------|---------------|------|-------------|--------------|--------------|---------|
| 1      | 2.465         | BB   | 0.0506      | 133.83217    | 42.61705     | 93.3666 |
| 2      | 2.693         | BB   | 0.0478      | 6.83212      | 2.22869      | 6.4363  |

## 12. References.

1. Y. Wang, M. Gu, *Anal. Chem.* **2010**, *82*, 7055-7062; b) Y. Wang, *Methods for Operating MS Instrument Systems*, United States Patent No. 6,983,213, **2006**; c) N. Ochiai, K. Sasamoto, K. MacNamara, *Journal of Chromatography A* **2012**, *1270*, 296-304; d) H. -P. Ho, R. -Y. Lee, C. -Y. Chen, S.- R. Wang, Z. -G. Li, M. -R. Lee, *Rapid Commun. Mass Spectrom.* **2011**, *25*, 25-32.
2. a) J. Ma, X. Shen, K. Harmsa, E. Meggers, *Dalton Trans.* **2016**, *45*, 8320-8323; b) J. Ma, X. Zhang, X. Huang, S. Luo, E. Meggers, *Nat. Protoc.* **2018**, *13*, 605-632.
3. D. A. Evans, K. R. Fandrick, H. -J. Song, *J. Am. Chem. Soc.* **2005**, *127*, 8942-8943.
4. M. C. Myers, A. R. Bharadwaj, B. C. Milgram, K. A. Scheidt, *J. Am. Chem. Soc.* **2005**, *127*, 14675-14680.
5. M. Zhang, T. Zhang, D. Zhang, W. Hu, *Adv. Synth. Catal.* **2020**, *362*, 4662-4667.
6. B. Muriel, A. Gagnebin, J. Waser, *Chem. Sci.*, **2019**, *10*, 10716-10722.
7. S. Maity, M. Zhu, R. S. Shinabery, N. Zheng, *Angew. Chem. Int. Ed.* **2012**, *51*, 222-226.
8. A. J. Boersma, B. L. Feringa, G. Roelfes, *Org. Lett.* **2007**, *9*, 3647-3650.
9. E. L. Tyson, E. P. Farney, T. P. Yoon, *Org. Lett.* **2012**, *14*, 1110-1113.
10. C. Allais, F. Liéby-Muller, T. Constantieux, J. Rodriguez, *Adv. Synth. Catal.* **2012**, *354*, 2537-2544.
11. H. J. Kuhn, S. E. Braslavsky, R. Schmidt, *Pure Appl. Chem.* **2004**, *76*, 2105-2146.
12. S. Hamai, F. Hirayama, *J. Phys. Chem.* **1983**, *87*, 83-89.
